# Supplementary material for: Highly diastereo- and enantioselective [3+2] annulation of isatin-derived Morita–Baylis–Hillman carbonates with trifluoropyruvate catalyzed by tertiary amines
Source: Royal Society of Chemistry journal article supplement (doi:10.1039/c3cc46490c), 2013-01-01
Supplement: c3cc46490c.pdf [file c3cc46490c.pdf]

## Highly Diastereo- and Enantioselective [3+2] Annulation of Isatin-derived Morita-Baylis-Hillman Carbonates with Trifluoropyruvate Catalyzed by Tertiary Amine

Neng-Jun Zhong,<sup>ab</sup> FengWei,<sup>ab</sup> Qing-Qing Xuan,<sup>ab</sup> Li Liu,<sup>\*a</sup> Dong Wang,<sup>a</sup>

Yong-Jun Chen.<sup>a</sup>

<sup>a</sup> *Beijing National Laboratory for Molecular Sciences (BNLMS), CAS Key Laboratory of Molecular Recognition and Function, Institute of Chemistry, Chinese Academy of Sciences, Beijing 100190, China.*

<sup>b</sup> *University of Chinese Academy of Sciences, Beijing 100049, China*

|                                                                                                                                |            |
|--------------------------------------------------------------------------------------------------------------------------------|------------|
| <b>1. General method.....</b>                                                                                                  | <b>S3</b>  |
| <b>2. General procedure for preparation of Isatin-derived MBH carbonates.....</b>                                              | <b>S4</b>  |
| <b>3. General procedure for phosphine-catalyzed Wittig reaction of MBH carbonate with ketone.....</b>                          | <b>S7</b>  |
| <b>4. General procedure for racemic products of [3+2] annulation of MBH carbonates with ketones.....</b>                       | <b>S8</b>  |
| <b>5. General procedure for tertiary amine-catalyzed enantioselective [3+2] annulation of MBH carbonates with ketones.....</b> | <b>S8</b>  |
| <b>6. The procedure for the reduction of product 4a.....</b>                                                                   | <b>S14</b> |
| <b>7. Plausible catalytic transitional state.....</b>                                                                          | <b>S15</b> |
| <b>8. X-ray crystallography of 4l compound.....</b>                                                                            | <b>S16</b> |
| <b>9. NMR Spectra.....</b>                                                                                                     | <b>S18</b> |
| <b>10. Chiral HPLC chromatography.....</b>                                                                                     | <b>S49</b> |

## 1. General Method

All reactions were carried out in oven dried flasks. All the  $^1\text{H}$  and  $^{13}\text{C}$  NMR were recorded on Bruker-AV 300 spectrometer and chemical shifts reported in  $\text{CDCl}_3$  or DMSO with tetramethylsilane as an internal standard. IR spectra were recorded on a NICOLET 6000 infrared spectrometer. Melting points were measured on Beijing-Tiker X-4 apparatus without correction. HRMS spectra were recorded on Thermo Fish Scientific-Exactivemass spectrometer. X-ray structure was determined on a Bruker Smart-1000 X-ray Diffraction meter. Common reagents were purchased from commercial sources and were used without further purification. Cinchona alkaloid-type catalysts<sup>1</sup> and all the substrates<sup>2</sup> were prepared according to original or modified literature procedures. In each case, enantiomeric ratio was determined by chiral HPLC analysis on Chiralcel column in comparison with authentic racemates. Optical rotation data was examined in  $\text{CHCl}_3$  solution and are reported as follows:  $[\alpha]_{\text{D}}^{25}$  ( $c$  in g per 100 mL of solvent). Column chromatography was performed using silica gel (200-300 mesh) eluting with ethyl acetate and petroleum ether. TLC was performed on glass-backed silica plates.

## References:

- (1) Waldmann, H.; Khedkar, V.; Duckert, H.; Schrmann, M. Oppel, I. M.; Kumar, K. *Angew. Chem. Int. Ed.* **2008**, *47*, 6869.
- (2)(a) Aikawa, K.; Mimura, S.; Numata, Y.; Mikami, K. *Eur. J. Org. Chem.* **2011**, 62–65.  
(b) Shanmugam, P.; Vaithyanathan, V.; *Can. J. Chem.* **2009**, *87*, 591. (c) Štambaský, J.; Malkov, A.; Kočovský, V. P. *J. Org. Chem.* **2008**, *73*, 9148.

## 2 General procedure for preparation of Isatin-derived MBH carbonates

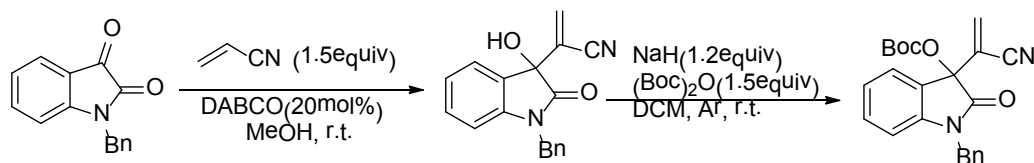

A mixture of *N*-benzyl isatin (6.2 mmol, 1 g), vinyl cyanide (9.3 mmol, 0.61 ml), and DABCO (1.24 mmol, 139 mg) in MeOH was stirred at room temperature. After completion of the reaction (monitored by TLC), the mixture was concentrated by vacuum, then was added EtOAc. The organic phase was washed with dilute hydrochloric acid and water. The organic layer was separated, dried (Na<sub>2</sub>SO<sub>4</sub>), and concentrated by vacuum. The crude product was purified by column chromatography over silica gel (gradient: petroleum ether / EtOAc = 4:1) to afford *N*-benzyl isatin-derived MBH adduct.

*N*-benzyl isatin-derived MBH adduct (1.7 mmol, 493 mg), was added slowly to a suspension of sodium hydride (2.1 mmol, 49 mg) in dry DCM (15 ml) at room temperature and the mixture was stirred for 10 min. Then the resulting solution was added slowly to a solution of Boc anhydride (2.55 mmol, 540.6 mg) in 2 mL dry DCM at room temperature and stirred at room temperature for overnight. The reaction mixture was directly filtered and the filtrate was concentrated by vacuum. The crude product was purified by column chromatography over silica gel (gradient: petroleum ether / EtOAc = 8:1) to afford the desired *N*-benzyl isatin-derived MBH carbonate.

### 1-benzyl-3-(1-cyanovinyl)-2-oxoindolin-3-yl tert-butyl carbonate (1a)

white solid. m.p. 126-128 °C. <sup>1</sup>H NMR (300 MHz, CDCl<sub>3</sub>) δ: 7.32-7.25 (m, 7H), 7.12-7.07 (t, *J* = 7.4 Hz, 1H), 6.75-6.72 (d, *J* = 7.8 Hz, 1H), 6.27 (s, 1H), 6.20 (s, 1H), 5.08-5.02 (d, *J* = 15.9 Hz, 1H), 4.94-4.89 (d, *J* = 15.9 Hz, 1H), 1.40 (s, 9H). <sup>13</sup>C NMR (75 MHz, CDCl<sub>3</sub>) δ: 170.9, 150.0, 143.4, 135.0, 133.4, 131.2, 128.8, 127.8, 127.3, 124.6, 123.9, 123.6, 120.4, 115.1, 110.2, 84.5, 79.3, 44.6, 27.6. IR ν<sub>max</sub> (KBr, film, cm<sup>-1</sup>): 1736, 1605, 1469, 1297, 758. HRMS (ESI): calcd for C<sub>23</sub>H<sub>22</sub>N<sub>2</sub>O<sub>4</sub> [M+Na]<sup>+</sup> 413.1472, found: 413.1470.

### 1-benzyl-3-(1-cyanovinyl)-5-fluoro-2-oxoindolin-3-yl tert-butyl carbonate (1b)

white solid. m.p. 152-154 °C. <sup>1</sup>H NMR (300 MHz, CDCl<sub>3</sub>) δ: 7.31-7.26 (m, 5H), 7.15-7.12 (dd, *J* = 7.5 Hz, *J* = 2.7 Hz, 1H), 7.01-6.95 (td, *J* = 9.0 Hz, *J* = 2.7 Hz, 1H), 6.67-6.63 (dd, *J* = 8.4 Hz, *J* = 3.9 Hz, 1H), 6.34 (s, 1H), 6.25 (s, 1H), 5.06-5.00 (d, *J* = 15.9 Hz, 1H), 4.95-4.90 (d, *J* = 15.9 Hz, 1H), 1.43 (s, 9H). <sup>13</sup>C NMR (75 MHz, CDCl<sub>3</sub>) δ: 170.7, 159.4 (d, *J* = 241.5 Hz), 150.0, 139.3, 134.6, 133.7, 128.9, 127.9, 127.3, 126.1 (d, *J* = 8.5 Hz), 119.8, 117.6 (d, *J* = 23.3 Hz), 114.8, 112.0 (d,



$J=25.5\text{Hz}$ ), 111.1 (d,  $J=8.3\text{Hz}$ ), 84.8, 79.1, 44.7, 27.6. IR  $\nu_{\text{max}}$  (KBr, film,  $\text{cm}^{-1}$ ): 1743, 1606, 1496, 1262, 798. HRMS (ESI): calcd for  $\text{C}_{23}\text{H}_{21}\text{FN}_2\text{O}_4$   $[\text{M}+\text{Na}]^+$  431.1378, found: 431.1376.

**1-benzyl-5-chloro-3-(1-cyanovinyl)-2-oxoindolin-3-yl tert-butyl carbonate (1c)**

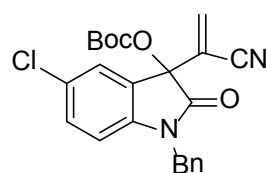

yellow solid. m.p. 146-148°C.  $^1\text{H}$  NMR (300 MHz,  $\text{CDCl}_3$ )  $\delta$ : 7.37-7.23 (m, 7H), 6.66-6.63 (d,  $J=8.4\text{Hz}$ , 1H), 6.34 (s, 1H), 6.25 (s, 1H), 5.04-4.99 (d,  $J=16.2\text{Hz}$ , 1H), 4.96-4.91 (d,  $J=16.2\text{Hz}$ , 1H), 1.43 (s, 9H).  $^{13}\text{C}$  NMR (75 MHz,  $\text{CDCl}_3$ )  $\delta$ : 170.5, 150.0, 141.9, 134.5, 133.6, 131.2, 129.0, 128.9, 128.0, 127.3, 126.3, 124.2, 119.7, 114.8, 111.3, 84.9, 79.0, 44.7, 27.6. IR  $\nu_{\text{max}}$  (KBr, film,  $\text{cm}^{-1}$ ): 1745, 1614, 1485, 1263, 730. HRMS (ESI): calcd for  $\text{C}_{23}\text{H}_{21}\text{ClN}_2\text{O}_4$   $[\text{M}+\text{Na}]^+$  447.1082, found: 447.1080.

**1-benzyl-5-bromo-3-(1-cyanovinyl)-2-oxoindolin-3-yl tert-butyl carbonate (1d)**

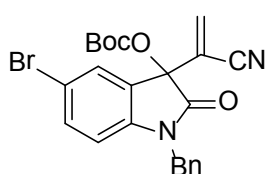

white solid. m.p. 147-149°C.  $^1\text{H}$  NMR (300 MHz,  $\text{CDCl}_3$ )  $\delta$ : 7.48 (s, 1H), 7.41-7.28 (m, 6H), 6.61-6.59 (d,  $J=8.3\text{Hz}$ , 1H), 6.34 (s, 1H), 6.25 (s, 1H), 5.04-4.98 (d,  $J=15.9\text{Hz}$ , 1H), 4.96-4.91 (d,  $J=15.9\text{Hz}$ , 1H), 1.43 (s, 9H).  $^{13}\text{C}$  NMR (75 MHz,  $\text{CDCl}_3$ )  $\delta$ : 170.4, 150.0, 142.4, 134.5, 134.1, 133.6, 128.9, 128.0, 127.3, 126.9, 126.6, 119.7, 116.2, 114.8, 111.8, 84.9, 78.9, 44.7, 27.6. IR  $\nu_{\text{max}}$  (KBr, film,  $\text{cm}^{-1}$ ): 1746, 1611, 1484, 1293, 730. HRMS (ESI): calcd for  $\text{C}_{23}\text{H}_{21}\text{BrN}_2\text{O}_4$   $[\text{M}+\text{Na}]^+$  491.0577, found: 491.0575.

**1-benzyl-3-(1-cyanovinyl)-5-iodo-2-oxoindolin-3-yl tert-butyl carbonate (1e)**

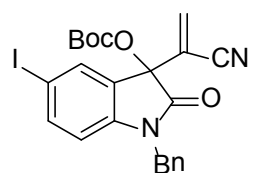

white solid. m.p. 145-147°C.  $^1\text{H}$  NMR (300 MHz,  $\text{CDCl}_3$ )  $\delta$ : 7.63-7.57 (t, 2H), 7.34-7.27 (m, 5H), 6.51-6.48 (d,  $J=8.2\text{Hz}$ , 1H), 6.33 (s, 1H), 6.24 (s, 1H), 5.03-4.98 (d,  $J=16.0\text{Hz}$ , 1H), 4.95-4.90 (d,  $J=16.0\text{Hz}$ , 1H), 1.43 (s, 9H).  $^{13}\text{C}$  NMR (75 MHz,  $\text{CDCl}_3$ )  $\delta$ : 170.2, 150.0, 143.1, 140.0, 134.4, 133.5, 132.4, 128.9, 127.9, 127.3, 126.9, 119.8, 114.8, 112.3, 85.8, 84.9, 78.7, 44.6, 27.6. IR  $\nu_{\text{max}}$  (KBr, film,  $\text{cm}^{-1}$ ): 1746, 1605, 1482, 1296, 730. HRMS (ESI): calcd for  $\text{C}_{23}\text{H}_{21}\text{IN}_2\text{O}_4$   $[\text{M}+\text{Na}]^+$  539.0438, found: 539.0435.

**1-benzyl-3-(1-cyanovinyl)-5-methyl-2-oxoindolin-3-yl tert-butyl carbonate (1f)**

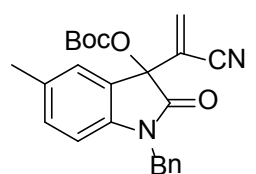

yellow solid. m.p. 162-164°C.  $^1\text{H}$  NMR (300 MHz,  $\text{CDCl}_3$ )  $\delta$ : 7.35-7.19 (m, 6H), 7.08-7.06 (d,  $J=7.7\text{Hz}$ , 1H), 6.62-6.60 (d,  $J=7.6\text{Hz}$ , 1H), 6.28 (s, 1H), 6.20 (s, 1H), 5.05-4.99 (d,  $J=16.1\text{Hz}$ , 1H), 4.94-4.89 (d,  $J=16.1\text{Hz}$ , 1H), 2.31 (s, 3H), 1.42 (s, 9H).  $^{13}\text{C}$  NMR (75 MHz,  $\text{CDCl}_3$ )  $\delta$ : 170.8, 150.0, 140.9, 135.1, 133.3, 133.2, 131.5, 128.8, 127.7, 127.3, 124.6, 124.5, 120.5, 115.2, 110.0, 84.4, 79.5, 44.6, 27.6, 21.1. IR  $\nu_{\text{max}}$  (KBr, film,  $\text{cm}^{-1}$ ): 1753, 1738, 1622, 1496, 1294, 730. HRMS (ESI): calcd for  $\text{C}_{24}\text{H}_{24}\text{N}_2\text{O}_4$   $[\text{M}+\text{Na}]^+$  427.1628, found: 427.1626.

**1-benzyl-3-(1-cyanovinyl)-5-methoxy-2-oxoindolin-3-yl tert-butyl carbonate(1g)**

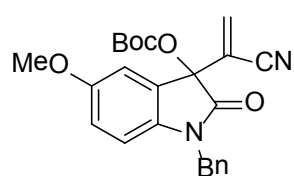

yellow solid. m.p. 114-116°C.  $^1\text{H}$  NMR (300 MHz,  $\text{CDCl}_3$ )  $\delta$ : 7.37-7.28 (m, 5H), 6.99-6.98 (d,  $J = 2.3\text{Hz}$ , 1H), 6.81-6.77 (d,  $J = 78.6\text{Hz}$ ,  $J = 2.3\text{Hz}$ , 1H), 6.64-6.61 (d,  $J = 8.8\text{Hz}$ , 1H), 6.29 (s, 1H), 6.21 (s, 1H), 5.05-4.99 (d,  $J = 15.9\text{Hz}$ , 1H), 4.93-4.88 (d,  $J = 15.9\text{Hz}$ , 1H), 3.75 (s, 3H), 1.42 (s, 9H).  $^{13}\text{C}$  NMR (75 MHz,  $\text{CDCl}_3$ )  $\delta$ : 170.6, 156.5, 150.0, 136.5, 135.1, 133.4, 128.8, 127.8, 127.3, 125.8, 120.4, 115.6, 115.1, 110.9, 110.9, 84.5, 79.6, 55.8, 44.6, 27.6. IR  $\nu_{\text{max}}$  (KBr, film,  $\text{cm}^{-1}$ ): 1757, 1724, 1606, 1497, 1287, 728. HRMS (ESI): calcd for  $\text{C}_{24}\text{H}_{24}\text{N}_2\text{O}_5$   $[\text{M}+\text{Na}]^+$  443.1577, found: 443.1575.

**1-benzyl-3-(1-cyanovinyl)-2-oxo-5-(trifluoromethoxy)indolin-3-yl tert-butyl carbonate(1h)**

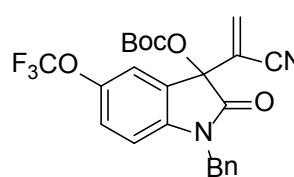

white solid. m.p. 103-105°C.  $^1\text{H}$  NMR (300 MHz,  $\text{CDCl}_3$ )  $\delta$ : 7.36-7.27 (m, 6H), 7.17-7.13 (m, 1H), 6.73-6.71 (d,  $J = 8.4\text{Hz}$ , 1H), 6.35 (s, 1H), 6.27 (s, 1H), 5.08-5.02 (d,  $J = 15.9\text{Hz}$ , 1H), 4.94-4.89 (d,  $J = 15.9\text{Hz}$ , 1H), 1.42 (s, 9H).  $^{13}\text{C}$  NMR (75 MHz,  $\text{CDCl}_3$ )  $\delta$ : 170.7, 150.0, 145.2 (d,  $J = 2.3\text{Hz}$ ), 142.1, 134.4, 133.8, 129.0, 128.0, 127.3, 126.2, 124.3, 120.4 (d,  $J = 255.8\text{Hz}$ ), 119.6, 117.8, 114.7, 110.9, 85.0, 78.9, 44.8, 27.5. IR  $\nu_{\text{max}}$  (KBr, film,  $\text{cm}^{-1}$ ): 1745, 1623, 1491, 1454, 1264, 873. HRMS (ESI): calcd for  $\text{C}_{24}\text{H}_{21}\text{F}_3\text{N}_2\text{O}_4$   $[\text{M}+\text{Na}]^+$  497.1295, found: 497.1297.

**1-benzyl-3-(1-cyanovinyl)-5-nitro-2-oxoindolin-3-yl tert-butyl carbonate(1i)**

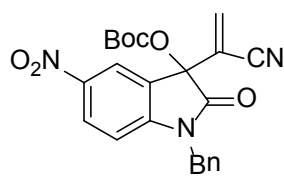

white solid. m.p. 133-135°C.  $^1\text{H}$  NMR (300 MHz,  $\text{CDCl}_3$ )  $\delta$ : 8.26-8.23 (m, 2H), 7.37-7.31 (m, 5H), 6.84-6.81 (dd,  $J = 7.5\text{Hz}$ ,  $J = 2.1\text{Hz}$ , 1H), 6.49 (s, 1H), 6.33 (s, 1H), 5.05 (s, 2H), 1.42 (s, 9H).  $^{13}\text{C}$  NMR (75 MHz,  $\text{CDCl}_3$ )  $\delta$ : 171.0, 150.1, 148.9, 144.0, 134.3, 133.8, 129.1, 128.3, 128.0, 125.7, 119.7, 118.8, 114.5, 110.2, 85.5, 78.4, 45.0, 27.6. IR  $\nu_{\text{max}}$  (KBr, film,  $\text{cm}^{-1}$ ): 1750, 1617, 1486, 1291, 735. HRMS (ESI): calcd for  $\text{C}_{23}\text{H}_{21}\text{N}_3\text{O}_6$   $[\text{M}+\text{Na}]^+$  458.1323, found: 458.1320.

**1-benzyl-3-(1-cyanovinyl)-5,7-dimethyl-2-oxoindolin-3-yl tert-butyl carbonate(1j)**

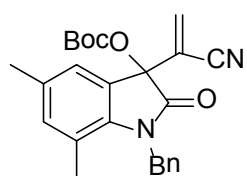

yellow solid. m.p. 160-162°C.  $^1\text{H}$  NMR (300 MHz,  $\text{CDCl}_3$ )  $\delta$ : 7.35-7.235 (m, 5H), 7.06 (s, 1H), 6.88 (s, 1H), 6.27 (s, 1H), 6.20 (s, 1H), 5.19 (s, 2H), 2.28 (s, 3H), 2.20 (s, 3H), 1.43 (s, 9H).  $^{13}\text{C}$  NMR (75 MHz,  $\text{CDCl}_3$ )  $\delta$ : 171.7, 150.1, 138.9, 137.3, 135.7, 133.3, 133.2, 128.8, 127.2, 125.9, 125.5, 122.3, 120.9, 120.5, 115.3, 84.3, 79.1, 45.8, 27.6, 20.7, 18.6. IR  $\nu_{\text{max}}$  (KBr, film,  $\text{cm}^{-1}$ ): 1744, 1727, 1605, 1499, 1288, 734. HRMS (ESI): calcd for  $\text{C}_{25}\text{H}_{26}\text{N}_2\text{O}_4$   $[\text{M}+\text{Na}]^+$  441.1785, found: 441.1782.

**1-benzyl-3-(1-cyanovinyl)-7-fluoro-2-oxoindolin-3-yl tert-butyl carbonate(1k)**

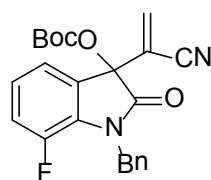

yellow solid. m.p. 142-144 °C.  $^1\text{H}$  NMR (300 MHz,  $\text{CDCl}_3$ )  $\delta$ : 7.41-7.24 (m, 5H), 7.21-7.18 (m, 1H), 7.12-7.04 (m, 2H), 6.22 (s, 1H), 6.20 (s, 1H), 5.10 (s, 2H), 1.41 (s, 9H).  $^{13}\text{C}$  NMR (75 MHz,  $\text{CDCl}_3$ )  $\delta$ : 170.6, 150.0, 147.6 (d,  $J=244.5\text{Hz}$ ), 136.2, 133.8, 130.1(d,  $J=9.8\text{Hz}$ ), 128.5, 127.7, 127.5, 127.5, 124.4 (d,  $J=6.0\text{Hz}$ ), 119.9 (d,  $J=6.0\text{Hz}$ ), 119.7 (d,  $J=6.0\text{Hz}$ ), 119.4, 114.8, 84.8, 79.0, 46.1 (d,  $J=4.5\text{Hz}$ ), 27.6. IR  $\nu_{\text{max}}$  (KBr, film,  $\text{cm}^{-1}$ ): 1754, 1631, 1476, 1286, 736. HRMS (ESI): calcd for  $\text{C}_{23}\text{H}_{21}\text{FN}_2\text{O}_4$   $[\text{M}+\text{Na}]^+$  431.1378, found: 431.1375.

#### 1-benzyl-7-bromo-3-(1-cyanovinyl)-2-oxoindolin-3-yl tert-butyl carbonate(1l)

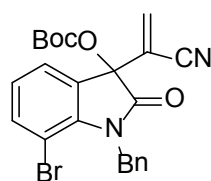

yellow solid. m.p. 161-163 °C.  $^1\text{H}$  NMR (300 MHz,  $\text{CDCl}_3$ )  $\delta$ : 7.50-7.47 (t, 1H), 7.38-7.36 (dd,  $J = 7.4\text{Hz}$ ,  $J = 1.2\text{Hz}$ , 1H), 7.33-7.23 (m, 5H), 7.03-6.98 (dd,  $J=8.1\text{Hz}$ ,  $J=7.5\text{Hz}$ , 1H), 6.24 (s, 1H), 6.22 (s, 1H), 5.52-5.46 (d,  $J=16.5\text{Hz}$ , 1H), 5.40-5.35 (d,  $J = 16.5\text{Hz}$ , 1H), 1.41 (s, 9H).  $^{13}\text{C}$  NMR (75 MHz,  $\text{CDCl}_3$ )  $\delta$ : 171.6, 150.0, 141.0, 137.2, 136.9, 133.9, 128.5, 127.0, 127.2, 126.4, 124.8, 122.9, 120.0, 114.9, 103.3, 84.9, 78.4, 45.4, 27.6. IR  $\nu_{\text{max}}$  (KBr, film,  $\text{cm}^{-1}$ ): 1747, 1604, 1463, 1289, 730. HRMS (ESI): calcd for  $\text{C}_{23}\text{H}_{21}\text{BrN}_2\text{O}_4$   $[\text{M}+\text{Na}]^+$  491.0577, found: 491.0573.

#### tert-butyl (3-(1-cyanovinyl)-1-methyl-2-oxoindolin-3-yl) carbonate(1m)

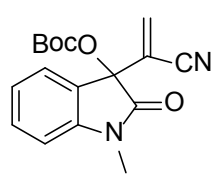

yellow solid. m.p. 113-115 °C.  $^1\text{H}$  NMR (300 MHz,  $\text{CDCl}_3$ )  $\delta$ : 7.45-7.37 (m, 2H), 7.16-7.11 (t,  $J = 7.5\text{Hz}$ , 1H), 6.93-6.90 (d,  $J=7.8\text{Hz}$ , 1H), 6.26 (s, 1H), 6.18 (s, 1H), 3.28 (s, 3H), 1.37 (s, 9H).  $^{13}\text{C}$  NMR (75 MHz,  $\text{CDCl}_3$ )  $\delta$ : 170.7, 149.9, 144.2, 133.4, 131.4, 124.6, 123.9, 123.5, 120.2, 115.0, 109.1, 84.4, 79.2, 27.5, 26.8. IR  $\nu_{\text{max}}$  (KBr, film,  $\text{cm}^{-1}$ ): 1758, 1727, 1610, 1471, 1288, 757. HRMS (ESI): calcd for  $\text{C}_{17}\text{H}_{18}\text{N}_2\text{O}_4$   $[\text{M}+\text{Na}]^+$  337.1158, found: 337.1155.

### 3. General procedure for phosphine-catalyzed Wittig reaction of MBH carbonate with ketone

To a solution of Morita-Baylis-Hillman carbonate **1d** (0.1 mmol) in THF (1 ml) was added  $\text{PPh}_3$  (1.2 equiv) under Arat room temperature, then 3, 3, 3-trifluoropyruvate **2a** (0.2 mmol, 25  $\mu\text{l}$ ) was added. The reaction mixture was stirred for 24 h. After concentrated by vacuum, the resulting mixture was purified by column chromatography over silica gel (gradient: petroleum ether / EtOAc = 14: 1) to afford the desired product

#### Ethyl-4-(1-benzyl-5-bromo-2-oxoindolin-3-ylidene)-4-cyano-2-(trifluoromethyl)-but-2-enoate(3)

red solid.(one isomer). yield 45%.m.p. 141-143 °C.  $^1\text{H}$  NMR (300 MHz,  $\text{CDCl}_3$ )  $\delta$ : 8.37-8.36 (d,  $J=1.5$  Hz, 1H), 8.28-8.27 (d,  $J=1.8$  Hz, 1H), 7.40-7.37 (dd,  $J=8.4\text{Hz}$ ,  $J=2.1\text{Hz}$ , 1H), 7.29-7.17 (m, 5H), 6.581-6.56 (d,  $J=8.4\text{Hz}$ , 1H), 4.81 (s, 2H), 4.39-4.32

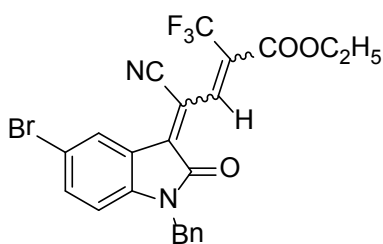

(q,  $J=7.2\text{Hz}$ ), 1.33-1.29 (t,  $J = 7.2\text{Hz}$ , 3H).  $^{13}\text{C}$  NMR (75 MHz,  $\text{CDCl}_3$ )  $\delta$ : 164.7, 161.1, 143.9, 137.5, 136.9, 134.2, 131.9 (q,  $J=6.8\text{Hz}$ ), 129.9 (q,  $J=32.3\text{Hz}$ ), 129.1, 128.4, 128.3, 127.3, 121.4 (q,  $J=272.3\text{Hz}$ ), 120.9, 116.3, 113.9, 111.4, 110.4, 62.9, 43.9, 13.9. IR  $\nu_{\text{max}}$  (KBr, film,  $\text{cm}^{-1}$ ): 2217, 1732, 1710, 1602, 1474, 1181, 1138. HRMS (ESI): calcd for  $\text{C}_{23}\text{H}_{16}\text{BrF}_3\text{N}_2\text{O}_3$   $[\text{M}+\text{Na}]^+$  527.0188, found: 527.0189.

red solid (another isomer). yield 24%. m.p. 144-146°C.  $^1\text{H}$  NMR (300 MHz,  $\text{CDCl}_3$ )  $\delta$ : 8.41 (s, 1H), 8.36-8.35 (d,  $J=1.8\text{ Hz}$ , 1H), 7.50-7.46 (dd,  $J=8.4\text{Hz}$ ,  $J=1.8\text{Hz}$ , 1H), 7.37-7.25 (m, 5H), 6.67-6.64 (d,  $J=8.4\text{Hz}$ , 1H), 4.90 (s, 2H), 4.43-4.36 (q,  $J=7.2\text{Hz}$ ), 1.41-1.37 (t,  $J = 7.2\text{Hz}$ , 3H).  $^{13}\text{C}$  NMR (75 MHz,  $\text{CDCl}_3$ )  $\delta$ : 164.4, 161.4, 161.3, 143.9, 144.2, 137.6, 137.5, 137.5, 137.0, 134.2, 129.1, 128.3, 128.2 (q,  $J=32.3\text{Hz}$ ), 127.3, 121.2 (q,  $J=271.5\text{Hz}$ ), 120.6, 116.3, 111.5, 108.8, 62.7, 44.0, 14.0. IR  $\nu_{\text{max}}$  (KBr, film,  $\text{cm}^{-1}$ ): 2221, 1726, 1710, 1602, 1470, 1173, 1149. HRMS (ESI): calcd for  $\text{C}_{23}\text{H}_{16}\text{BrF}_3\text{N}_2\text{O}_3$   $[\text{M}+\text{Na}]^+$  527.0188, found: 527.0189.

#### 4. General procedure for racemic products of [3+2] annulation of MBH carbonates with ketones

To a solution of Morita-Baylis-Hillman carbonate **1** (0.2 mmol, 78 mg) in EtOAc (1 ml) was added 3, 3, 3-trifluoropyruvate **2** (0.4 mmol, 50  $\mu\text{l}$ ) at  $-40^\circ\text{C}$ . After 5 minutes, DABCO (0.04 mmol, 5 mg) was added. The reaction mixture was stirred for 1-3h till completion as judged by TLC. Then, the mixture was purified by column chromatography over silica gel (gradient: petroleum ether / EtOAc = 10~14: 1) to afford the desired racemic product **4**.

#### 5. General procedure for tertiary amine-catalyzed enantioselective [3+2] annulation of MBH carbonates with ketones

To a solution of Morita-Baylis-Hillman carbonate **1** (0.1 mmol, 39 mg) in 1 ml of EtOAc was added 3, 3, 3-trifluoropyruvate **2** (0.2 mmol, 25  $\mu\text{l}$ ) at  $-40^\circ\text{C}$ . After 5 minutes, catalyst **5f** (0.02 mmol, 9 mg) was added. The reaction mixture was stirred for 1-3h till completion as judged by TLC. Then, the mixture was purified by column chromatography over silica gel (gradient: petroleum ether / EtOAc = 10~14: 1) to afford the desired product **4**.

#### Ethyl 1'-benzyl-4-cyano-2'-oxo-2-(trifluoromethyl)-2H-spiro[furan-3,3'-indoline]-2-carboxylate (**4a**)

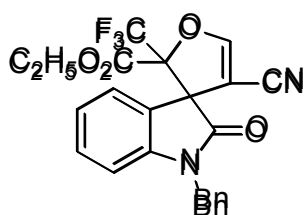

white solid. yield 94%, dr 19:1, ee 97%.  $[\alpha]_{\text{D}}^{20} = +83.7$  ( $c$  0.92,  $\text{CHCl}_3$ ). m.p. 104-106°C.  $^1\text{H}$  NMR (300 MHz,  $\text{CDCl}_3$ )  $\delta$ : 7.34 (s, 1H), 7.33-7.24 (m, 6H), 7.08-7.01 (m, 2H), 6.03-6.71 (d,  $J=8.1\text{Hz}$ , 1H), 5.31-5.26 (d,  $J=15.9\text{Hz}$ , 1H), 4.74-4.69 (d,  $J = 15.9\text{Hz}$ , 1H), 3.94-3.83 (dq,  $J=10.8\text{Hz}$ ,  $J=7.2\text{Hz}$ , 1H),

3.67-3.56 (dq,  $J=10.8\text{Hz}$ ,  $J=7.2\text{Hz}$ , 1H), 0.72-0.67 (t,  $J = 7.2\text{Hz}$ , 3H).  $^{13}\text{C}$  NMR (75 MHz,  $\text{CDCl}_3$ )  $\delta$ : 169.6, 161.0, 159.6, 142.6, 134.7, 131.4, 131.0, 128.9, 128.0, 127.2, 124.6, 123.4, 121.0 (q,  $J=286.5\text{Hz}$ ), 110.8, 109.9, 94.7 (q,  $J=31.5\text{Hz}$ ), 93.9, 63.6, 60.7, 44.7, 13.1. IR  $\nu_{\text{max}}$  (KBr, film,  $\text{cm}^{-1}$ ): 2232, 1763, 1734, 1640, 1489, 1148. HRMS (ESI): calcd for  $\text{C}_{23}\text{H}_{17}\text{F}_3\text{N}_2\text{O}_4$   $[\text{M}+\text{H}]^+$  443.1213, found: 443.1213. HPLC analysis [Chiralcel AD, n-hexane/ i-propanol (90:10),  $25^\circ\text{C}$ ,  $0.8\text{ mL}\cdot\text{min}^{-1}$ ,  $t_{\text{R}} = 23.1\text{ min}$  (minor), 36.8 min (major)].

**Ethyl 1'-benzyl-4-cyano-5'-fluoro-2'-oxo-2-(trifluoromethyl)-2H-spiro[furan-3,3'-indoline]-2-carboxylate(4b)**

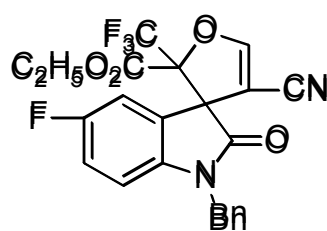

white solid. yield 93%, dr 14:1, ee 96%.  $[\alpha]_{\text{D}}^{20} = +72.0$  ( $c$  0.86,  $\text{CHCl}_3$ ). m.p.  $132\text{-}134^\circ\text{C}$ .  $^1\text{H}$  NMR (300 MHz,  $\text{CDCl}_3$ )  $\delta$ : 7.61 (s, 1H), 7.37-7.26 (m, 5H), 7.02-6.95 (td,  $J=9.0\text{Hz}$ ,  $J=2.7\text{Hz}$ , 1H), 6.86-6.83 (dd,  $J=7.5\text{Hz}$ ,  $J=2.7\text{Hz}$ , 1H), 6.74-6.63 (d,  $J=8.7\text{Hz}$ ,  $J=4.2\text{Hz}$ , 1H), 5.27-5.22 (d,  $J=15.6\text{Hz}$ , 1H), 4.75-4.70 (d,  $J = 15.6\text{Hz}$ , 1H), 4.03-3.92 (dq,  $J=10.5\text{Hz}$ ,  $J=6.9\text{Hz}$ , 1H), 3.83-3.71 (dq,  $J=10.5\text{Hz}$ ,  $J=6.9\text{Hz}$ , 1H), 0.83-0.78 (t,  $J = 7.2\text{Hz}$ , 3H).  $^{13}\text{C}$  NMR (75 MHz,  $\text{CDCl}_3$ )  $\delta$ : 169.3, 160.7, 159.8, 159.2 (d,  $J=255.8\text{Hz}$ ), 138.6 (d,  $J=2.3\text{Hz}$ ), 134.3, 129.0, 128.1, 127.1, 126.0 (d,  $J=7.5\text{Hz}$ ), 120.9 (q,  $J=286.5\text{Hz}$ ), 117.9 (d,  $J=23.5\text{Hz}$ ), 112.9 (d,  $J=26.3\text{Hz}$ ), 110.8 (d,  $J=7.5\text{Hz}$ ), 110.5, 94.3 (q,  $J=31.5\text{Hz}$ ), 93.5, 63.8, 60.9, 44.9, 13.18. IR  $\nu_{\text{max}}$  (KBr, film,  $\text{cm}^{-1}$ ): 2231, 1762, 1732, 1635, 1493, 1149. HRMS (ESI): calcd for  $\text{C}_{23}\text{H}_{16}\text{F}_4\text{N}_2\text{O}_4$   $[\text{M}+\text{H}]^+$  461.1120, found: 461.1119. HPLC analysis [Chiralcel AD, n-hexane/ i-propanol (90:10),  $25^\circ\text{C}$ ,  $1.0\text{ mL}\cdot\text{min}^{-1}$ ,  $t_{\text{R}} = 14.5\text{ min}$  (minor), 26.5 min (major)].

**Ethyl 1'-benzyl-5'-chloro-4-cyano-2'-oxo-2-(trifluoromethyl)-2H-spiro[furan-3,3'-indoline]-2-carboxylate(4c)**

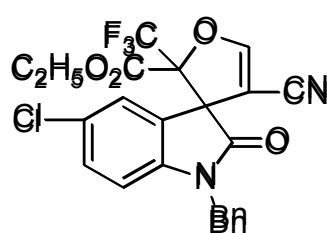

white solid. yield 91%, dr 12:1, ee 93%.  $[\alpha]_{\text{D}}^{20} = +76.5$  ( $c$  1.00,  $\text{CHCl}_3$ ). m.p.  $163\text{-}165^\circ\text{C}$ .  $^1\text{H}$  NMR (300 MHz,  $\text{CDCl}_3$ )  $\delta$ : 7.62 (s, 1H), 7.34-7.23 (m, 6H), 7.07-7.06 (d,  $J=1.5\text{Hz}$ , 1H), 6.66-6.63 (d,  $J=8.4\text{Hz}$ , 1H), 5.26-5.21 (d,  $J=15.9\text{Hz}$ , 1H), 4.77-4.71 (d,  $J = 15.9\text{Hz}$ , 1H), 4.04-3.93 (dq,  $J=10.8\text{Hz}$ ,  $J=7.2\text{Hz}$ , 1H), 3.85-3.74 (dq,  $J=10.8\text{Hz}$ ,  $J=7.2\text{Hz}$ , 1H), 0.86-0.81 (t,  $J = 7.2\text{Hz}$ , 3H).  $^{13}\text{C}$  NMR (75 MHz,  $\text{CDCl}_3$ )  $\delta$ : 169.1, 160.9, 159.8, 141.1, 134.1, 131.3, 129.0, 128.9, 128.2, 127.1, 126.2, 125.0, 121.0 (q,  $J=286.5\text{Hz}$ ), 111.0, 110.5, 94.3 (q,  $J=33.0\text{Hz}$ ), 93.5, 63.9, 60.9, 44.9, 13.2. IR  $\nu_{\text{max}}$  (KBr, film,  $\text{cm}^{-1}$ ): 2230, 1763, 1734, 1635, 1483, 1175. HRMS (ESI): calcd for  $\text{C}_{23}\text{H}_{16}\text{ClF}_3\text{N}_2\text{O}_4$   $[\text{M}+\text{H}]^+$  477.0823, found: 477.0824. HPLC analysis [Chiralcel AD, n-hexane/ i-propanol (90:10),  $25^\circ\text{C}$ ,  $1.0\text{ mL}\cdot\text{min}^{-1}$ ,  $t_{\text{R}} = 15.4\text{ min}$  (minor), 36.4 min (major)].

**Ethyl 1'-benzyl-5'-bromo-4-cyano-2'-oxo-2-(trifluoromethyl)-2H-spiro[furan-3,3'-indoline]-2-carboxylate(4d)**

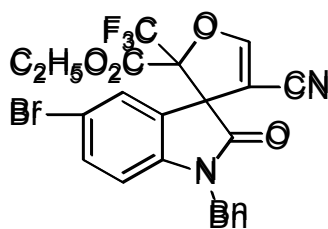

white solid. yield 86%, dr 17:1, ee 95%.  $[\alpha]_D^{20} = +64.4$  ( $c$  0.9,  $\text{CHCl}_3$ ). m.p. 184-186 °C.  $^1\text{H}$  NMR (300 MHz,  $\text{CDCl}_3$ )  $\delta$ : 7.62 (s, 1H), 7.41-7.26 (m, 6H), 7.20-7.19 (d,  $J=1.8$  Hz, 1H), 6.61-6.58 (d,  $J=8.4$  Hz, 1H), 5.25-5.20 (d,  $J=15.9$  Hz, 1H), 4.77-4.71 (d,  $J=15.9$  Hz, 1H), 4.04-3.93 (dq,  $J=10.5$  Hz,  $J=7.2$  Hz, 1H), 3.86-3.75 (dq,  $J=10.5$  Hz,  $J=7.2$  Hz, 1H), 0.87-0.82 (t,  $J=7.2$  Hz, 3H).  $^{13}\text{C}$  NMR (75 MHz,  $\text{CDCl}_3$ )  $\delta$ : 169.1, 160.9, 159.9, 141.6, 134.2, 134.1, 129.0, 128.2, 127.7, 127.1, 126.5, 120.9 (q,  $J=286.5$  Hz), 115.9, 111.5, 110.5, 94.3 (q,  $J=31.5$  Hz), 93.5, 63.9, 60.6, 44.9, 13.3. IR  $\nu_{\text{max}}$  (KBr, film,  $\text{cm}^{-1}$ ): 2230, 1764, 1735, 1635, 1481, 1158. HRMS (ESI): calcd for  $\text{C}_{23}\text{H}_{16}\text{BrF}_3\text{N}_2\text{O}_4$   $[\text{M}+\text{H}]^+$  521.0319, found: 521.0318. HPLC analysis [Chiralcel AD, n-hexane/ i-propanol (90:10), 25 °C, 1.0  $\text{mL}\cdot\text{min}^{-1}$ ,  $t_R = 15.6$  min (minor), 24.0 min (major)].

#### Ethyl 1'-benzyl-4-cyano-5'-iodo-2'-oxo-2-(trifluoromethyl)-2H-spiro[furan-3,3'-indoline]-2-carboxylate (4e)

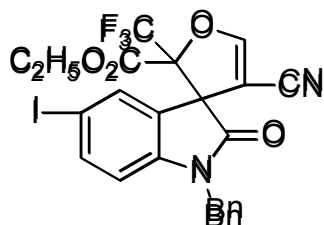

white solid. yield 95%, dr >20:1, ee 97%.  $[\alpha]_D^{20} = +43.8$  ( $c$  1.20,  $\text{CHCl}_3$ ). m.p. 183-185 °C.  $^1\text{H}$  NMR (300 MHz,  $\text{CDCl}_3$ )  $\delta$ : 7.61 (s, 1H), 7.60-7.56 (dd,  $J=8.1$  Hz,  $J=1.5$  Hz, 1H), 7.37-7.28 (m, 6H), 6.50-6.47 (d,  $J=8.4$  Hz, 1H), 5.23-5.18 (d,  $J=15.9$  Hz, 1H), 4.76-4.71 (d,  $J=15.9$  Hz, 1H), 4.04-3.93 (dq,  $J=10.8$  Hz,  $J=7.2$  Hz, 1H), 3.86-3.76 (dq,  $J=10.8$  Hz,  $J=7.2$  Hz, 1H), 0.89-0.84 (t,  $J=7.2$  Hz, 3H).  $^{13}\text{C}$  NMR (75 MHz,  $\text{CDCl}_3$ )  $\delta$ : 167.8, 160.0, 158.8, 141.3, 139.1, 133.0, 132.2, 128.0, 127.1, 126.0, 125.7, 119.8 (q,  $J=285.8$  Hz), 110.9, 109.5, 93.3 (q,  $J=32.3$  Hz), 92.5, 84.2, 62.9, 59.4, 43.8, 12.31. IR  $\nu_{\text{max}}$  (KBr, film,  $\text{cm}^{-1}$ ): 2231, 1767, 1743, 1634, 1480, 1158. HRMS (ESI): calcd for  $\text{C}_{23}\text{H}_{16}\text{F}_3\text{IN}_2\text{O}_4$   $[\text{M}+\text{H}]^+$  569.0179, found: 569.0179. HPLC analysis [Chiralcel AD, n-hexane/ i-propanol (90:10), 25 °C, 1.0  $\text{mL}\cdot\text{min}^{-1}$ ,  $t_R = 18.8$  min (minor), 23.8 min (major)].

#### Ethyl 1'-benzyl-4-cyano-5'-methyl-2'-oxo-2-(trifluoromethyl)-2H-spiro[furan-3,3'-indoline]-2-carboxylate (4f)

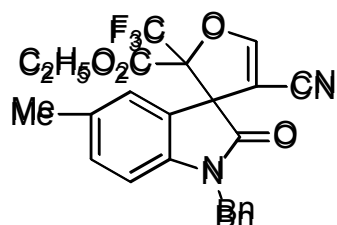

white solid. yield 85%, dr 17:1, ee 94%.  $[\alpha]_D^{20} = +71.8$  ( $c$  0.78,  $\text{CHCl}_3$ ). m.p. 164-166 °C.  $^1\text{H}$  NMR (300 MHz,  $\text{CDCl}_3$ )  $\delta$ : 7.52 (s, 1H), 7.26-7.18 (m, 5H), 6.99-6.96 (d,  $J=7.8$  Hz, 1H), 6.80 (s, 1H), 6.53-6.50 (d,  $J=8.1$  Hz, 1H), 5.19-5.14 (d,  $J=15.6$  Hz, 1H), 4.66-4.60 (d,  $J=15.6$  Hz, 1H), 3.87-3.76 (dq,  $J=10.8$  Hz,  $J=7.2$  Hz, 1H), 3.62-3.52 (dq,  $J=10.8$  Hz,  $J=7.2$  Hz, 1H), 0.66-0.62 (t,  $J=7.2$  Hz, 3H).  $^{13}\text{C}$  NMR (75 MHz,  $\text{CDCl}_3$ )  $\delta$ : 169.5, 161.1, 159.3, 140.2, 134.8, 133.2, 131.6, 128.9, 127.9, 127.1, 125.3, 124.6, 121.0 (q,  $J=286.5$  Hz), 110.9, 109.7, 94.4 (q,  $J=31.5$  Hz), 93.8, 63.5, 60.7, 44.7, 20.9, 13.1. IR  $\nu_{\text{max}}$  (KBr, film,  $\text{cm}^{-1}$ ): 2230, 1764, 1730, 1637, 1499, 1153. HRMS (ESI): calcd for  $\text{C}_{24}\text{H}_{19}\text{F}_3\text{N}_2\text{O}_4$   $[\text{M}+\text{H}]^+$  457.1371, found: 457.1370. HPLC analysis [Chiralcel AD, n-hexane/ i-propanol (90:10), 25 °C, 1.0  $\text{mL}\cdot\text{min}^{-1}$ ,  $t_R = 14.0$  min



(minor), 21.9 min (major)].

**Ethyl 1'-benzyl-4-cyano-5'-methoxy-2'-oxo-2-(trifluoromethyl)-2H-spiro[furan-3,3'-indoline]-2-carboxylate(4g)**

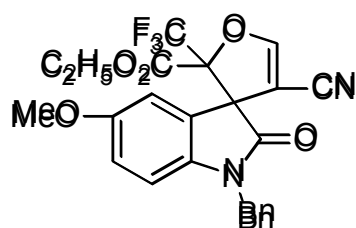

white solid. yield 81%, dr 14:1, ee 97%.  $[\alpha]_D^{20} = +68.4$  (*c* 0.76, CHCl<sub>3</sub>). m.p. 158-160 °C. <sup>1</sup>H NMR (300 MHz, CDCl<sub>3</sub>) δ: 7.60 (s, 1H), 7.32-7.27 (t, 5H), 6.80-6.76 (dd, *J*=8.7Hz, *J*=2.4Hz, 1H), 6.67-6.66 (d, *J*=2.1Hz, 1H), 6.62-6.59 (d, *J*=8.7Hz, 1H), 5.27-5.22 (d, *J*=15.9Hz, 1H), 4.72-4.67 (d, *J*=15.9Hz, 1H), 3.96-3.88 (dq, *J*=10.8Hz, *J*=7.2Hz, 1H), 3.72-3.66 (m, 4H), 0.77-0.73 (t, *J*=7.2Hz, 3H). <sup>13</sup>C NMR (75 MHz, CDCl<sub>3</sub>) δ: 169.2, 161.1, 159.4, 156.4, 135.8, 134.7, 128.9, 128.0, 127.1, 125.6, 121.0 (q, *J*=286.5Hz), 116.0, 111.6, 110.8, 110.5, 94.4 (q, *J*=31.5Hz), 94.1, 63.6, 60.0, 55.9, 44.8, 13.1. IR  $\nu_{\max}$  (KBr, film, cm<sup>-1</sup>): 2228, 1764, 1731, 1626, 1497, 1165. HRMS (ESI): calcd for C<sub>24</sub>H<sub>19</sub>F<sub>3</sub>N<sub>2</sub>O<sub>5</sub> [M+H]<sup>+</sup> 473.1321, found: 473.1319. HPLC analysis [Chiralcel AD, n-hexane/ i-propanol (90:10), 25 °C, 1.3 mL·min<sup>-1</sup>, t<sub>R</sub> = 16.9 min (minor), 52.3 min (major)].

**Ethyl 1'-benzyl-4-cyano-2'-oxo-5'-(trifluoromethoxy)-2-(trifluoromethyl)-2H-spiro[furan-3,3'-indoline]-2-carboxylate(4h)**

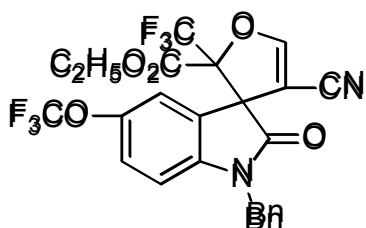

white solid. yield 89%, dr 9:1, ee 96%.  $[\alpha]_D^{20} = +85.7$  (*c* 0.56, CHCl<sub>3</sub>). m.p. 112-114 °C. <sup>1</sup>H NMR (300 MHz, CDCl<sub>3</sub>) δ: 7.63 (s, 1H), 7.38-7.28 (m, 5H), 7.17-7.15 (d, *J*=8.4Hz, 1H), 7.00 (s, 1H), 6.74-6.71 (d, *J*=8.7Hz, 1H), 5.32-5.27 (d, *J*=15.9Hz, 1H), 4.75-4.69 (d, *J*=15.9Hz, 1H), 4.00-3.89 (dq, *J*=10.5Hz, *J*=6.9Hz, 1H), 3.78-3.67 (dq, *J*=10.5Hz, *J*=6.9Hz, 1H), 0.81-0.76 (t, *J*=7.2Hz, 3H). <sup>13</sup>C NMR (75 MHz, CDCl<sub>3</sub>) δ: 169.3, 161.1, 159.9, 144.9, 144.9, 141.3, 134.0, 129.1, 128.2, 127.1, 126.0, 125.5, 125.1, 124.6, 122.7, 122.1, 120.7 (q, *J*=286.5Hz), 120.3 (q, *J*=256.5Hz), 118.7, 94.4 (q, *J*=31.5Hz), 93.4, 63.7, 60.6, 44.9, 13.1. IR  $\nu_{\max}$  (KBr, film, cm<sup>-1</sup>): 2231, 1764, 1745, 1635, 1498, 1152. HRMS (ESI): calcd for C<sub>24</sub>H<sub>16</sub>F<sub>6</sub>N<sub>2</sub>O<sub>5</sub> [M+H]<sup>+</sup> 527.1039, found: 527.1036. HPLC analysis [Chiralcel AD, n-hexane/ i-propanol (90:10), 25 °C, 1.0 mL·min<sup>-1</sup>, t<sub>R</sub> = 10.0 min (minor), 11.8 min (major)].

**Ethyl 1'-benzyl-4-cyano-5'-nitro-2'-oxo-2-(trifluoromethyl)-2H-spiro[furan-3,3'-indoline]-2-carboxylate(4i)**

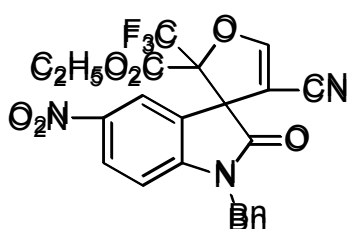

white solid. yield 90%, dr 17:1, ee 96%.  $[\alpha]_D^{20} = +83.6$  (*c* 0.86, CHCl<sub>3</sub>). m.p. 132-134 °C. <sup>1</sup>H NMR (300 MHz, CDCl<sub>3</sub>) δ: 8.26-8.22 (dd, *J*=9.0Hz, *J*=2.4Hz, 1H), 8.00-7.99 (d, *J*=2.1Hz, 1H), 7.70 (s, 1H), 7.39-7.30 (m, 5H), 6.86-6.84 (d, *J*=8.7Hz, 1H), 5.30-5.24 (d, *J*=15.9Hz, 1H), 4.88-4.23 (d, *J*=15.9Hz, 1H),

4.03-3.93 (dq,  $J=10.8\text{Hz}$ ,  $J=7.2\text{Hz}$ , 1H), 3.86-3.75 (dq,  $J=10.8\text{Hz}$ ,  $J=7.2\text{Hz}$ , 1H), 0.92-0.87 (t,  $J = 7.2\text{Hz}$ , 3H).  $^{13}\text{C}$  NMR (75 MHz,  $\text{CDCl}_3$ )  $\delta$ : 169.6, 160.8, 160.6, 148.0, 143.7, 133.4, 129.2, 128.5, 128.1, 127.1, 125.6, 120.8(q,  $J=286.5\text{Hz}$ ), 120.4, 110.2, 109.9, 94.2 (q,  $J=30.0\text{Hz}$ ), 92.9, 64.1, 60.4, 45.2 14.3. IR  $\nu_{\text{max}}$  (KBr, film,  $\text{cm}^{-1}$ ): 2229, 1746, 1621, 1605, 1489, 1335, 1151. HRMS (ESI): calcd for  $\text{C}_{23}\text{H}_{16}\text{F}_3\text{N}_3\text{O}_6$   $[\text{M}+\text{H}]^+$  488.1064, found: 488.1064. HPLC analysis [Chiralcel AD, n-hexane/ i-propanol (90:10),  $25^\circ\text{C}$ ,  $1.0\text{ mL}\cdot\text{min}^{-1}$ ,  $t_{\text{R}} = 35.4\text{ min}$  (minor),  $40.8\text{ min}$  (major)].

**Ethyl 1'-benzyl-4-cyano-5',7'-dimethyl-2'-oxo-2-(trifluoromethyl)-2H-spiro[furan-3,3'-indoline]-2-carboxylate(4j)**

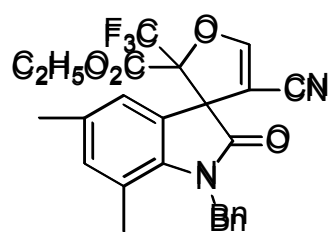

white solid. yield 95%, dr >20:1, ee 96%.  $[\alpha]_{\text{D}}^{20} = +74.5$  ( $c$  0.94,  $\text{CHCl}_3$ ). m.p.  $138-140^\circ\text{C}$ .  $^1\text{H}$  NMR (300 MHz,  $\text{CDCl}_3$ )  $\delta$ : 7.57 (s, 1H), 7.35-7.21 (m, 5H), 6.85 (s, 1H), 6.74 (s, 1H), 5.41-5.35 (d,  $J=17.1\text{Hz}$ , 1H), 5.12-5.07 (d,  $J=17.1\text{Hz}$ , 1H), 4.74-4.69 (d,  $J = 15.9\text{Hz}$ , 1H), 4.03-3.92 (dq,  $J=10.5\text{Hz}$ ,  $J=7.2\text{Hz}$ , 1H), 3.82-3.71 (dq,  $J=10.5\text{Hz}$ ,  $J=7.2\text{Hz}$ , 1H), 2.24 (s, 1H), 2.20 (s, 1H), 0.92-0.87 (t,  $J = 7.2\text{Hz}$ , 3H).  $^{13}\text{C}$  NMR (75 MHz,  $\text{CDCl}_3$ )  $\delta$ : 170.5, 161.2, 159.1, 138.2, 136.5, 135.7, 133.1, 128.9, 127.4, 125.5, 125.4, 123.2, 121.0(q,  $J=285.7\text{Hz}$ ), 120.4, 111.0, 94.6 (q,  $J=30.7\text{Hz}$ ), 94.6, 63.6, 60.4, 45.9, 20.6, 18.4, 13.3. IR  $\nu_{\text{max}}$  (KBr, film,  $\text{cm}^{-1}$ ): 2227, 1765, 1743, 1638, 1482, 1162. HRMS (ESI): calcd for  $\text{C}_{25}\text{H}_{21}\text{F}_3\text{N}_2\text{O}_4$   $[\text{M}+\text{H}]^+$  471.1529, found: 471.1526. HPLC analysis [Chiralcel AD, n-hexane/ i-propanol (90:10),  $25^\circ\text{C}$ ,  $1.0\text{ mL}\cdot\text{min}^{-1}$ ,  $t_{\text{R}} = 33.7\text{ min}$  (minor),  $52.5\text{ min}$  (major)]

**Ethyl 1'-benzyl-4-cyano-7'-fluoro-2'-oxo-2-(trifluoromethyl)-2H-spiro[furan-3,3'-indoline]-2-carboxylate(4k)**

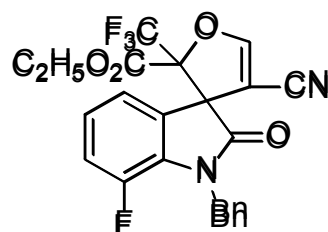

white solid. yield 76%, dr >20:1, ee 98%.  $[\alpha]_{\text{D}}^{20} = +73.1$  ( $c$  0.70,  $\text{CHCl}_3$ ). m.p.  $150-152^\circ\text{C}$ .  $^1\text{H}$  NMR (300 MHz,  $\text{CDCl}_3$ )  $\delta$ : 7.59 (s, 1H), 7.37-7.26 (m, 5H), 7.10-6.97 (m, 2H), 6.89-6.86 (dd,  $J=7.2\text{Hz}$ ,  $J=1.2\text{Hz}$ , 1H), 5.28-5.23 (d,  $J=15.3\text{Hz}$ , 1H), 4.74-4.69 (d,  $J = 15.3\text{Hz}$ , 1H), 3.95-3.84 (dq,  $J=10.5\text{Hz}$ ,  $J=7.2\text{Hz}$ , 1H), 3.72-3.61 (dq,  $J=10.5\text{Hz}$ ,  $J=7.2\text{Hz}$ , 1H), 0.72-0.67 (t,  $J = 7.2\text{Hz}$ , 3H).  $^{13}\text{C}$  NMR (75 MHz,  $\text{CDCl}_3$ )  $\delta$ : 169.2, 160.8, 159.6, 147.1 (d,  $J=254.3\text{Hz}$ ), 135.8, 129.4 (d,  $J=9.8\text{Hz}$ ), 128.7, 127.9, 127.3 (d,  $J=3.3\text{Hz}$ ), 127.3, 124.2 (d,  $J=6.0\text{Hz}$ ), 120.9(q,  $J=287.3\text{Hz}$ ), 120.6 (d,  $J=3.8\text{Hz}$ ), 119.5 (d,  $J=19.5\text{Hz}$ ), 110.5, 94.5 (q,  $J=31.5\text{Hz}$ ), 93.9, 63.7, 60.7 (d,  $J=2.3\text{Hz}$ ), 46.3 (d,  $J=4.5\text{Hz}$ ), 13.1. IR  $\nu_{\text{max}}$  (KBr, film,  $\text{cm}^{-1}$ ): 2227, 1769, 1724, 1635, 1488, 1153. HRMS (ESI): calcd for  $\text{C}_{23}\text{H}_{16}\text{F}_4\text{N}_2\text{O}_4$   $[\text{M}+\text{H}]^+$  461.1120, found: 461.1119. HPLC analysis [Chiralcel AD, n-hexane/ i-propanol (90:10),  $25^\circ\text{C}$ ,  $1.0\text{ mL}\cdot\text{min}^{-1}$ ,  $t_{\text{R}} = 14.4\text{ min}$  (minor),  $25.9\text{ min}$  (major)]

**Ethyl-1'-benzyl-7'-bromo-4-cyano-2'-oxo-2-(trifluoromethyl)-2H-spiro[furan-3,3'-indoline]-2-carboxylate(4l)**



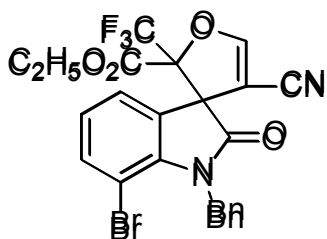

white solid. yield 89%, dr >20:1, ee 99%.  $[\alpha]_D^{20} = +72.9$  ( $c$  0.92,  $\text{CHCl}_3$ ). m.p. 137-139 °C.  $^1\text{H}$  NMR (300 MHz,  $\text{CDCl}_3$ )  $\delta$ : 7.61 (s, 1H), 7.48-7.45 (dd,  $J=8.1\text{Hz}$ ,  $J=1.2\text{Hz}$ , 1H), 7.35-7.23 (m, 5H), 7.05-7.02 (dd,  $J=7.5\text{Hz}$ ,  $J=1.2\text{Hz}$ , 1H), 6.97-6.92 (t,  $J=7.8\text{Hz}$ , 1H), 5.54-5.49 (d,  $J=16.8\text{Hz}$ , 1H), 5.46-5.41 (d,  $J=16.8\text{Hz}$ , 1H), 4.03-3.92 (dq,  $J=10.8\text{Hz}$ ,  $J=7.2\text{Hz}$ , 1H), 3.81-3.70 (dq,  $J=10.8\text{Hz}$ ,  $J=7.2\text{Hz}$ , 1H), 0.92-0.88 (t,  $J=7.2\text{Hz}$ , 3H).  $^{13}\text{C}$  NMR (75 MHz,  $\text{CDCl}_3$ )  $\delta$ : 170.3, 160.8, 159.6, 140.4, 137.3, 136.2, 128.7, 127.8, 127.4, 126.5, 126.1, 124.5, 123.8, 120.8 (q,  $J=287.3\text{Hz}$ ), 110.5, 103.0, 94.8 (q,  $J=31.5\text{Hz}$ ), 94.8, 63.9, 60.3, 45.6, 13.4. IR  $\nu_{\text{max}}$  (KBr, film,  $\text{cm}^{-1}$ ): 2232, 1774, 1734, 1636, 1464, 1153. HRMS (ESI): calcd for  $\text{C}_{23}\text{H}_{16}\text{BrF}_3\text{N}_2\text{O}_4$   $[\text{M}+\text{H}]^+$  521.0324, found: 521.0328. HPLC analysis [Chiralcel AD, n-hexane/ i-propanol (90:10), 25 °C, 1.0  $\text{mL}\cdot\text{min}^{-1}$ ,  $t_R = 15.2$  min (minor), 51.5 min (major)].

#### Ethyl 4-cyano-1'-methyl-2'-oxo-2-(trifluoromethyl)-2H-spiro[furan-3,3'-indoline]-2-carboxylate (4m)

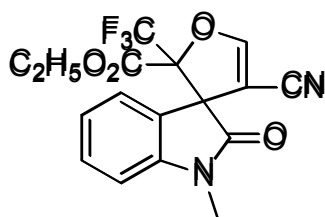

white solid. yield 89%, dr 10:1, ee 98%.  $[\alpha]_D^{20} = +113.0$  ( $c$  0.66,  $\text{CHCl}_3$ ). m.p. 169-171 °C.  $^1\text{H}$  NMR (300 MHz,  $\text{CDCl}_3$ )  $\delta$ : 7.53 (s, 1H), 7.37-7.32 (m, 1H), 7.05-6.98 (m, 2H), 6.83-6.81 (d,  $J=7.8\text{Hz}$ , 1H), 3.93-3.82 (dq,  $J=10.2\text{Hz}$ ,  $J=7.2\text{Hz}$ , 1H), 3.68-3.57 (dq,  $J=10.2\text{Hz}$ ,  $J=7.2\text{Hz}$ , 1H), 3.22 (s, 1H), 0.81-0.77 (t,  $J=7.2\text{Hz}$ , 3H).  $^{13}\text{C}$  NMR (75 MHz,  $\text{CDCl}_3$ )  $\delta$ : 169.5, 161.1, 159.6, 143.6, 124.6, 124.1, 123.3, 120.9 (q,  $J=285.8\text{Hz}$ ), 110.7, 108.8, 94.3 (q,  $J=32.3\text{Hz}$ ), 93.6, 63.5, 60.8, 27.3, 13.2. IR  $\nu_{\text{max}}$  (KBr, film,  $\text{cm}^{-1}$ ): 2232, 1761, 1726, 1639, 1472, 1151. HRMS (ESI): calcd for  $\text{C}_{17}\text{H}_{13}\text{F}_3\text{N}_2\text{O}_4$   $[\text{M}+\text{H}]^+$  367.0903, found: 367.0900. HPLC analysis [Chiralcel AD, n-hexane/ i-propanol (90:10), 25 °C, 1.0  $\text{mL}\cdot\text{min}^{-1}$ ,  $t_R = 21.1$  min (minor), 22.4 min (major)].

#### Methyl 1'-benzyl-4-cyano-2'-oxo-2-(trifluoromethyl)-2H-spiro[furan-3,3'-indoline]-2-carboxylate (4n)

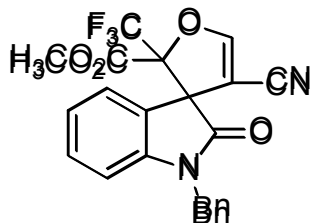

white solid. yield 85%, dr 12:1, ee 95%.  $[\alpha]_D^{20} = +112.0$  ( $c$  0.70,  $\text{CHCl}_3$ ). m.p. 156-158 °C.  $^1\text{H}$  NMR (300 MHz,  $\text{CDCl}_3$ )  $\delta$ : 7.52 (s, 1H), 7.27-7.15 (m, 6H), 6.98 (s, 1H), 6.96 (s, 1H), 6.64-6.62 (d,  $J=7.8\text{Hz}$ , 1H), 5.18-5.13 (d,  $J=15.9\text{Hz}$ , 1H), 4.74-4.69 (d,  $J=15.9\text{Hz}$ , 1H), 3.19 (s, 3H).  $^{13}\text{C}$  NMR (75 MHz,  $\text{CDCl}_3$ )  $\delta$ : 168.4, 160.6, 158.5, 141.5, 133.5, 130.4, 127.9, 126.9, 126.0, 123.4, 123.4, 122.3, 119.9 (q,  $J=286.5\text{Hz}$ ), 109.7, 109.0, 93.6 (q,  $J=31.5\text{Hz}$ ), 92.8, 59.8, 52.5, 43.7. IR  $\nu_{\text{max}}$  (KBr, film,  $\text{cm}^{-1}$ ): 2236, 1771, 1739, 1636, 1489, 1226, 1155. HRMS (ESI): calcd for  $\text{C}_{22}\text{H}_{15}\text{F}_3\text{N}_2\text{O}_4$   $[\text{M}+\text{H}]^+$  429.1060, found: 429.1057. HPLC analysis [Chiralcel AD, n-hexane/ i-propanol (90:10), 25 °C, 1.0  $\text{mL}\cdot\text{min}^{-1}$ ,  $t_R = 19.8$  min (minor), 31.8 min (major)].

**Diethyl-1'-benzyl-4-cyano-2'-oxo-2H-spiro[furan-3,3'-indoline]-2,2-dicarboxylate (4o)**

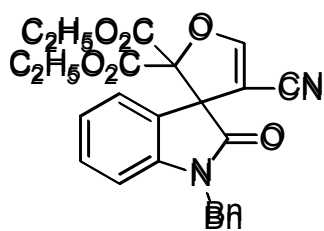

white solid. yield 99%, ee 94%.  $[\alpha]_D^{20} = +35.6$  (*c* 0.90, CHCl<sub>3</sub>). m.p. 118-120 °C. <sup>1</sup>H NMR (300 MHz, CDCl<sub>3</sub>)  $\delta$ : 7.62 (s, 1H), 7.35-7.23 (m, 6H), 7.13-7.10 (d, *J* = 7.2 Hz, 1H), 7.06-7.01 (t, *J* = 7.5 Hz, 1H), 6.74-6.72 (d, *J* = 7.8 Hz, 1H), 5.08-5.03 (d, *J* = 15.9 Hz, 1H), 4.93-4.88 (d, *J* = 15.9 Hz, 1H), 4.38-4.19 (m, 1H), 4.14-4.03 (dq, *J* = 10.7 Hz, *J* = 7.2 Hz, 1H), 3.97-3.87 (dq, *J* = 10.7 Hz, *J* = 7.2 Hz, 1H), 1.28-1.23 (t, *J* = 7.2 Hz, 3H), 0.94-0.89 (t, *J* = 7.2 Hz, 3H). <sup>13</sup>C NMR (75 MHz, CDCl<sub>3</sub>)  $\delta$ : 172.4, 163.4, 163.0, 143.1, 134.7, 130.8, 128.9, 127.8, 127.1, 124.2, 123.4, 111.5, 110.2, 95.3, 93.6, 63.5, 63.1, 62.3, 44.5, 13.8, 13.5. IR  $\nu_{\max}$  (KBr, film, cm<sup>-1</sup>): 2224, 1751, 1719, 1621, 1469, 1163. HRMS (ESI): calcd for C<sub>25</sub>H<sub>22</sub>N<sub>2</sub>O<sub>6</sub> [M+H]<sup>+</sup> 447.1152, found: 447.1151. HPLC analysis [Chiralcel AD, n-hexane/ i-propanol (90:10), 25 °C, 1.2 mL·min<sup>-1</sup>, t<sub>R</sub> = 40.4 min (minor), 62.6 min (major)].

## 6. The procedure for the reduction of product 4a

Under N<sub>2</sub> at 0 °C, to **4a** (0.1 mmol) and LiBH<sub>4</sub> (0.4 mmol) was added dry THF (2 ml) and dry ethanol (0.1 mmol). After 10 min, the temperature was allowed to room temperature and the mixture was stirring for overnight. One equivalent of water was added and the mixture was concentrated and extracted with DCM. The organic phase was dried over Na<sub>2</sub>SO<sub>4</sub>, filtered and concentrated in vacuo. The residue was purified by column chromatography over silica gel (gradient: petroleum ether / EtOAc = 6:1) to afford the desired product **5**.

**1'-benzyl-2-(hydroxymethyl)-2'-oxo-2-(trifluoromethyl)-4,5-dihydro-2H-spiro[furan-3,3'-indoline]-4-carbonitrile (5)**

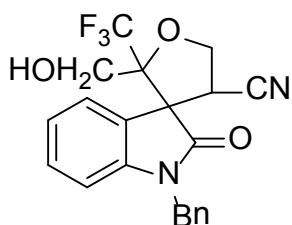

white solid. yield 45%, 96% ee.  $[\alpha]_D^{20} = +90.6$  (*c* 0.27, CHCl<sub>3</sub>). m.p. 131-132 °C. <sup>1</sup>H NMR (300 MHz, DMSO)  $\delta$ : 7.82-7.80 (d, *J* = 7.2 Hz, 1H), 7.39-7.31 (m, 6H), 7.18-7.13 (t, *J* = 7.3 Hz, 1H), 6.97-6.94 (d, *J* = 7.7 Hz, 1H), 6.28-6.24 (t, *J* = 5.3 Hz, 1H), 4.97 (s, 2H), 4.79-4.60 (m, 3H), 3.86-3.80 (dd, *J* = 11.6 Hz, *J* = 5.0 Hz, 1H), 3.71-3.66 (dd, *J* = 11.6 Hz, *J* = 5.0 Hz, 1H). <sup>13</sup>C NMR (75 MHz, DMSO)  $\delta$ : 172.3, 143.4, 135.5, 130.2, 128.5, 127.5, 127.4, 125.9, 123.7 (q, *J* = 257 Hz), 123.1, 122.2, 116.7, 109.7, 88.1 (q, *J* = 88.1 Hz), 69.8, 61.9, 59.7, 43.1, 37.8. IR  $\nu_{\max}$  (KBr, film, cm<sup>-1</sup>): 1710, 1698, 1470, 1337, 1162, 762. HRMS (ESI): calcd for C<sub>21</sub>H<sub>18</sub>N<sub>2</sub>O<sub>3</sub>F<sub>3</sub> [M+H]<sup>+</sup> 403.1264, found: 403.1262. HPLC analysis [Chiralcel AD, n-hexane/ i-propanol (90:10), 25 °C, 0.8 mL·min<sup>-1</sup>, t<sub>R</sub> = 15.6 min (minor), 25.1 min (major)].

## 7. Plausible catalytic transitional state

The N-allylic ylide intermediate could be stabilized by electron-withdraw cyano group. The *Si*-face of the 1, 3-dipole would be well blocked by quinoline moiety and naphthyl ring of the catalyst, resulting in the approach of trifluoropyruvate to the N-allylic ylide from *Re*-face (**I** and **III**). In addition, because of steric hindrance between quinuclidine cycle of the catalyst and ester group of trifluoropyruvate, transition state **III** is also unfavored. The group at C-6' position played an important role in stereoselective control. Steric hinder 1-naphthyl group at C-6' position may improve the steric hindrance between ester group of trifluoropyruvate and quinuclidine cycle of the catalyst resulting in the increase of diastereoselectivity

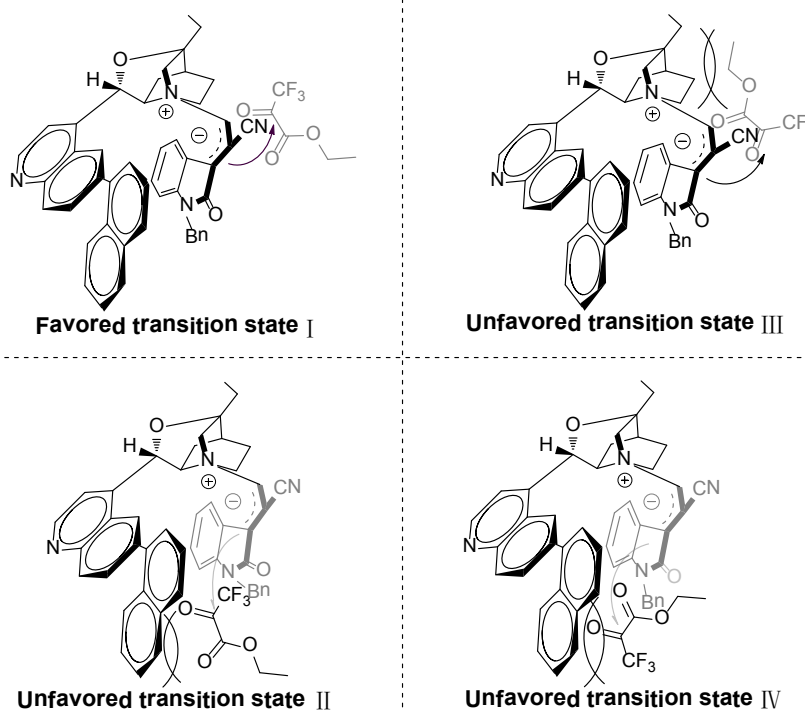

Unfavored transition state **II**: Steric hindrance between trifluoropyruvate and the aryl of the catalyst

Unfavored transition state **III**: Steric hindrance between ester group of trifluoropyruvate and quinuclidine cycle of the catalyst

Unfavored transition state **IV**: Steric hindrance between trifluoropyruvate and the aryl of the catalyst

## 8. X-ray crystallography of **4l** compound

Crystals of **4l** suitable for X-ray analysis were obtained from ether (CCDC 934201)

The molecular structure of the annulation product **4l** was further confirmed by X-ray crystallographic analysis, which showed that the absolute configurations of two newly created chiral centers were (*S*, *S*).

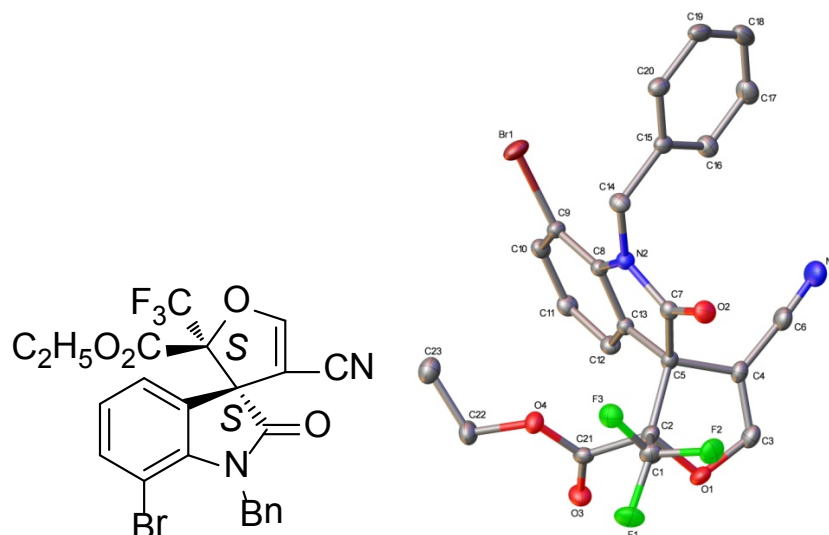

|                                 |                                                                                             |
|---------------------------------|---------------------------------------------------------------------------------------------|
| Identification code             | <b>a</b>                                                                                    |
| Empirical formula               | C <sub>23</sub> H <sub>16</sub> Br F <sub>3</sub> N <sub>2</sub> O <sub>4</sub>             |
| Formula weight                  | 521.29                                                                                      |
| Temperature                     | 173(2) K                                                                                    |
| Wavelength                      | 0.71073 Å                                                                                   |
| Crystal system, space group     | Orthorhombic, P2(1)2(1)2(1)                                                                 |
| Unit cell dimensions            | a = 8.0616(16) Å<br>b = 10.147(2) Å    beta = 90 deg.<br>c = 26.551(5) Å    gamma = 90 deg. |
| Volume                          | 2171.8(7) Å <sup>3</sup>                                                                    |
| Z, Calculated density           | 4, 1.594 Mg/m <sup>3</sup>                                                                  |
| Absorption coefficient          | 1.952 mm <sup>-1</sup>                                                                      |
| F(000)                          | 1048                                                                                        |
| Crystal size                    | 0.46 x 0.34 x 0.32 mm                                                                       |
| Theta range for data collection | 3.05 to 27.47 deg.                                                                          |
| Limiting indices                | -10 ≤ h ≤ 10, -12 ≤ k ≤ 13, -34 ≤ l ≤ 32                                                    |
| Reflections collected / unique  | 14343 / 4940 [R(int) = 0.0379]                                                              |
| Completeness to theta = 27.47   | 99.5 %                                                                                      |
| Absorption correction           | Semi-empirical from equivalents                                                             |
| Max. and min. transmission      | 1.0000 and 0.6779                                                                           |

Refinement method Full-matrix least-squares on  $F^2$   
Data / restraints / parameters 4940 / 0 / 299  
Goodness-of-fit on  $F^2$  1.088  
Final R indices [ $I > 2\sigma(I)$ ] R1 = 0.0346, wR2 = 0.0741  
R indices (all data) R1 = 0.0383, wR2 = 0.0759  
Absolute structure parameter 0.000(7)  
Largest diff. peak and hole 0.393 and -0.409 e.Å<sup>-3</sup>

## 9. NMR Spectra

### 9.1 NMR Spectra of Substrates

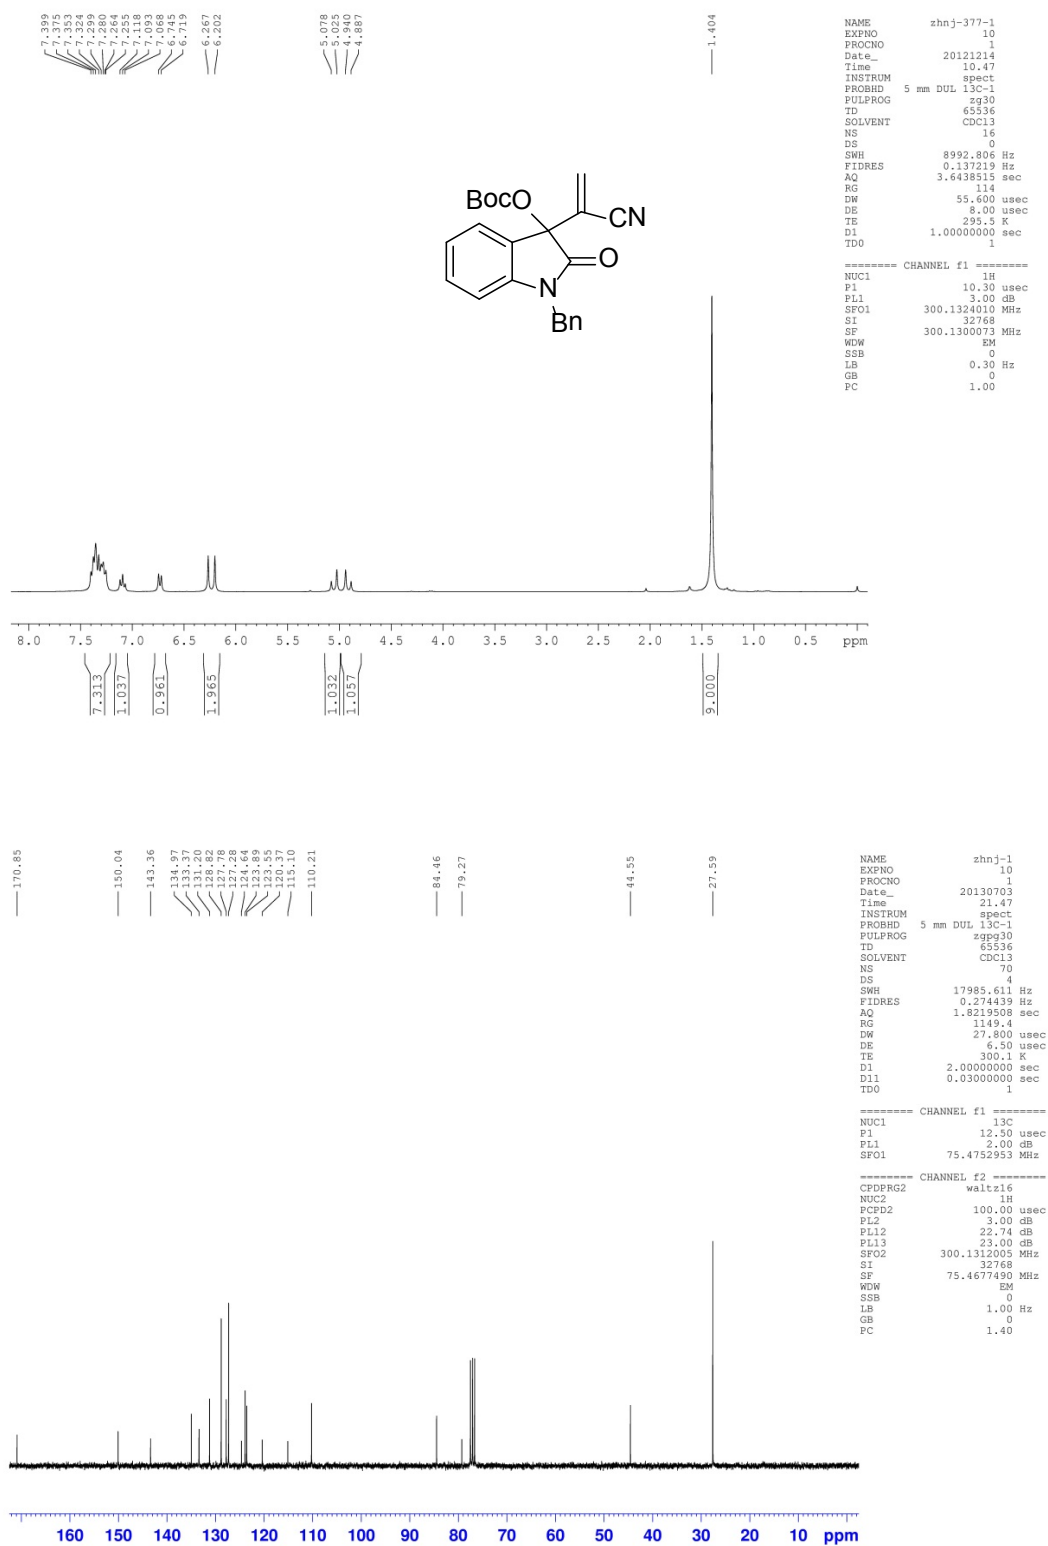

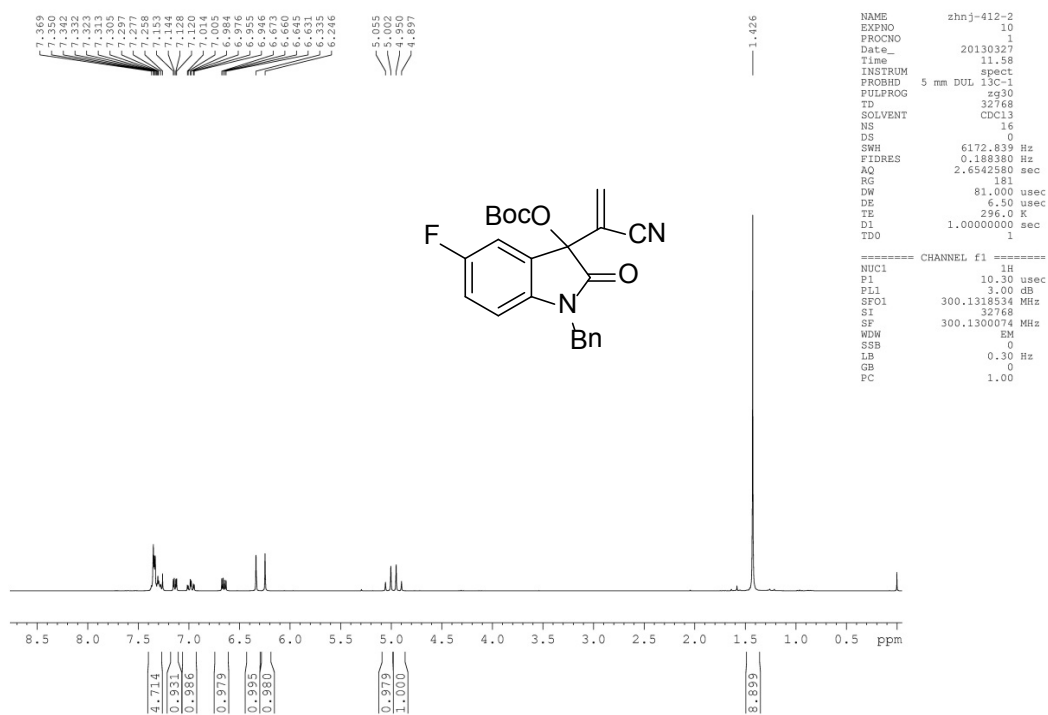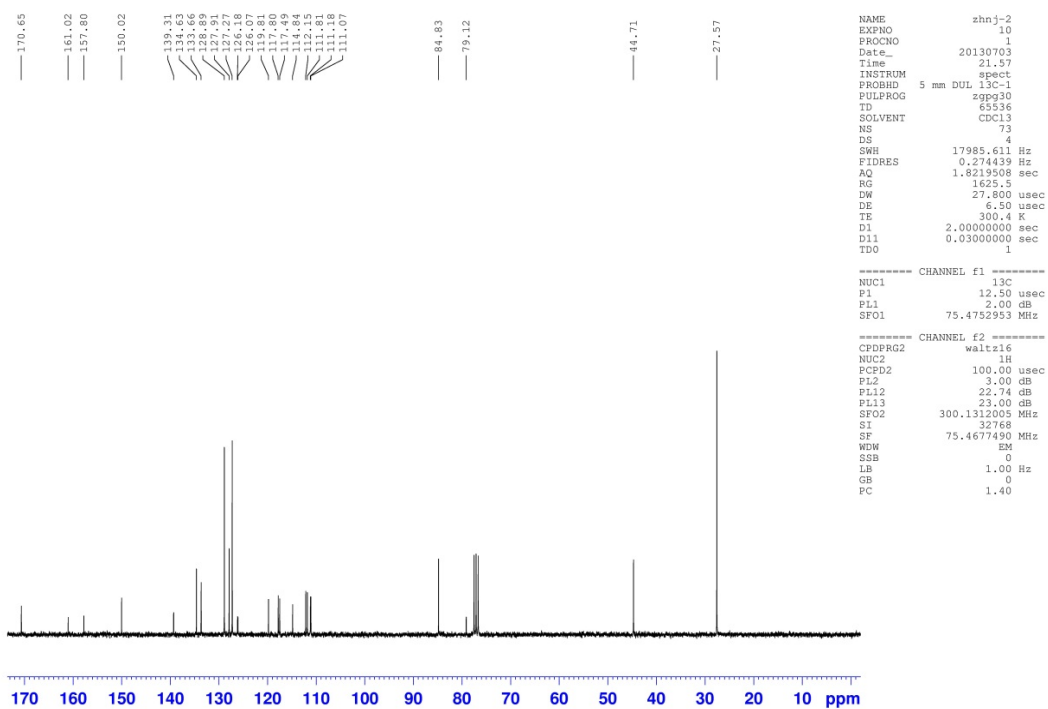

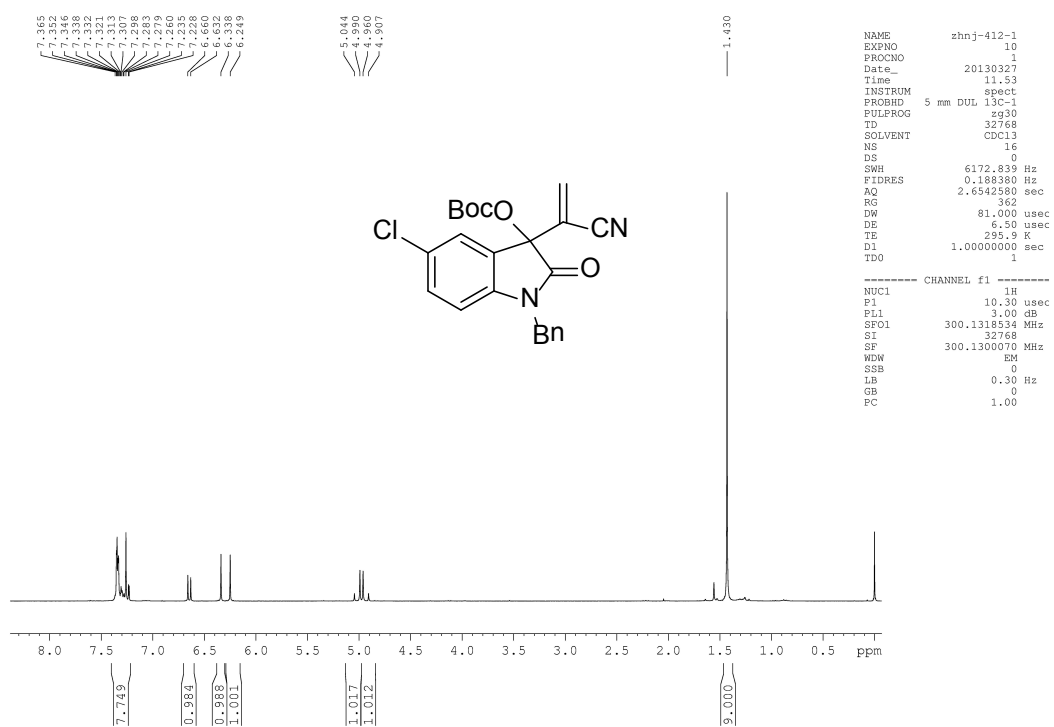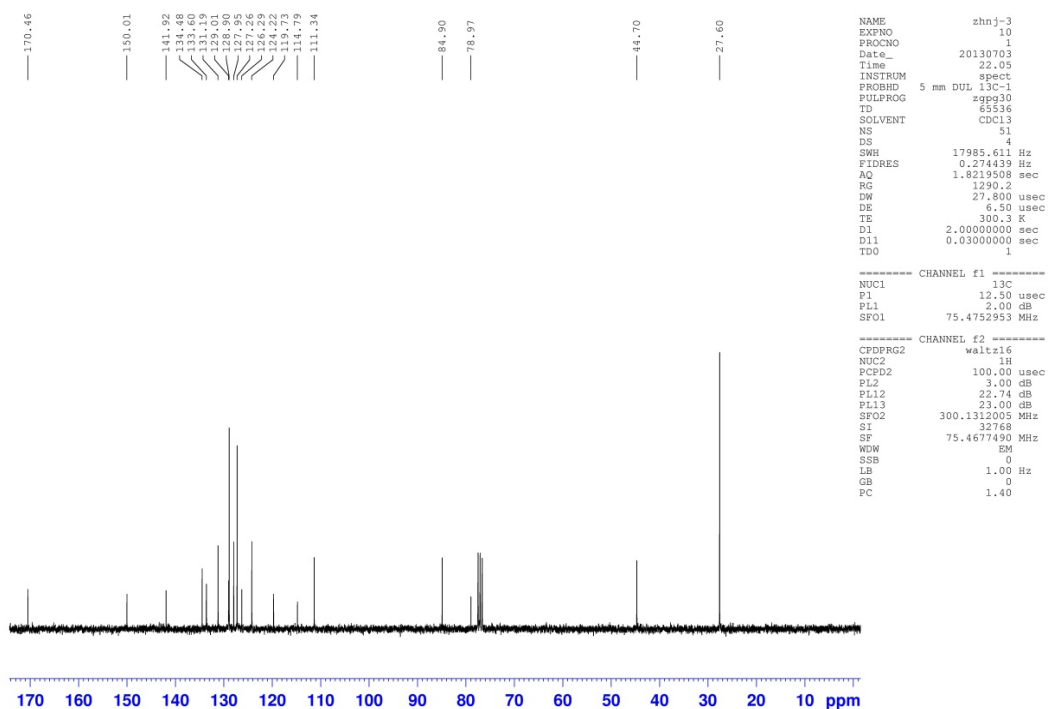



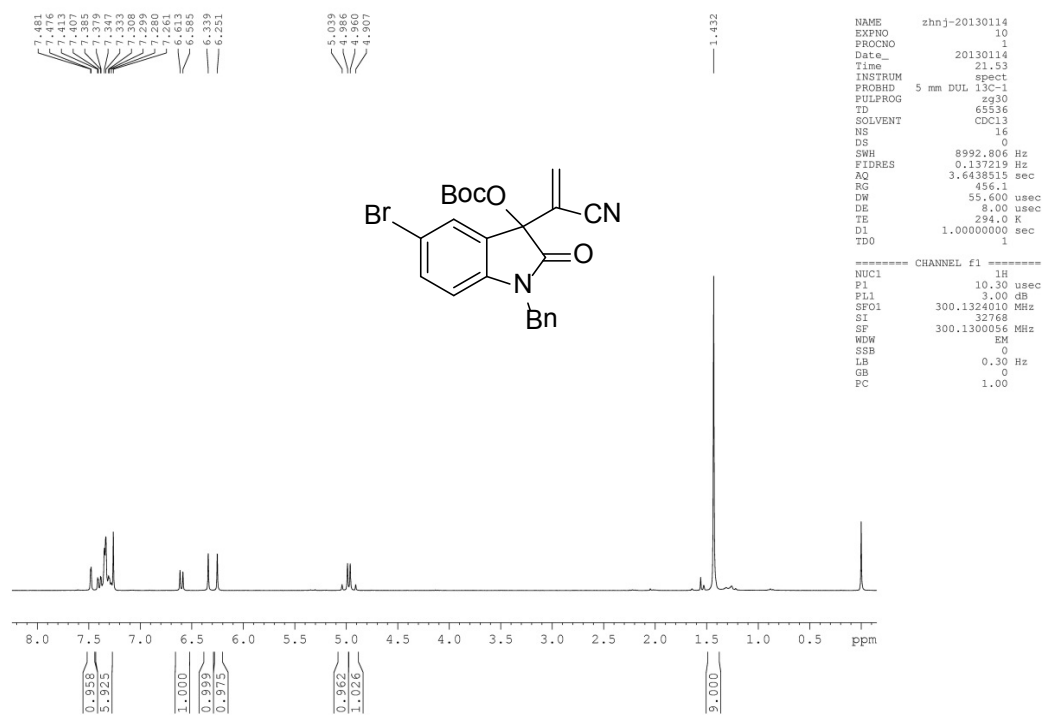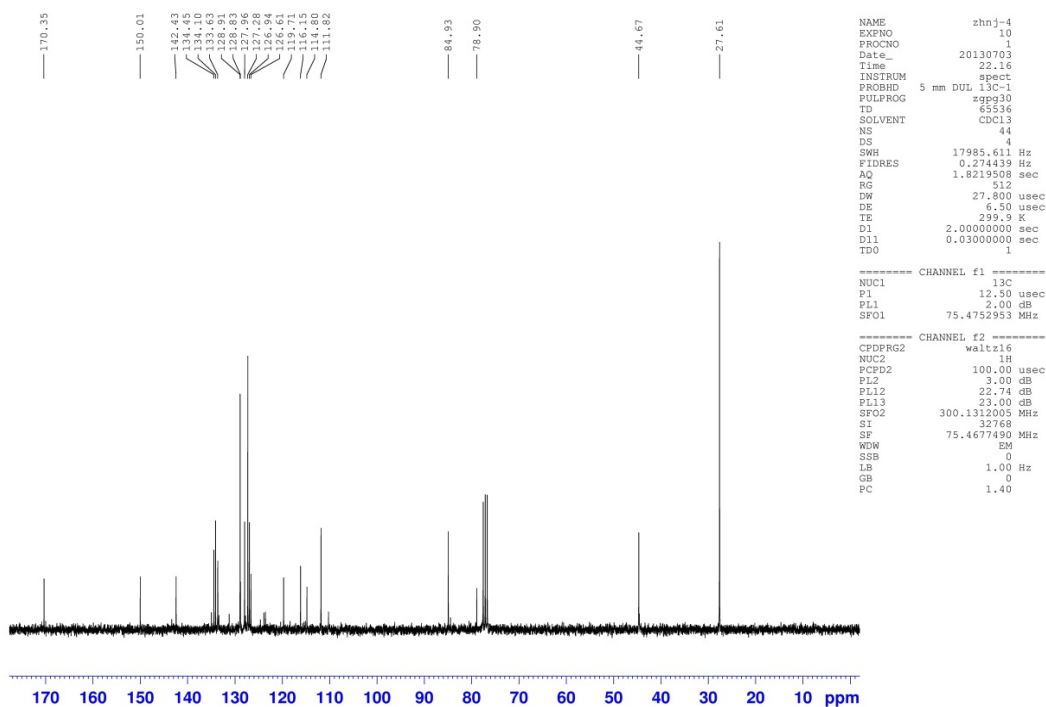

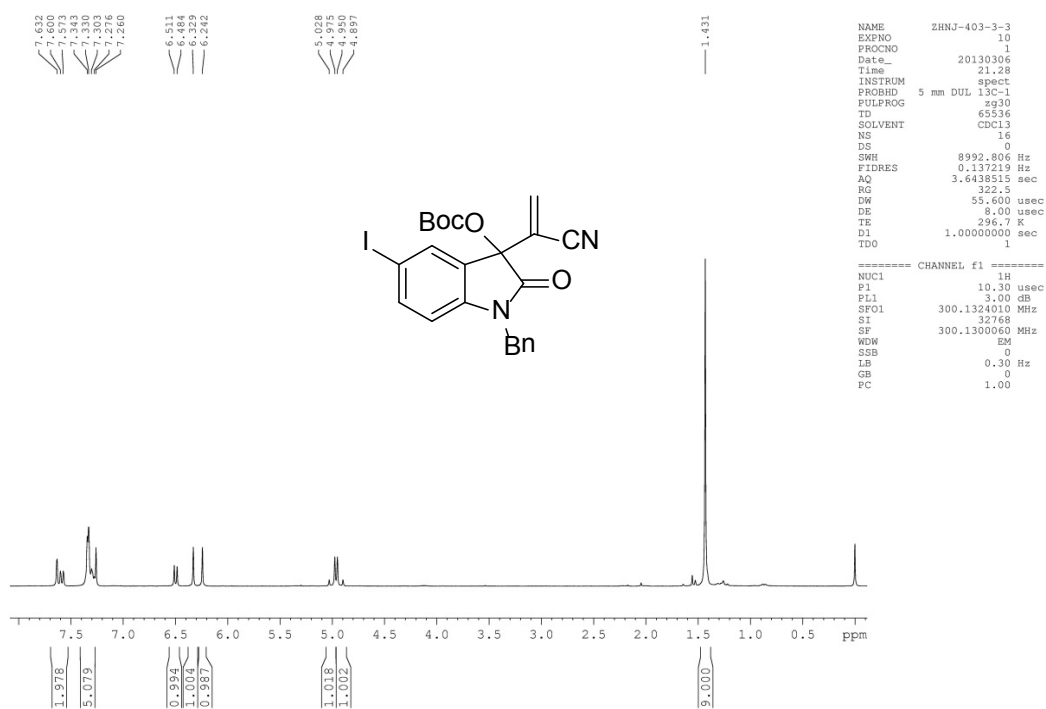

```

NAME      ZHNJ-403-3-3
EXPNO    10
PROCNO   1
Date_    20130306
Time     21.28
INSTRUM  spect
PROBHD   5 mm DUL 13C-1
PULPROG  zg30
TD       65536
SOLVENT  CDCl3
NS       16
DS       0
SWH      8992.806 Hz
FIDRES   0.137219 Hz
AQ       3.6438515 sec
RG       322.5
DW       55.600 usec
DE       8.00 usec
TE       296.7 K
D1       1.00000000 sec
TDO      1

===== CHANNEL f1 =====
NUC1     1H
P1       10.30 usec
PL1     3.00 dB
SFO1    300.1324010 MHz
SI       32768
SF       300.1300060 MHz
WDW      EM
SSB      0
LB       0.30 Hz
GB       0
PC       1.00
    
```

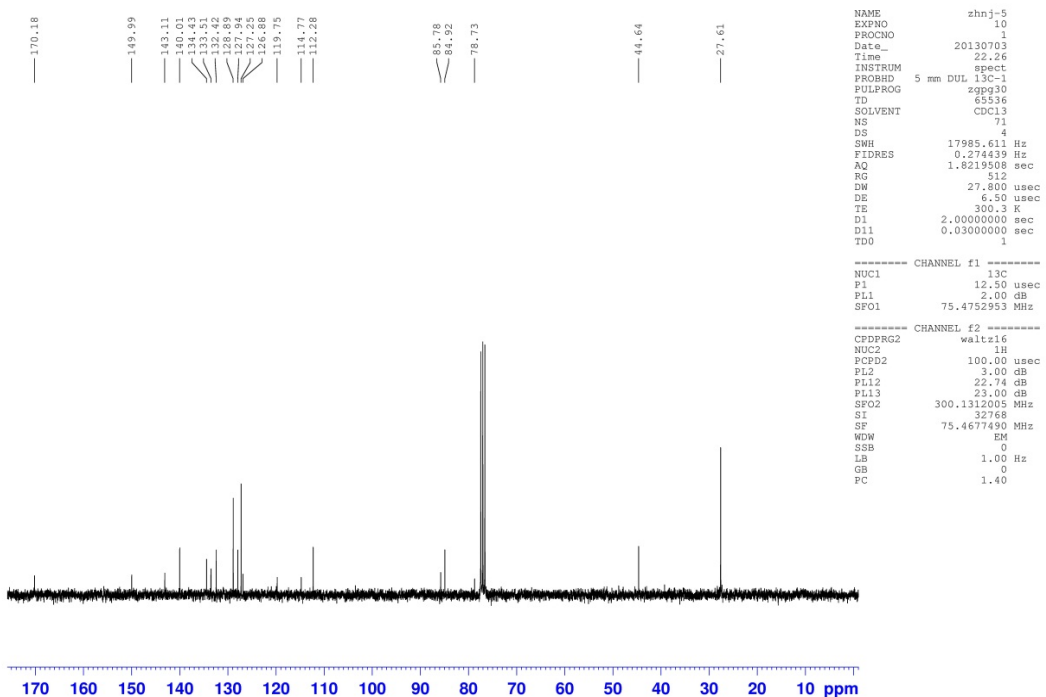

```

NAME      zhnj-5
EXPNO    10
PROCNO   1
Date_    20130703
Time     22.26
INSTRUM  spect
PROBHD   5 mm DUL 13C-1
PULPROG  zgpg30
TD       65536
SOLVENT  CDCl3
NS       71
DS       4
SWH      17985.611 Hz
FIDRES   0.274439 Hz
AQ       1.8219508 sec
RG       512
DW       27.800 usec
DE       6.50 usec
TE       300.3 K
D1       2.00000000 sec
D11     0.03000000 sec
TDO      1

===== CHANNEL f1 =====
NUC1     13C
P1       12.50 usec
PL1     2.00 dB
SFO1    75.4752953 MHz

===== CHANNEL f2 =====
CPDPRG2  waltz16
NUC2     1H
PCPD2    100.00 usec
PL2     3.00 dB
PL12    22.74 dB
PL13    23.00 dB
SFO2    300.1312005 MHz
SI       32768
SF       75.4677490 MHz
WDW      EM
SSB      0
LB       1.00 Hz
GB       0
PC       1.40
    
```

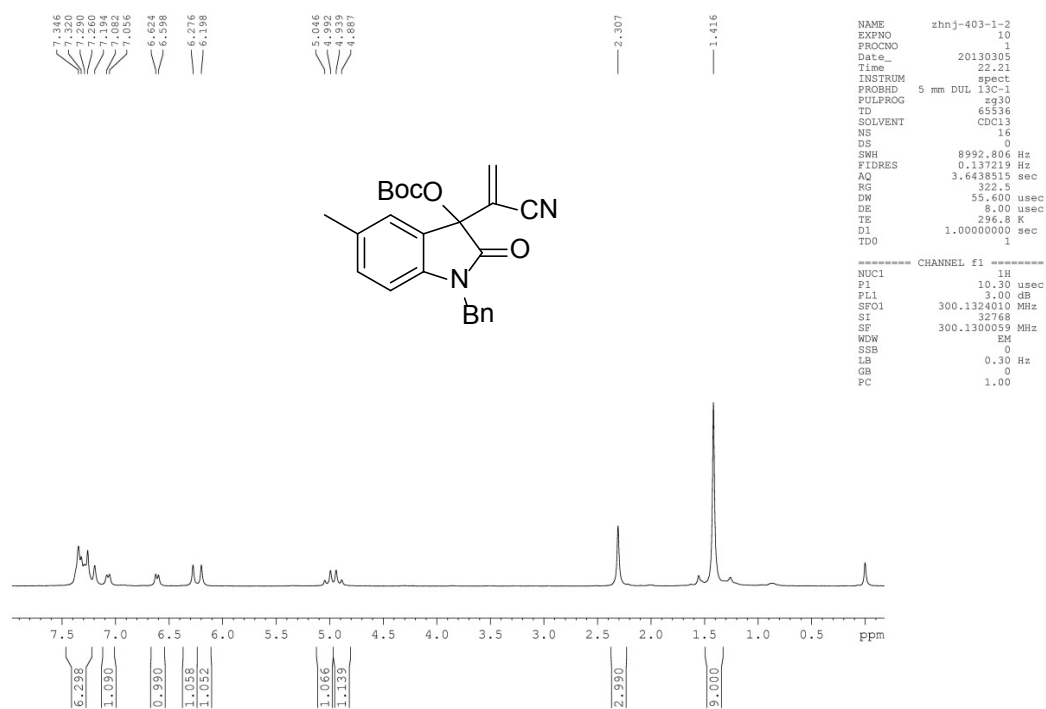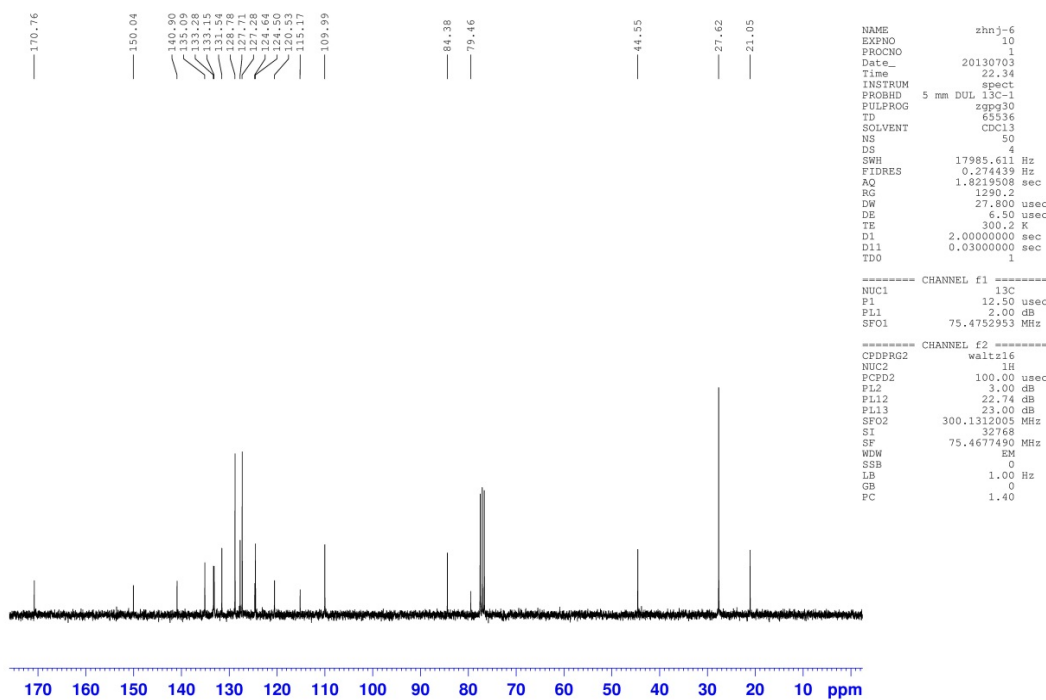

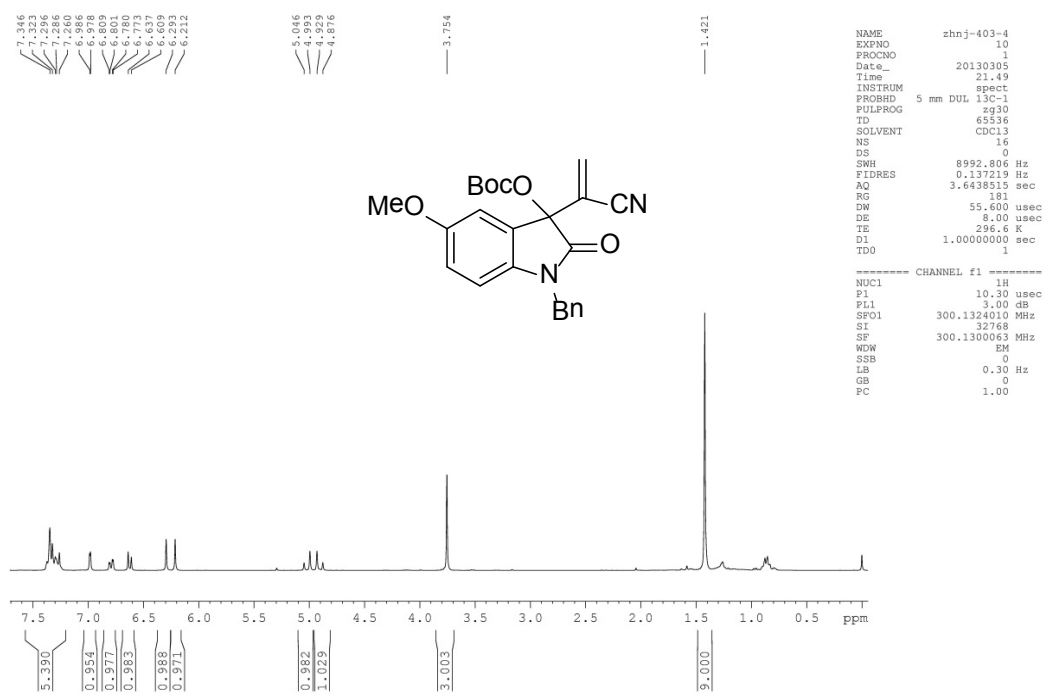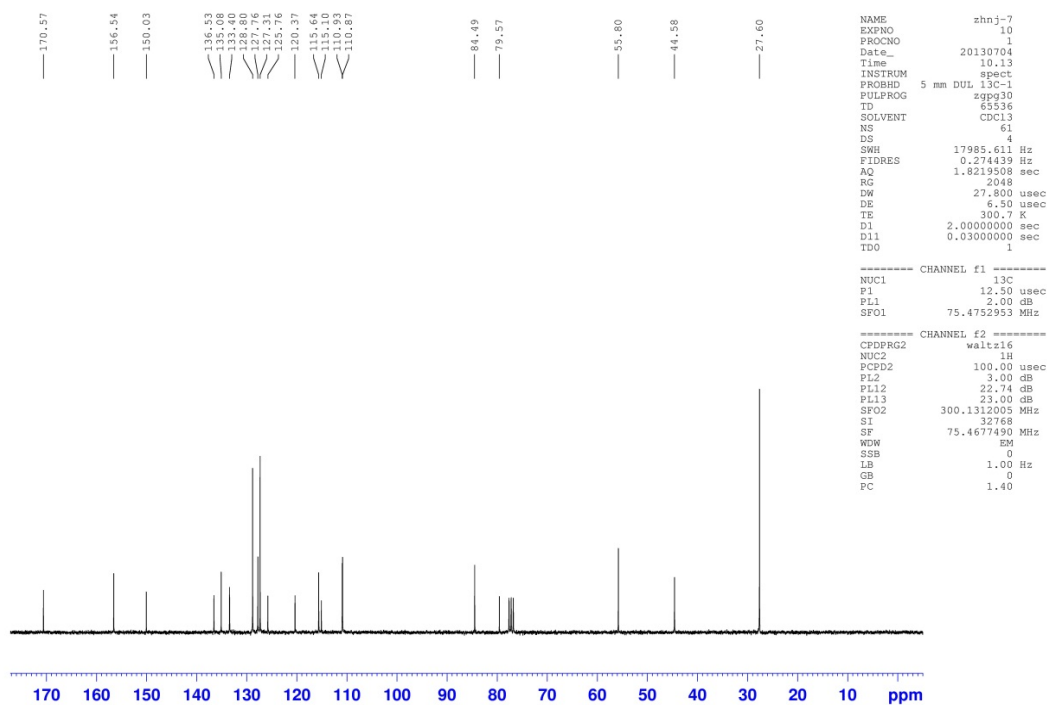

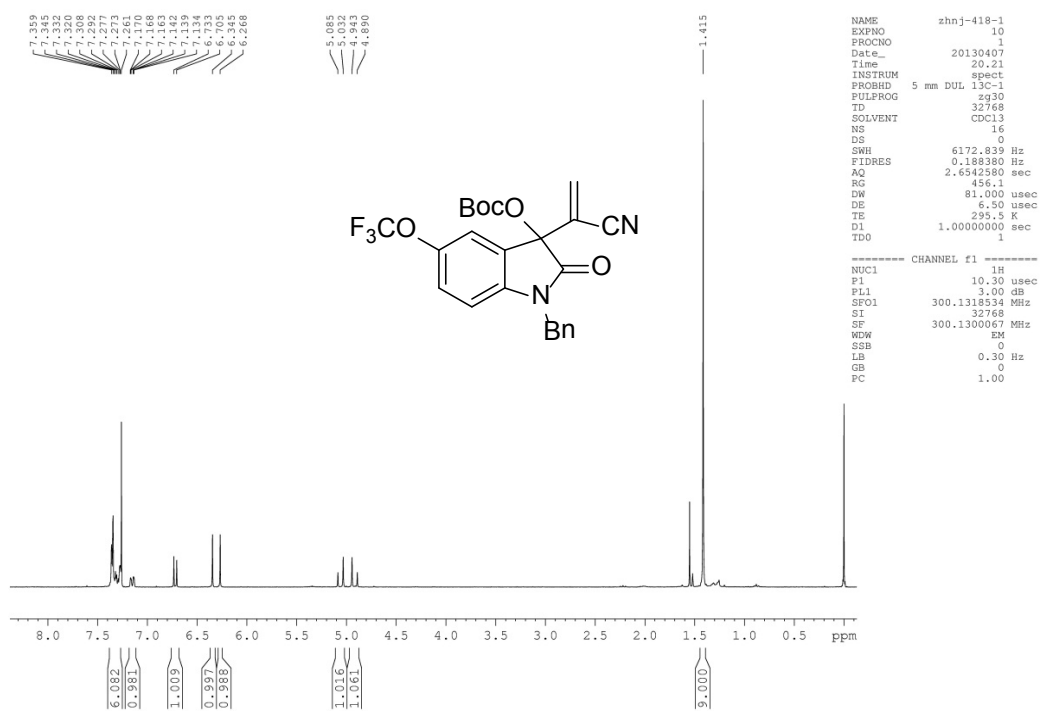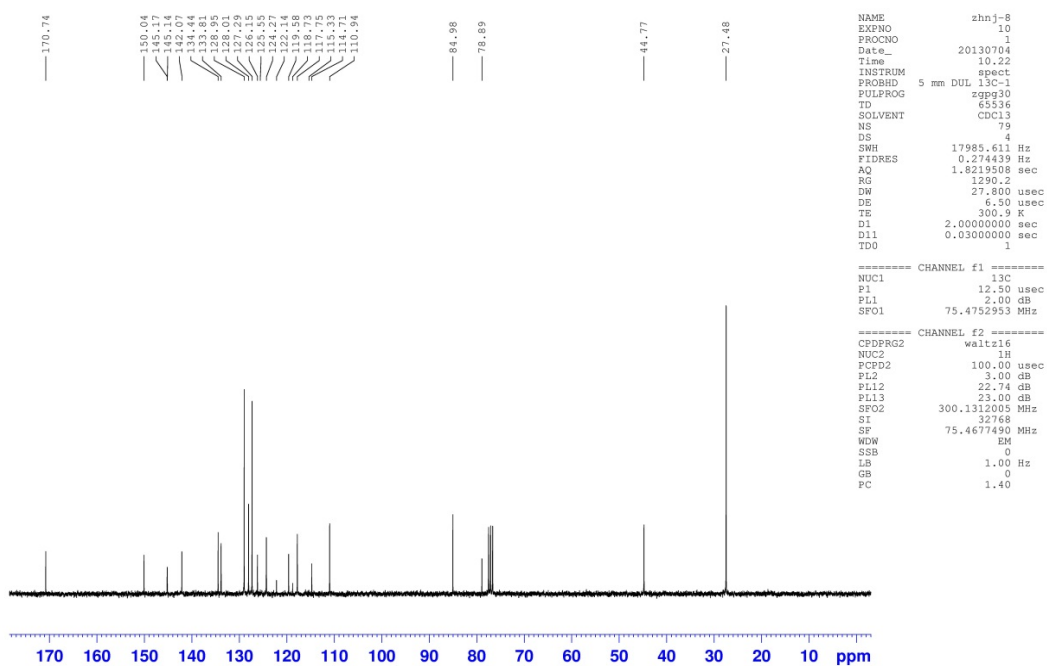

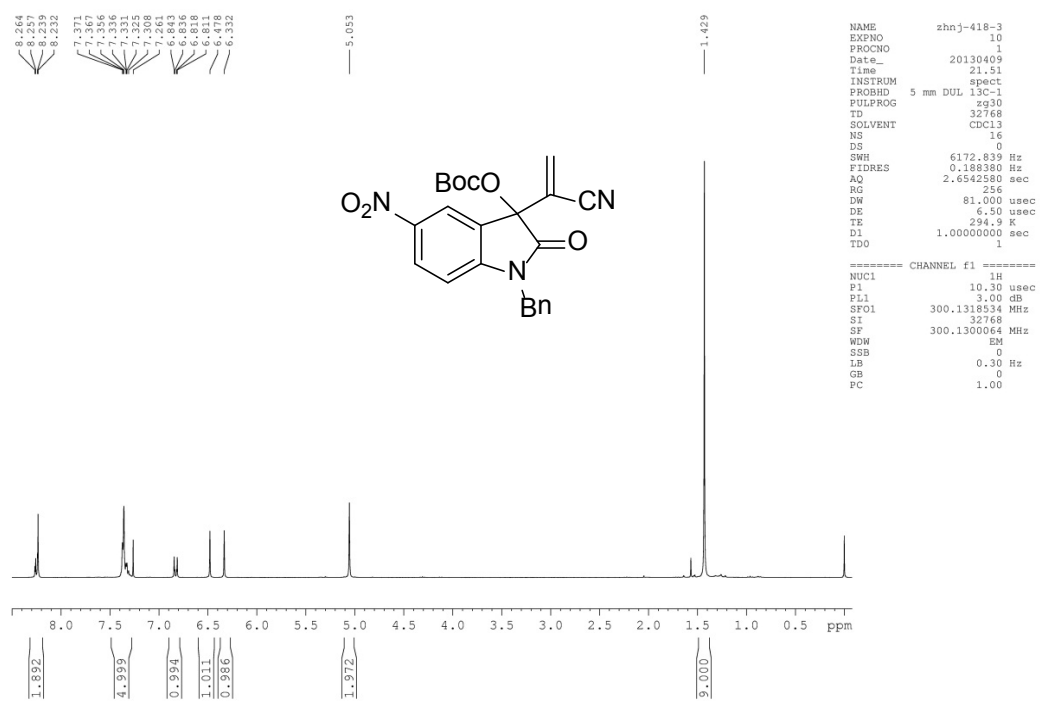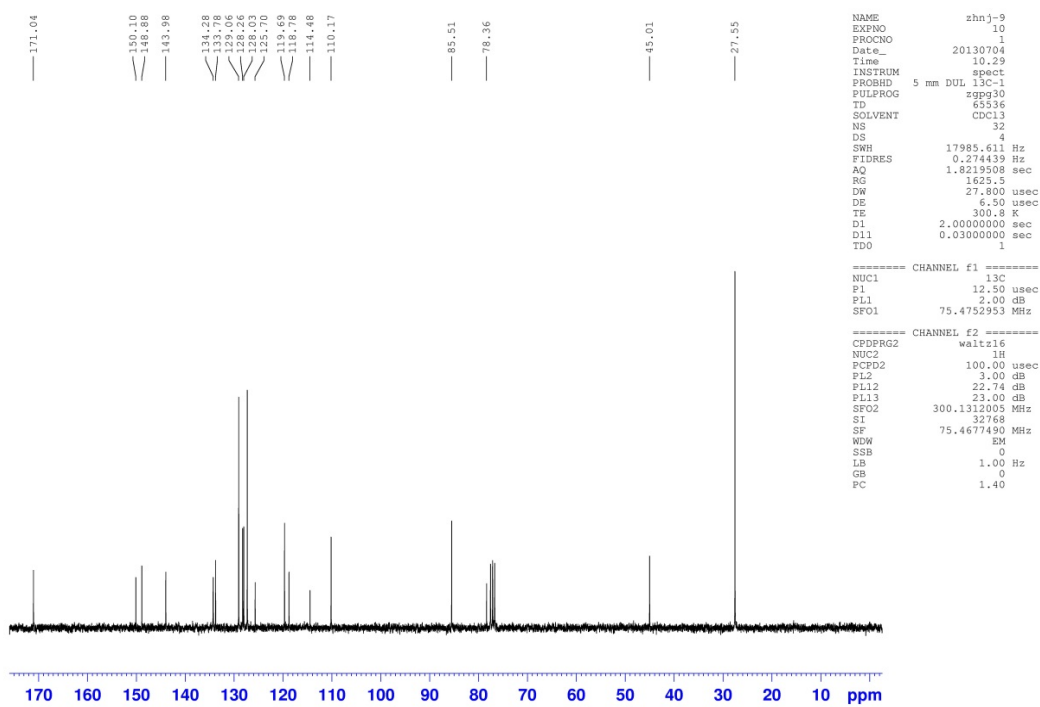

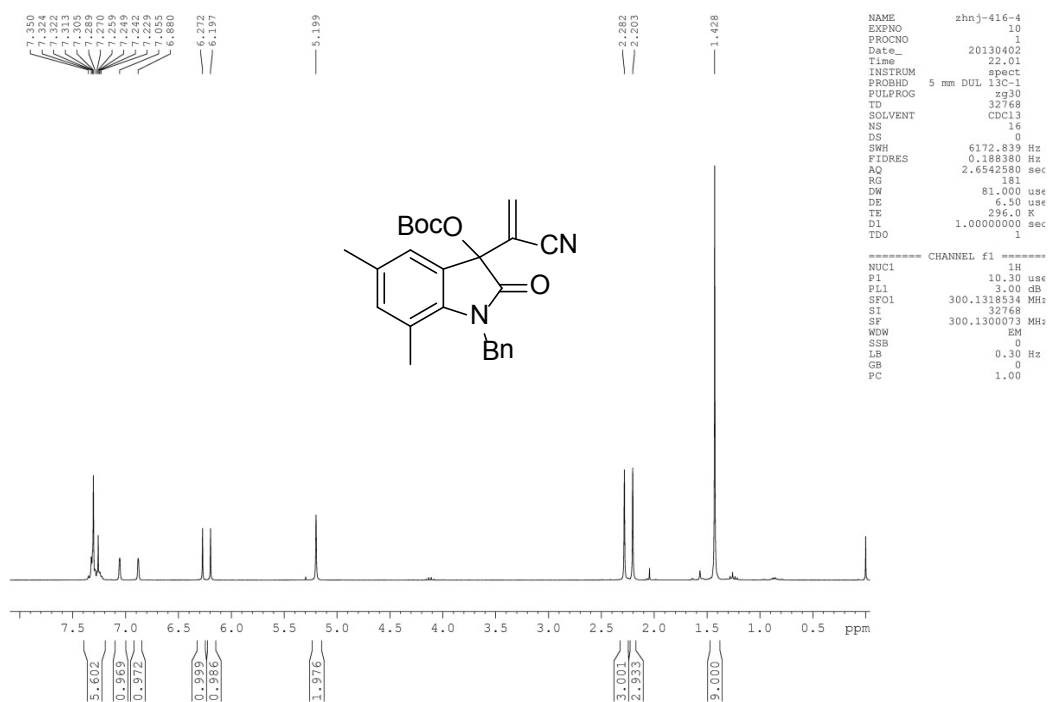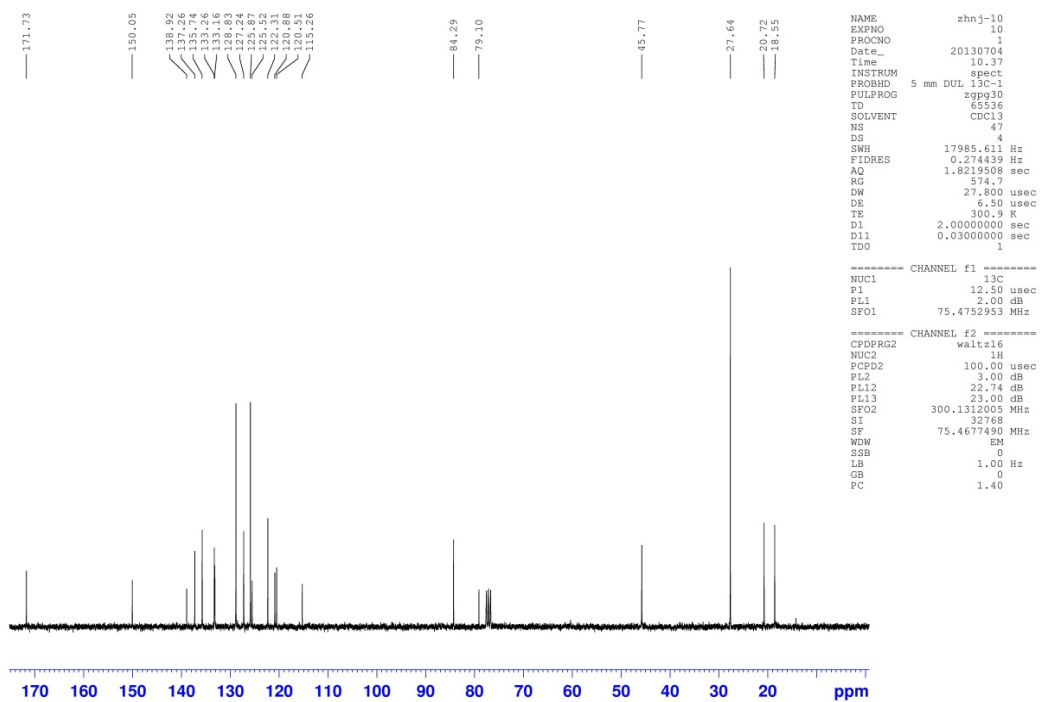

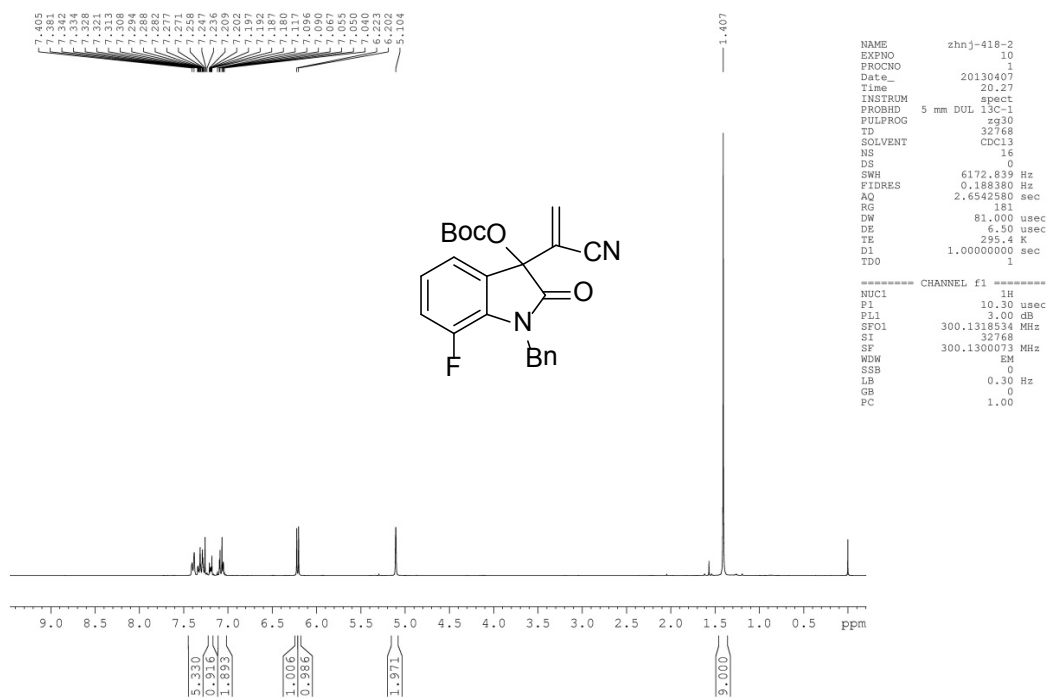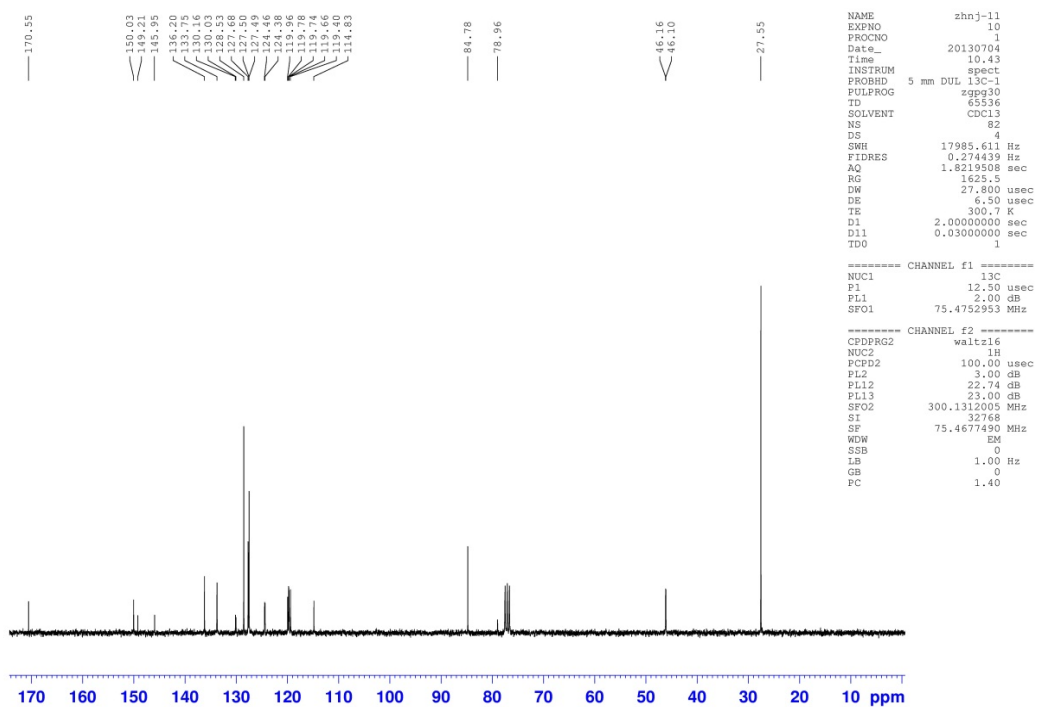



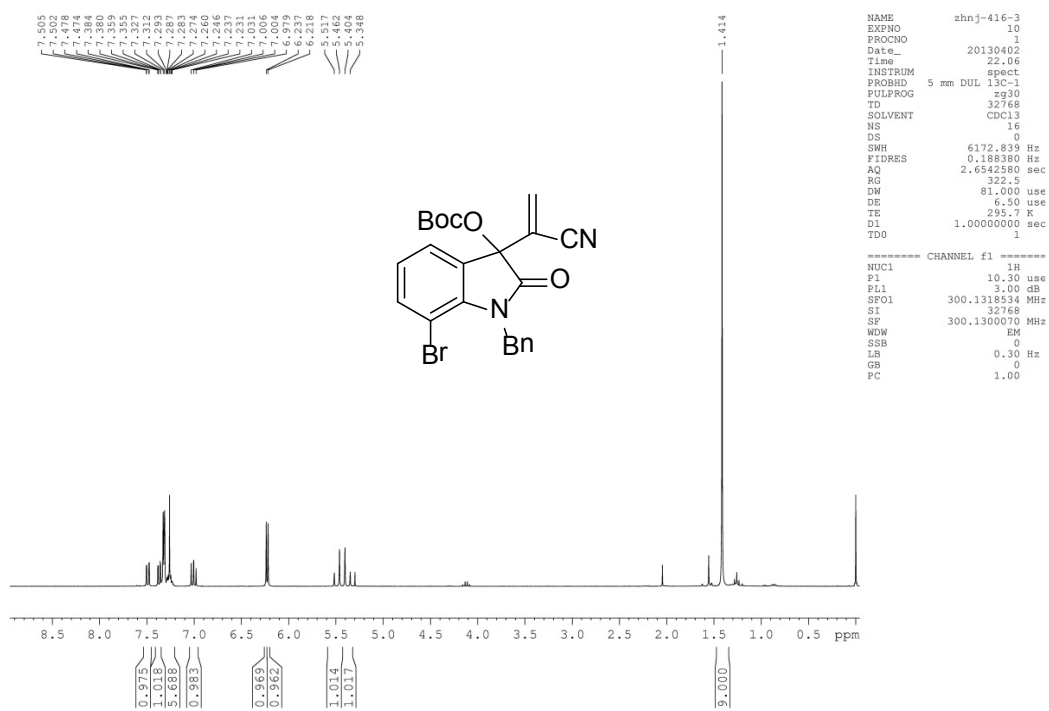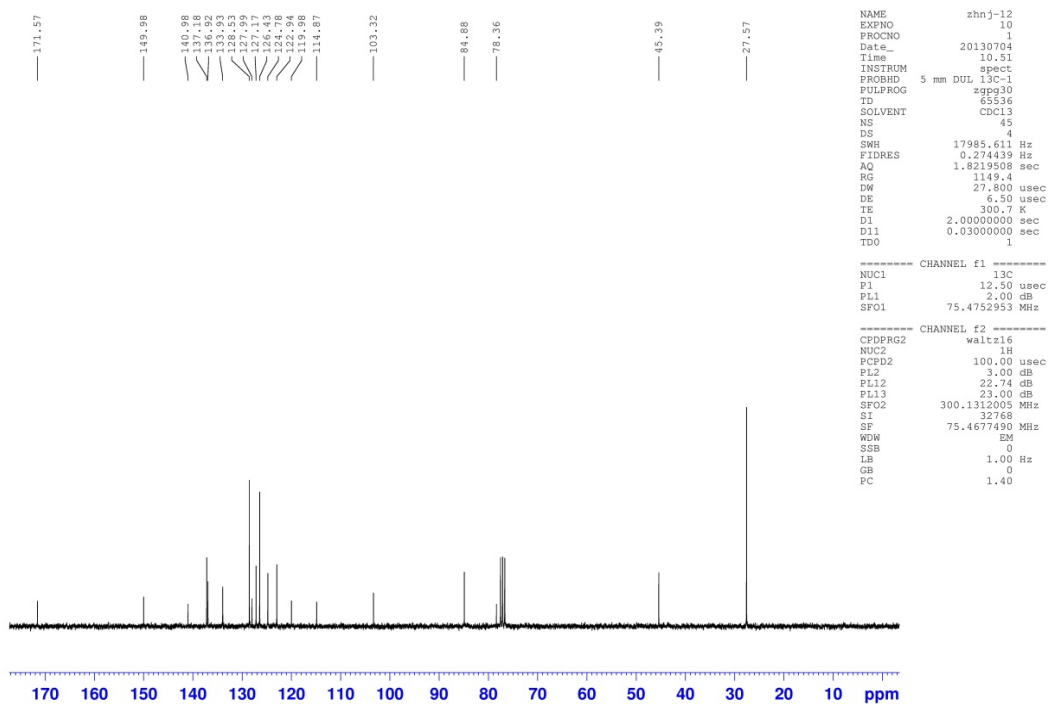

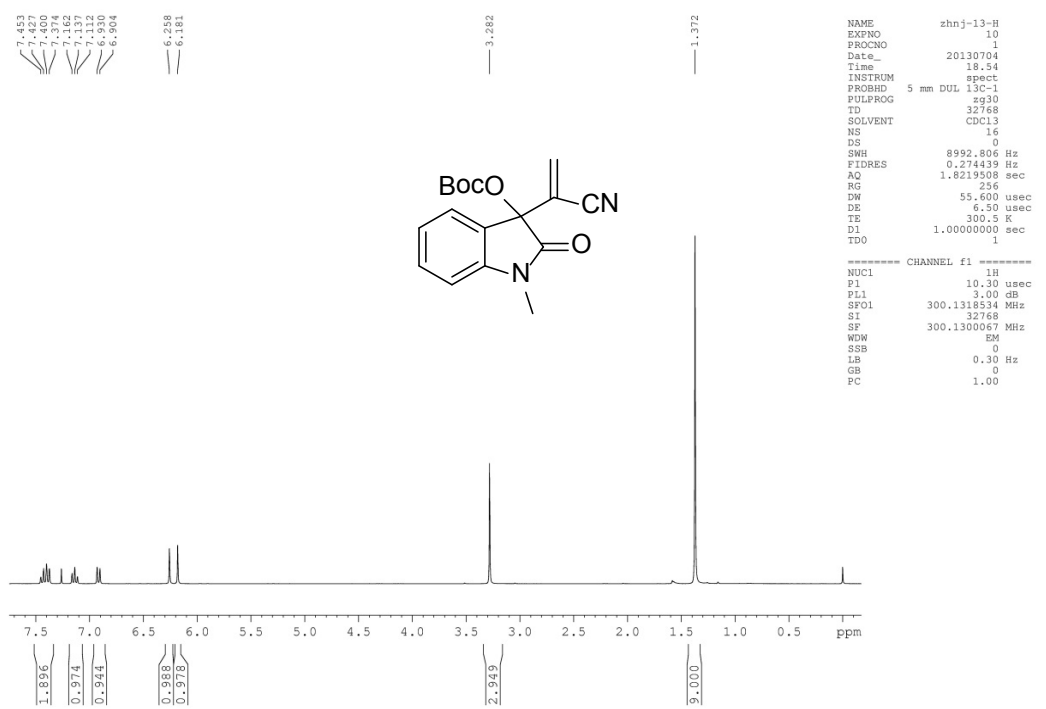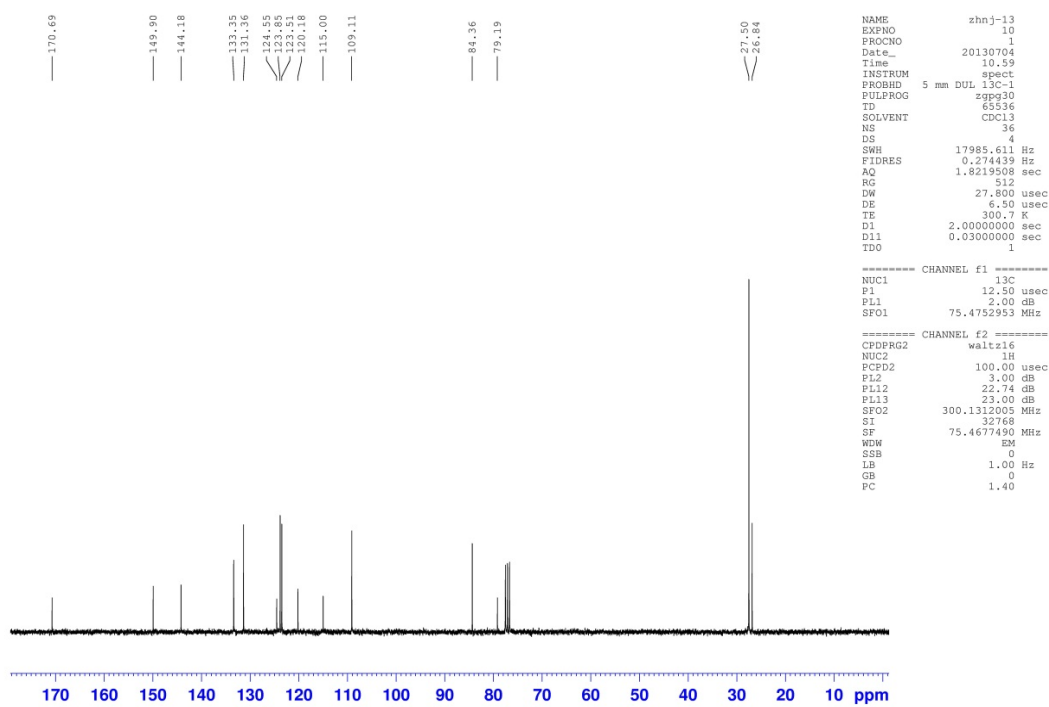

## 9.2 NMR Spectra of Products

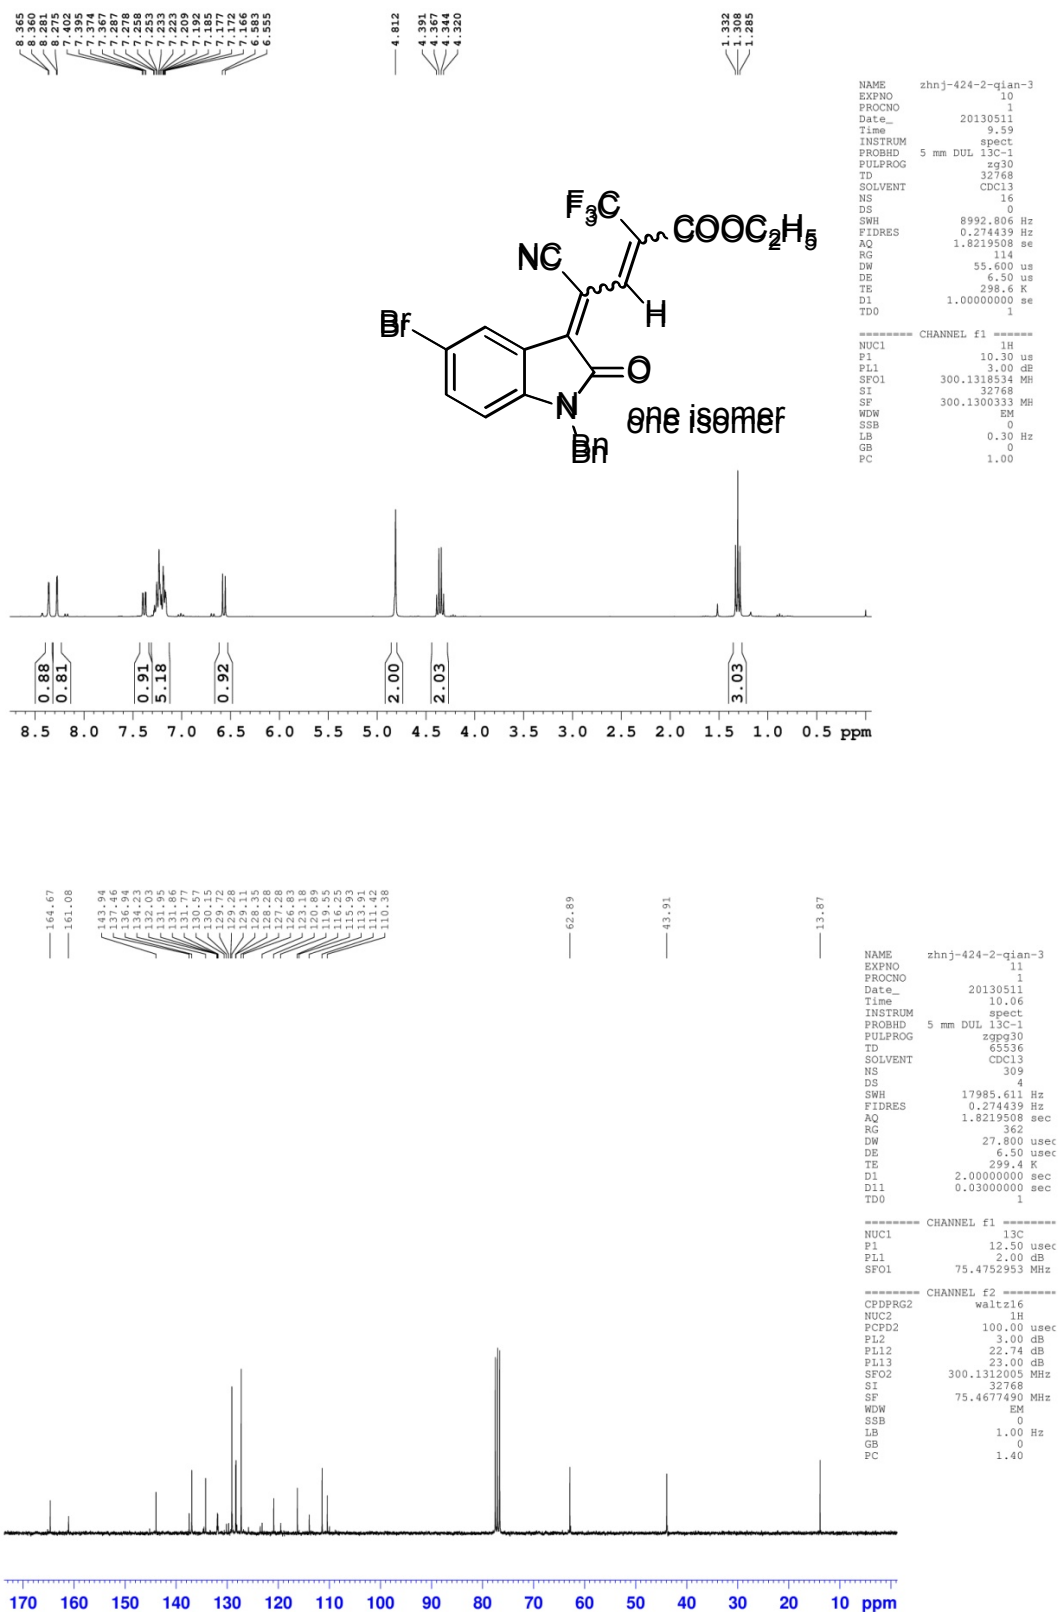

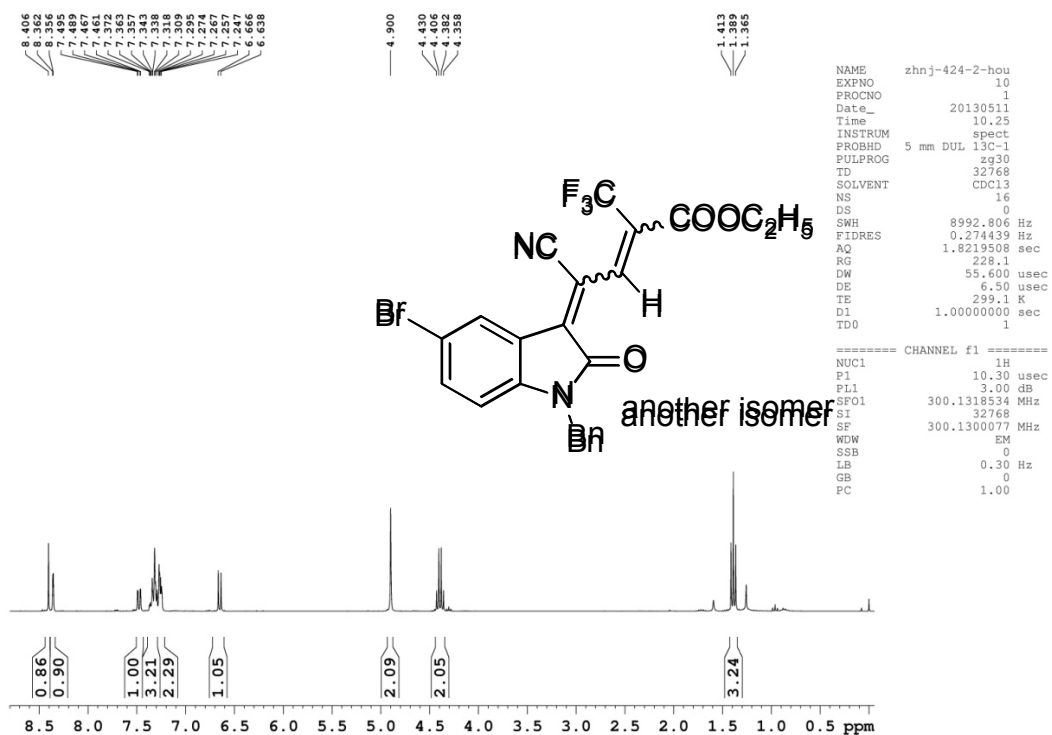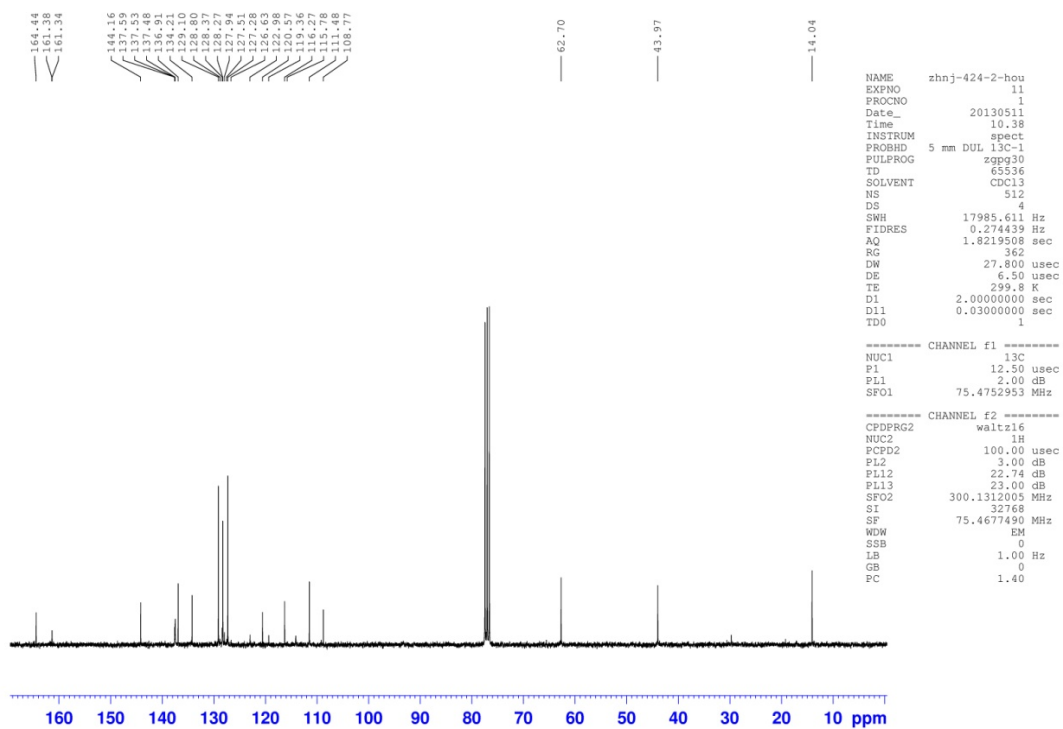

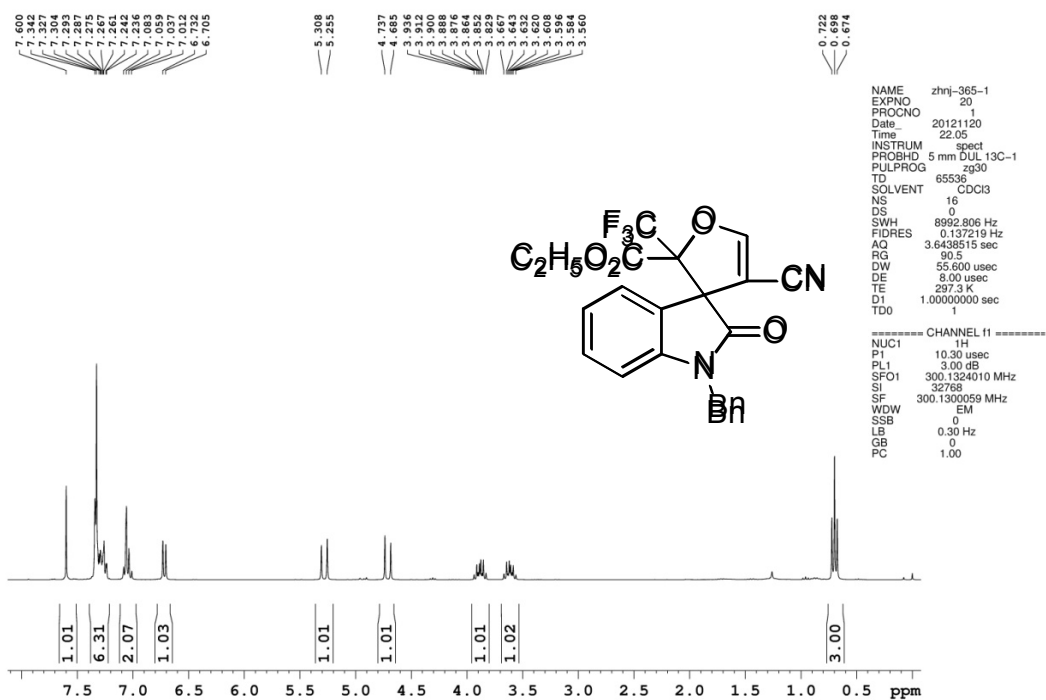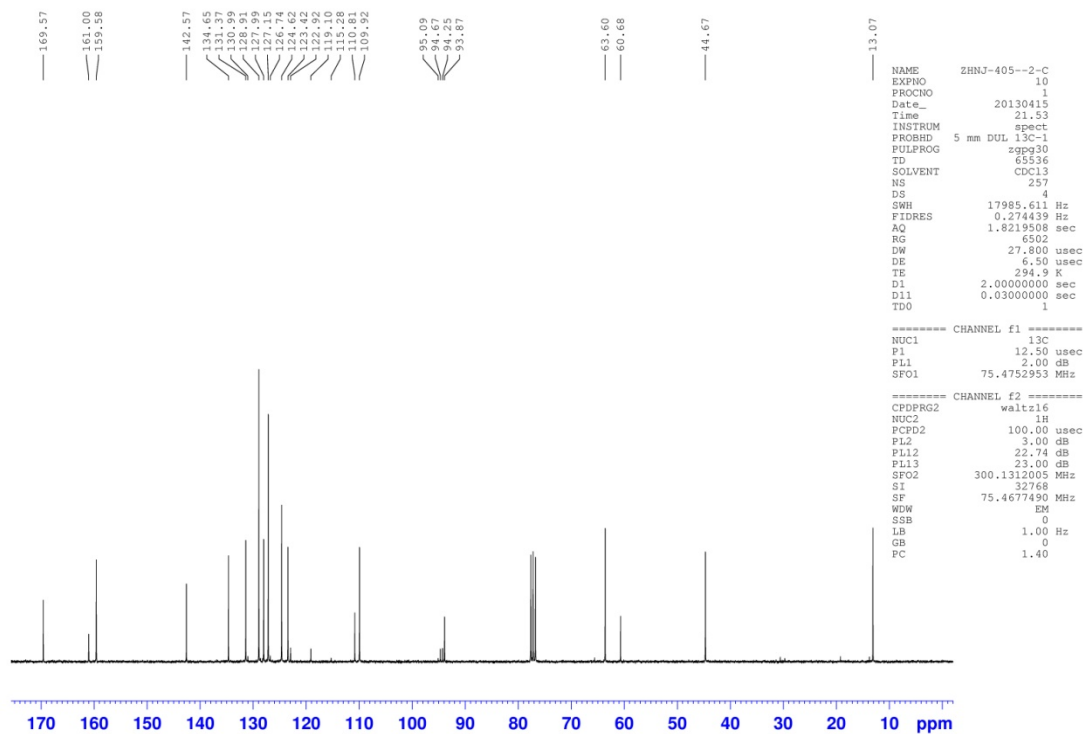

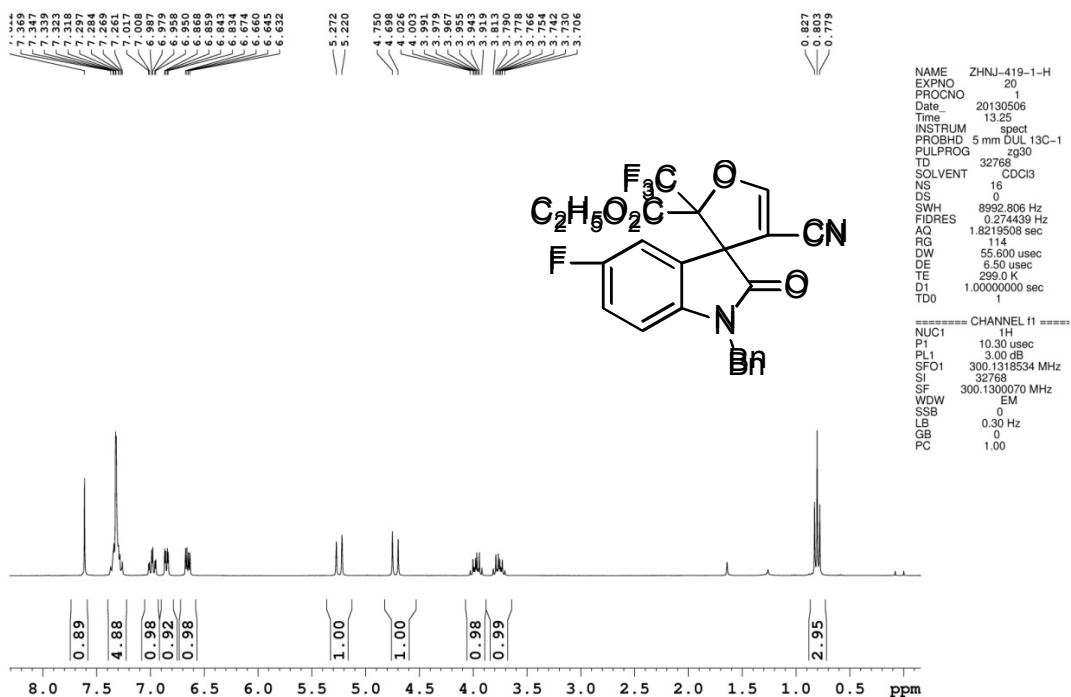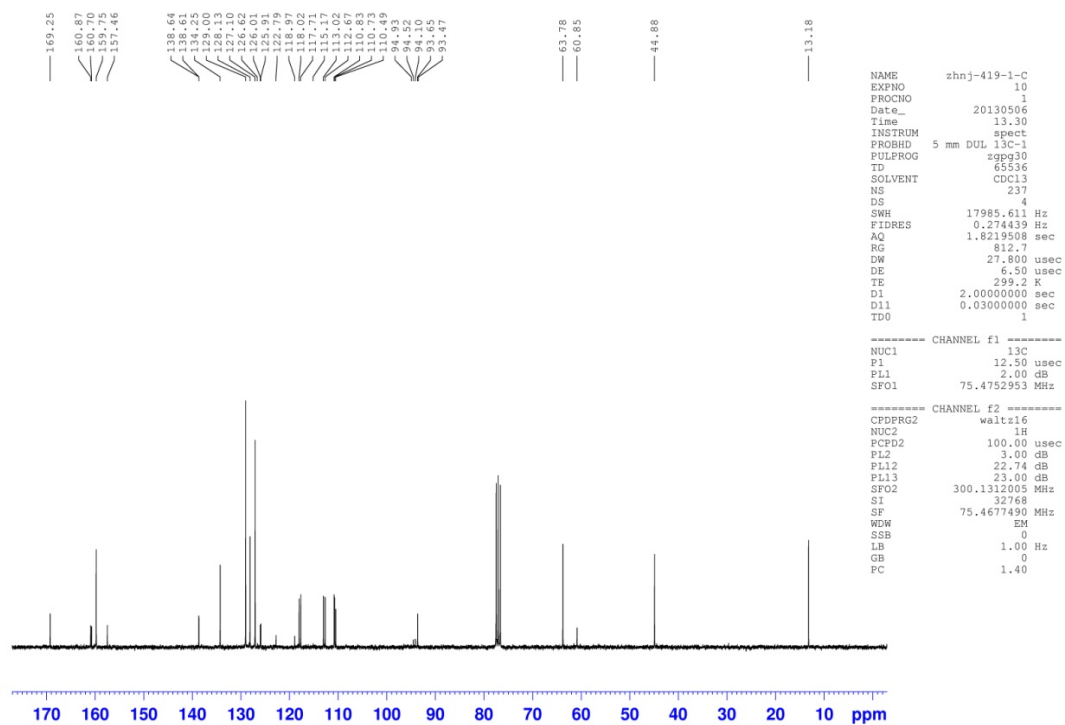

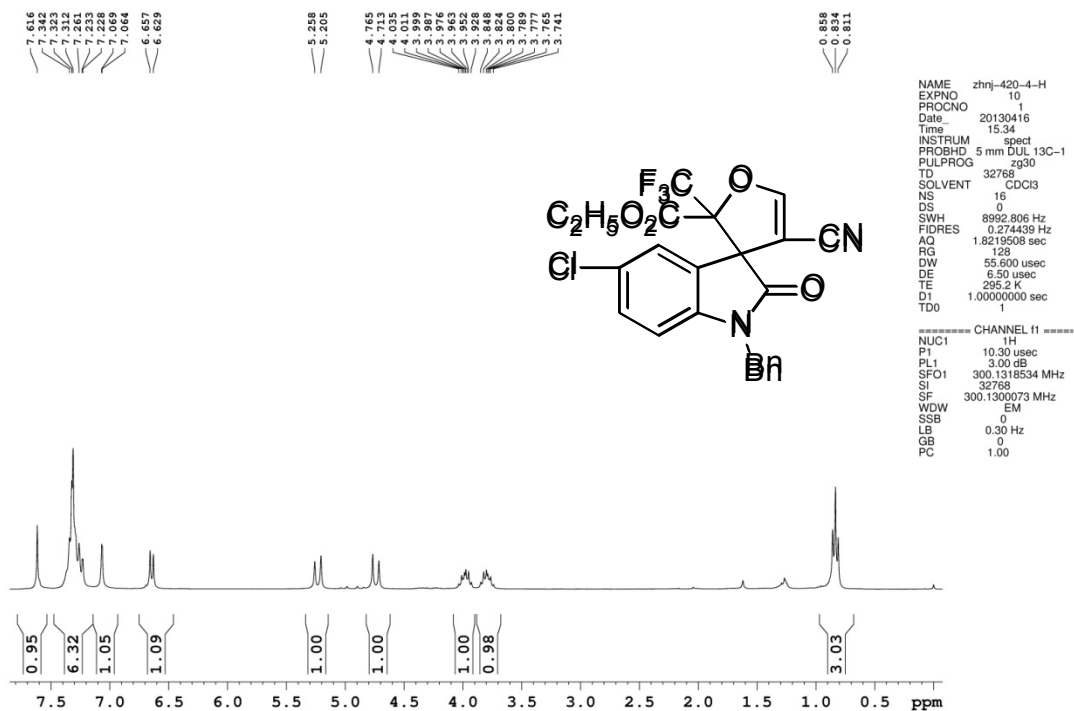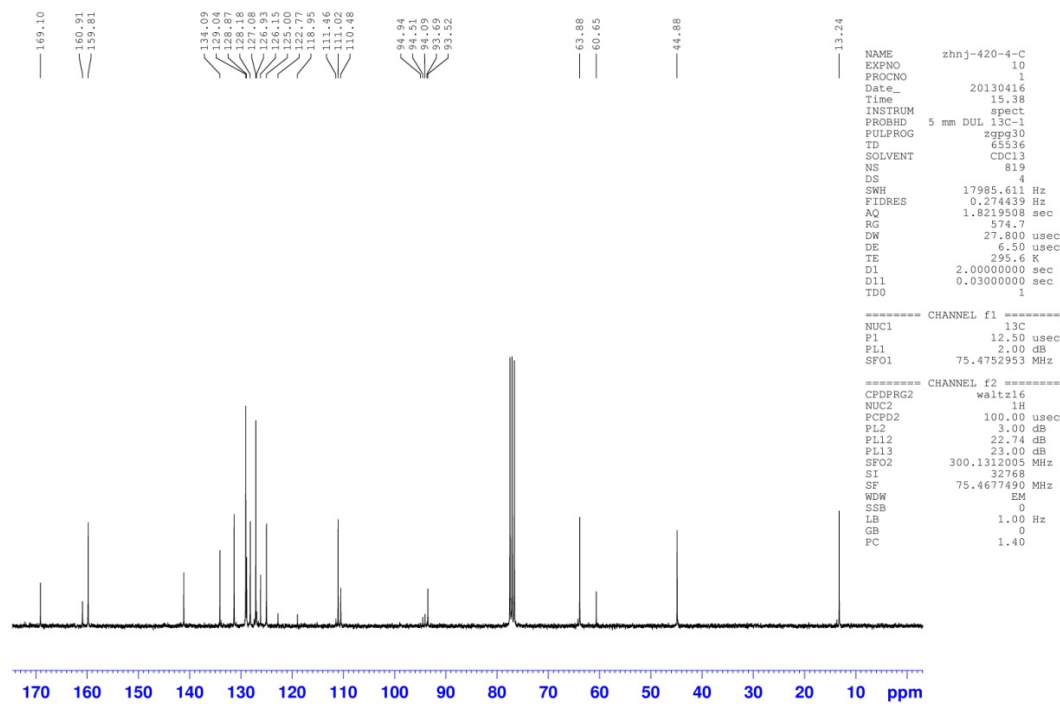

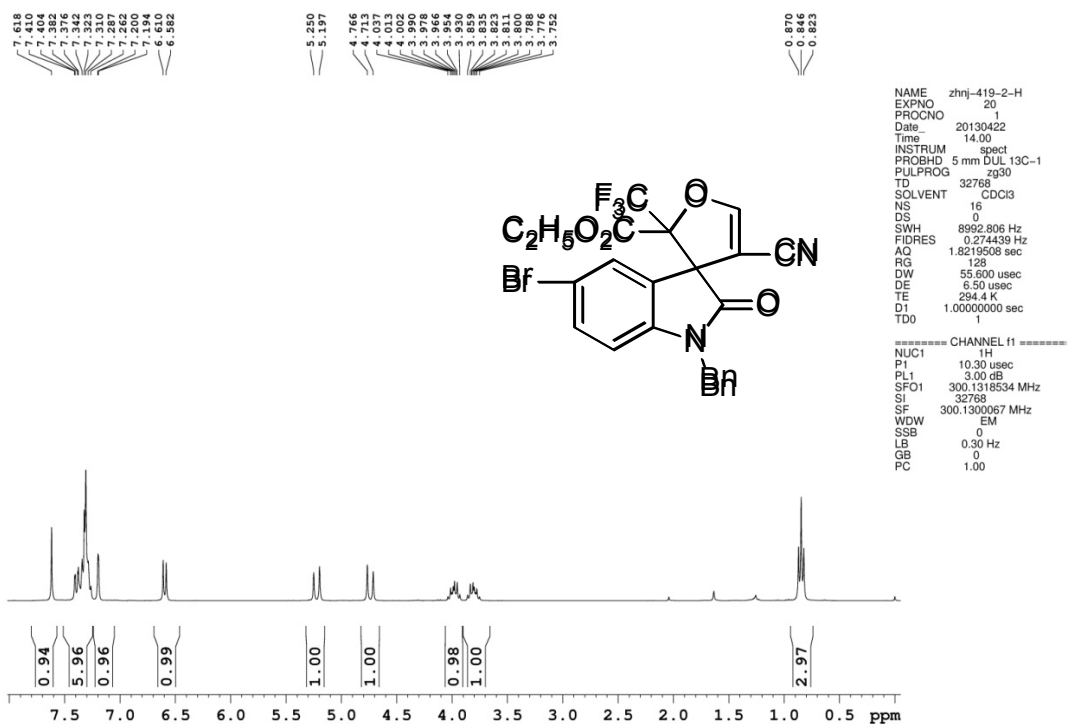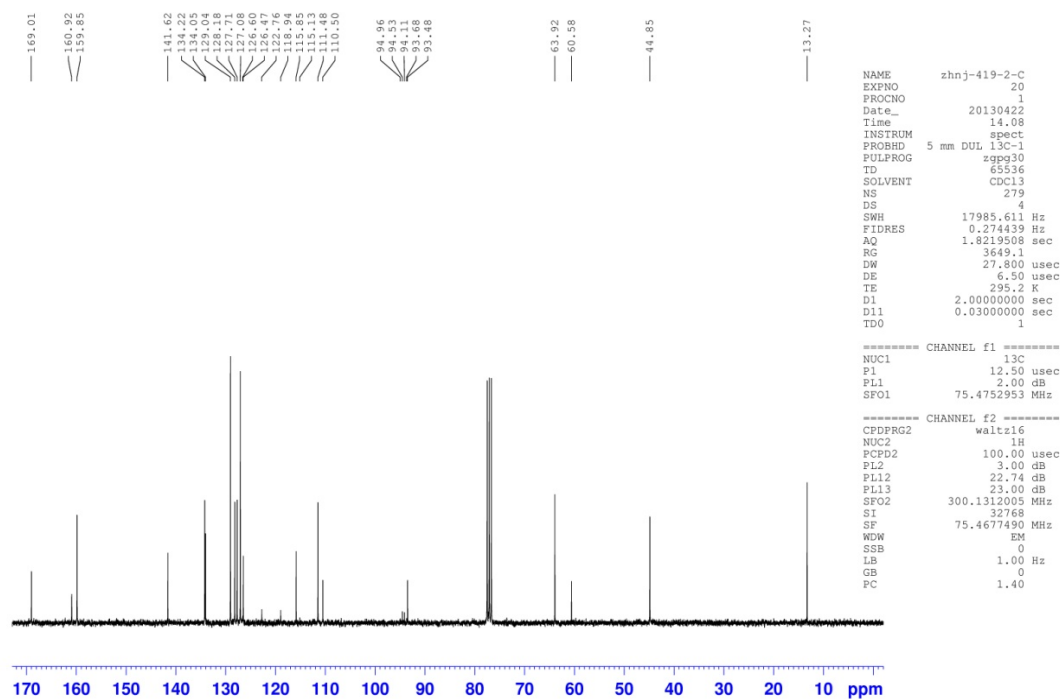



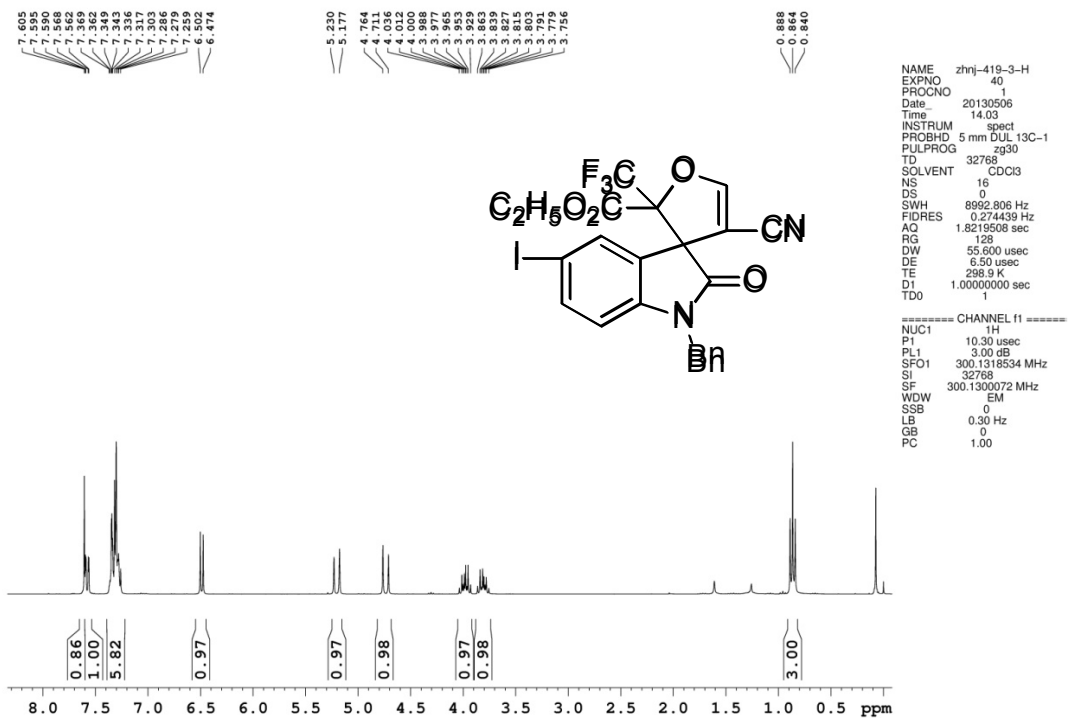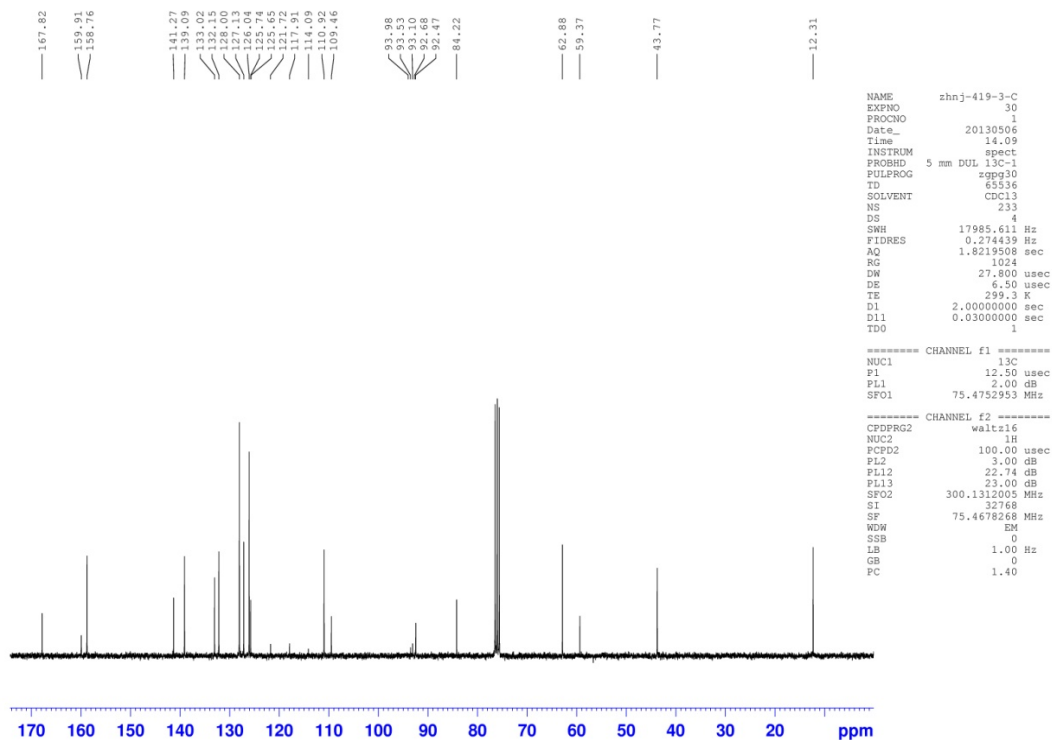

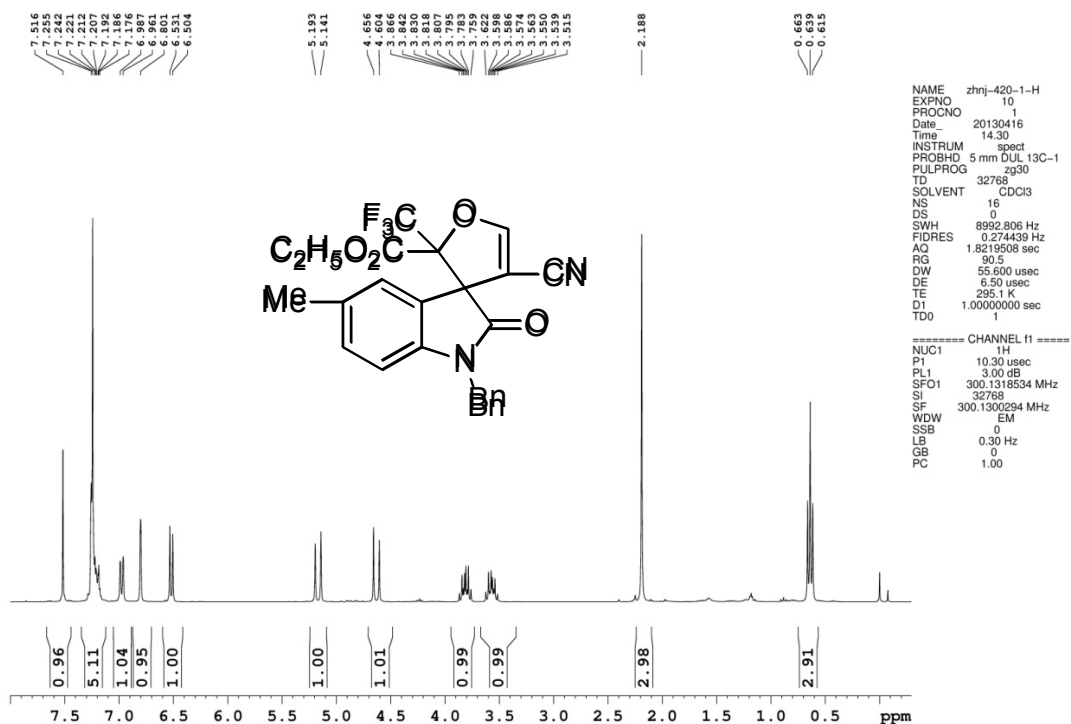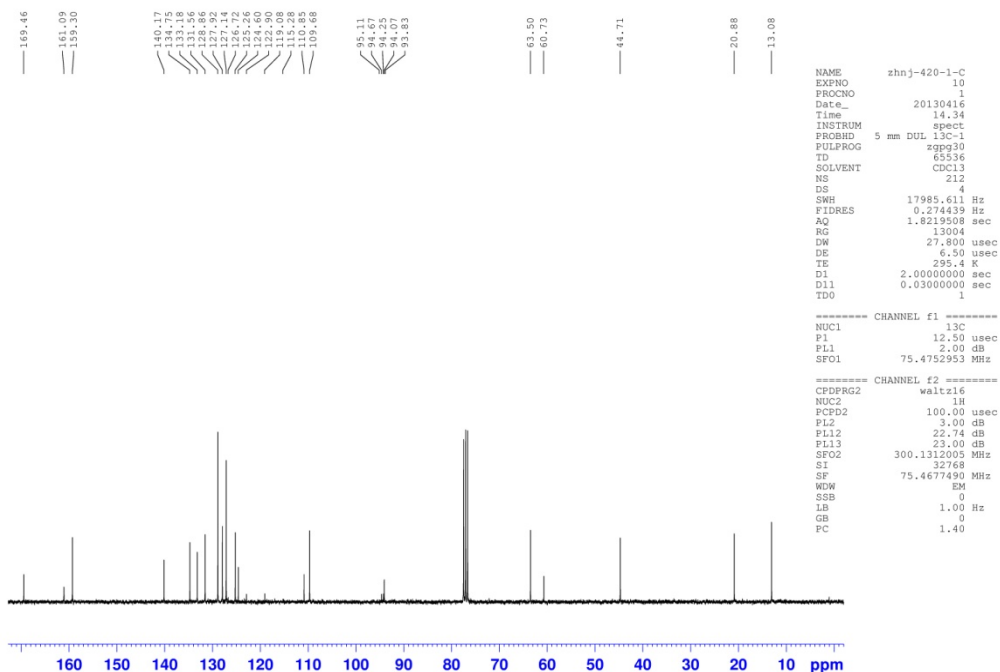

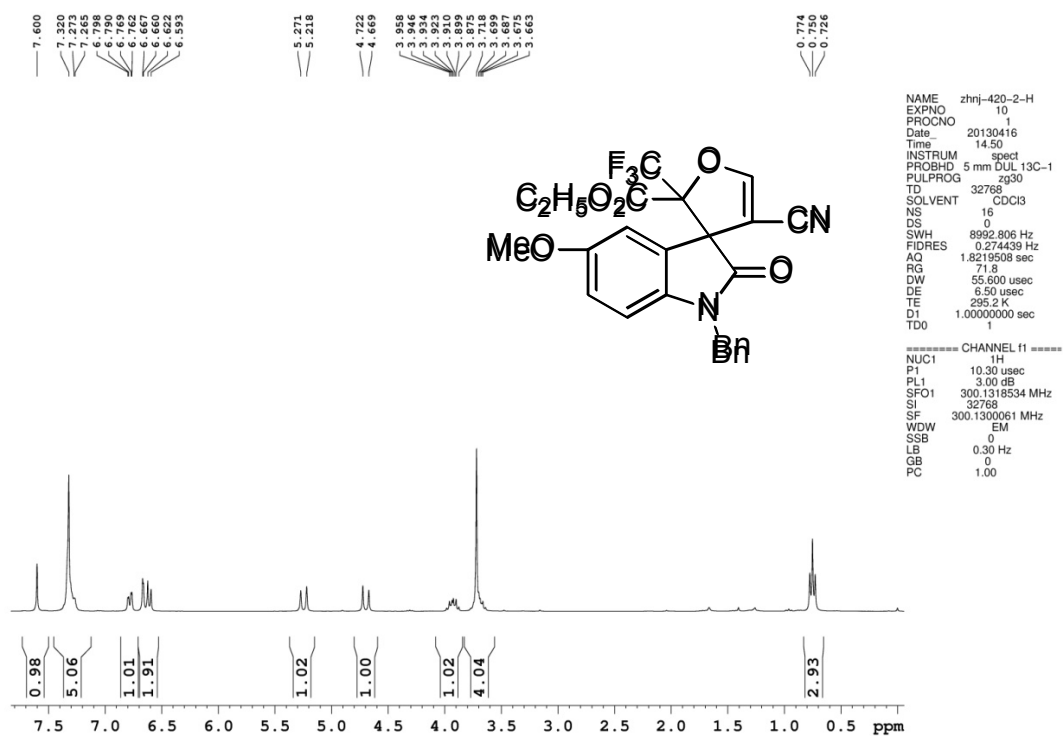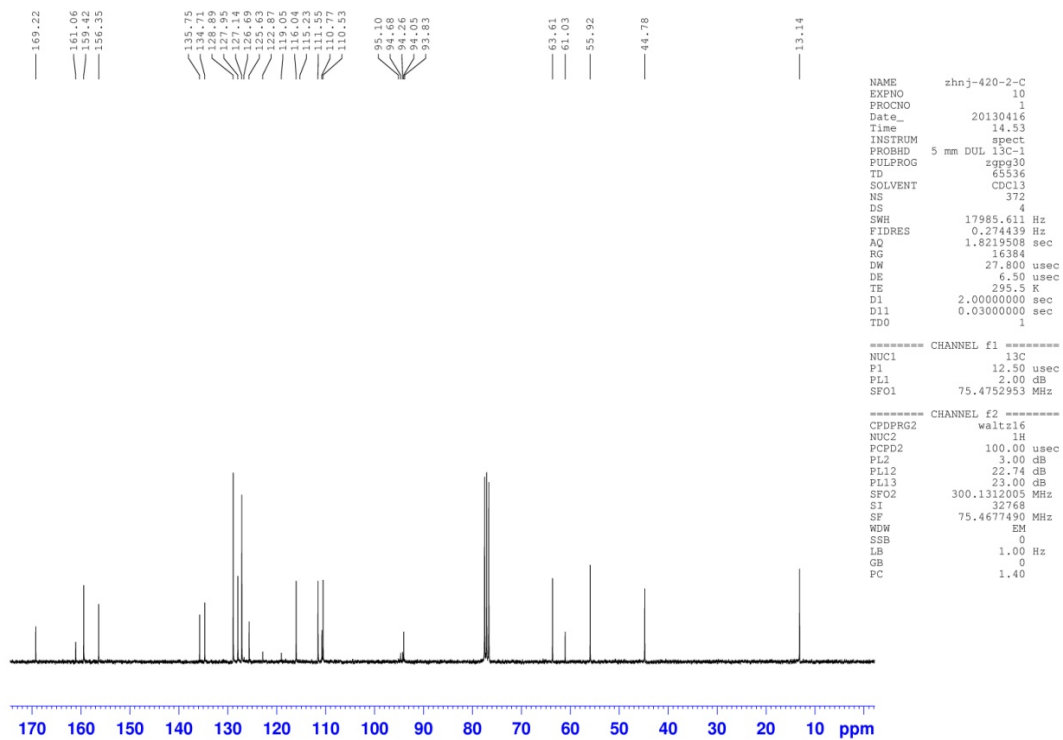

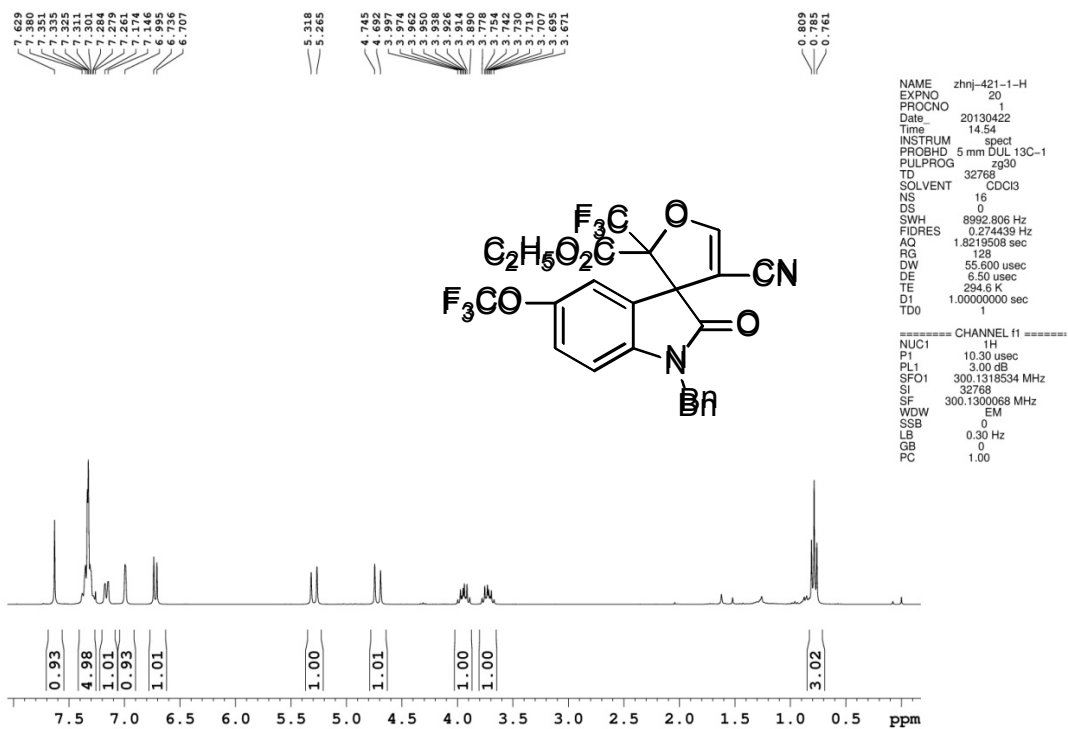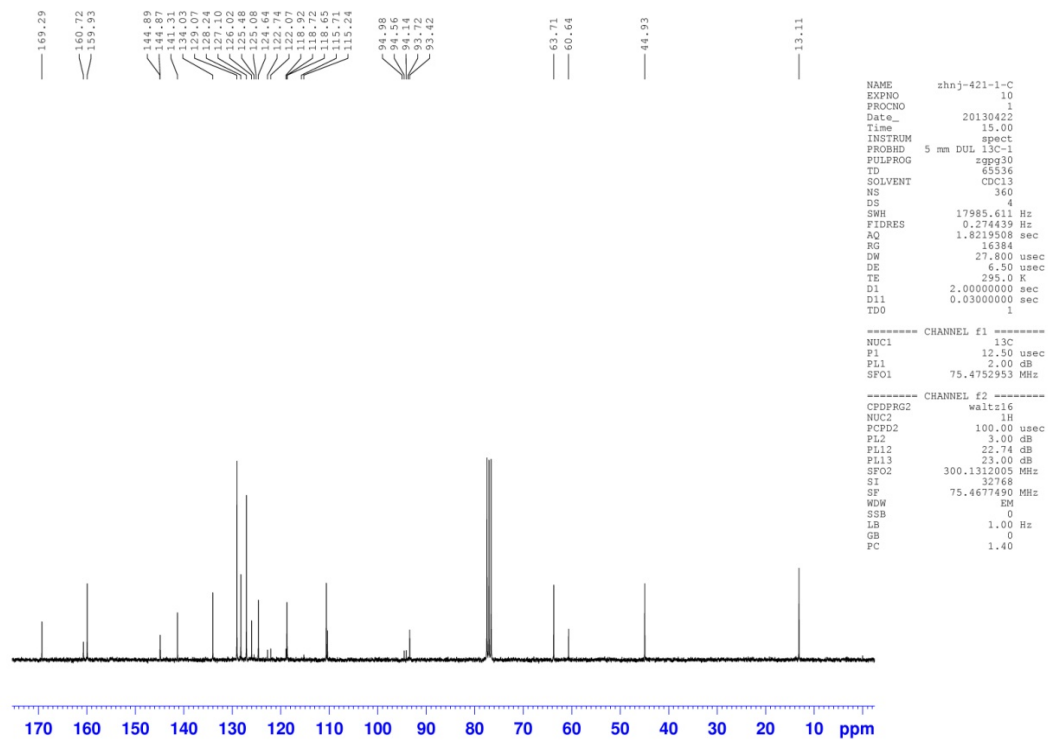

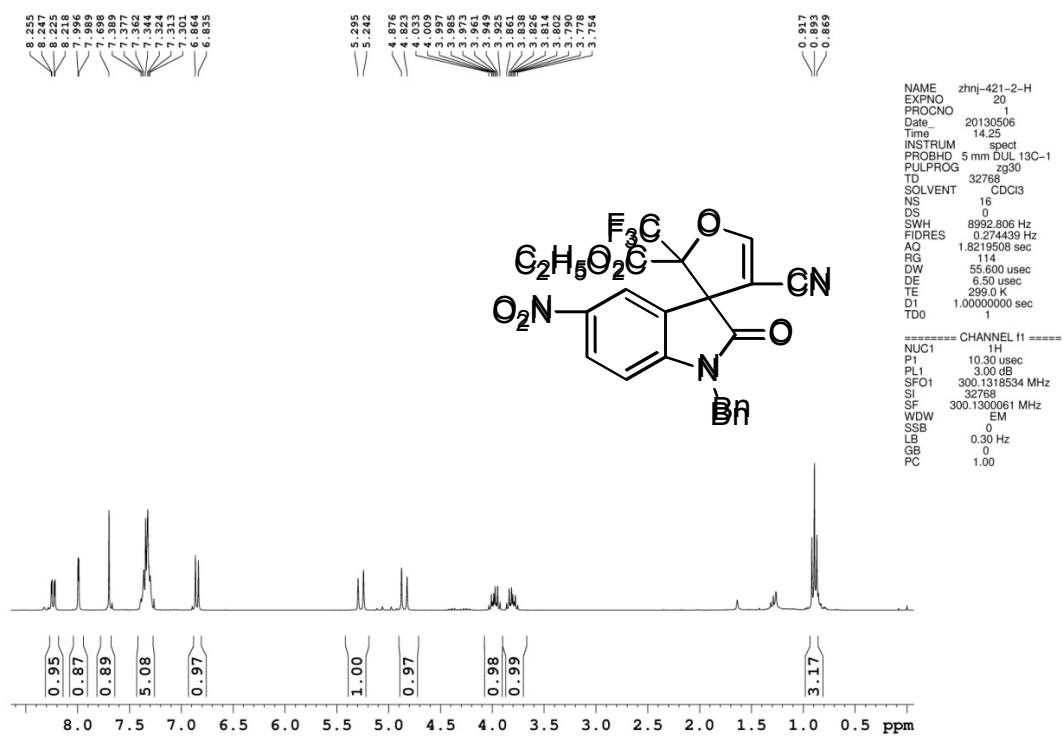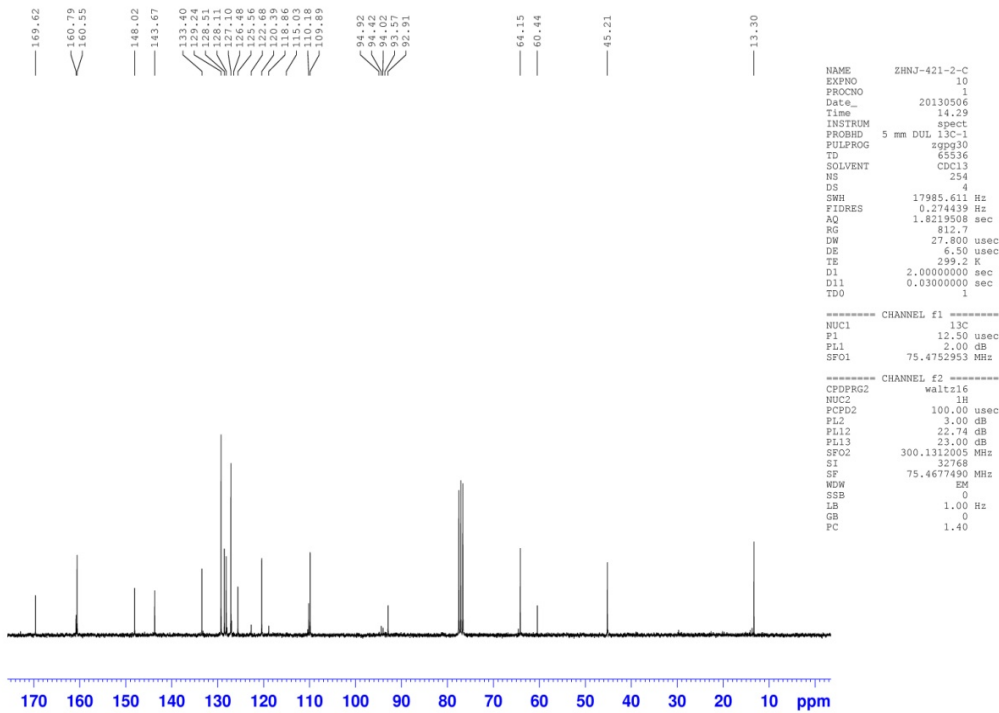

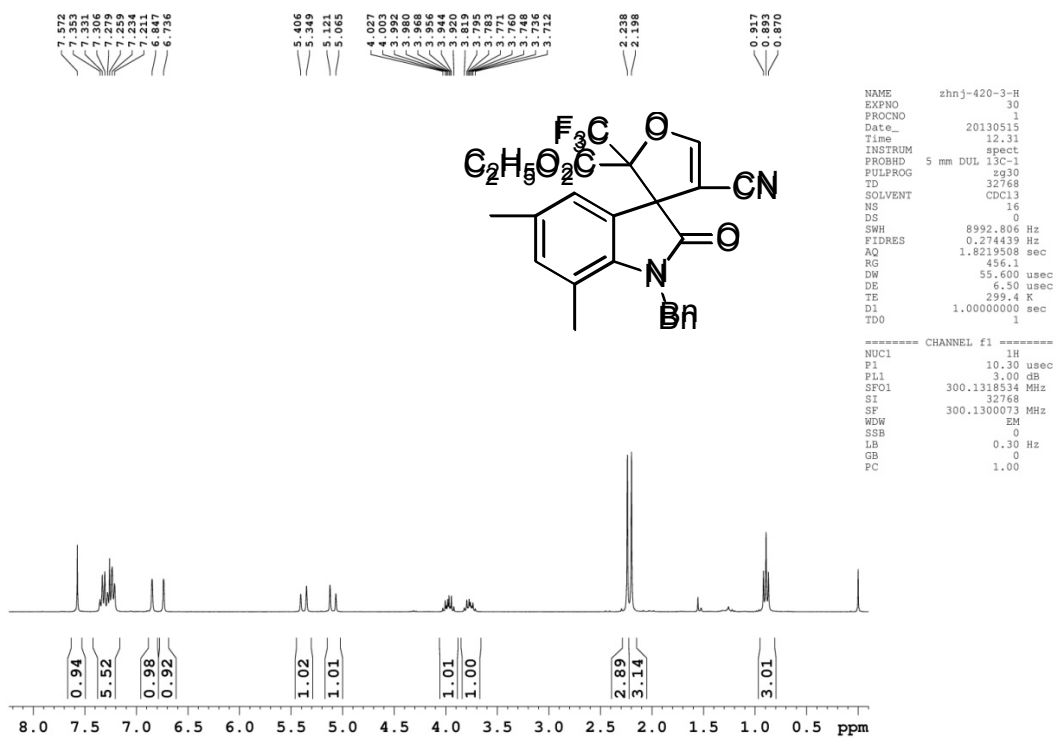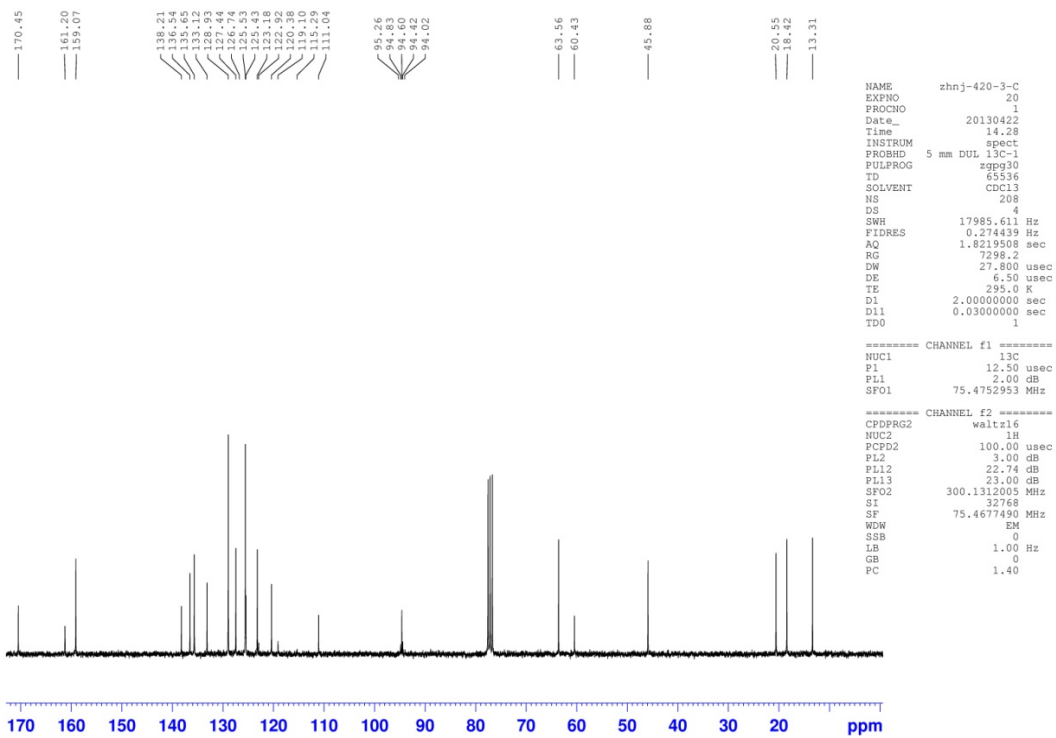

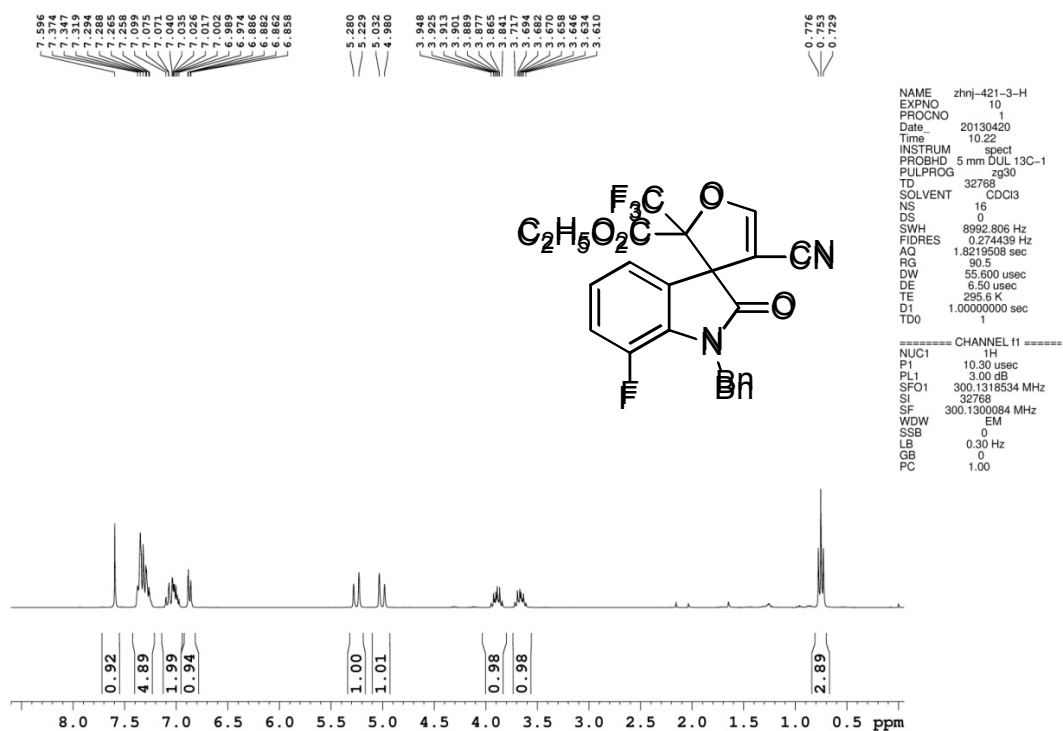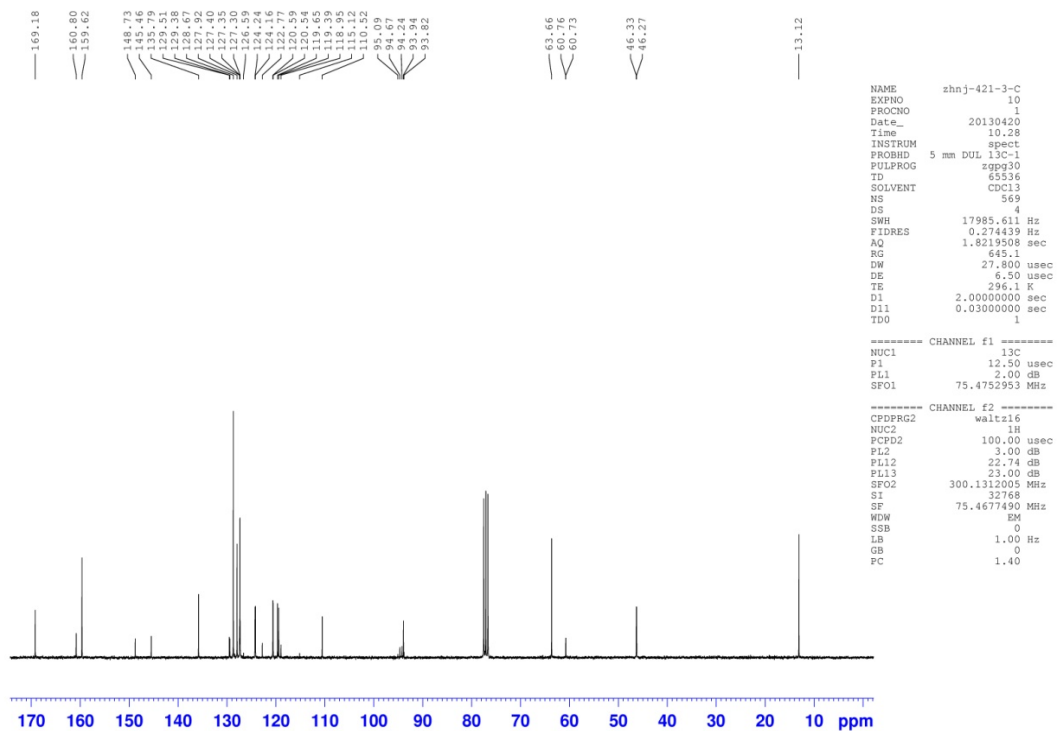

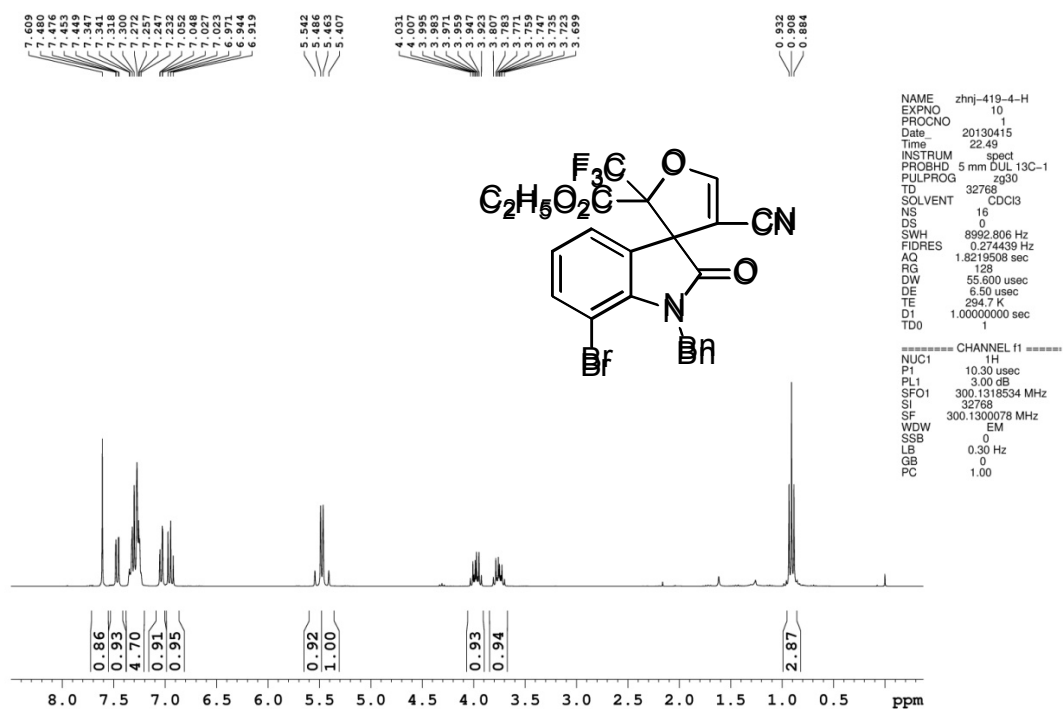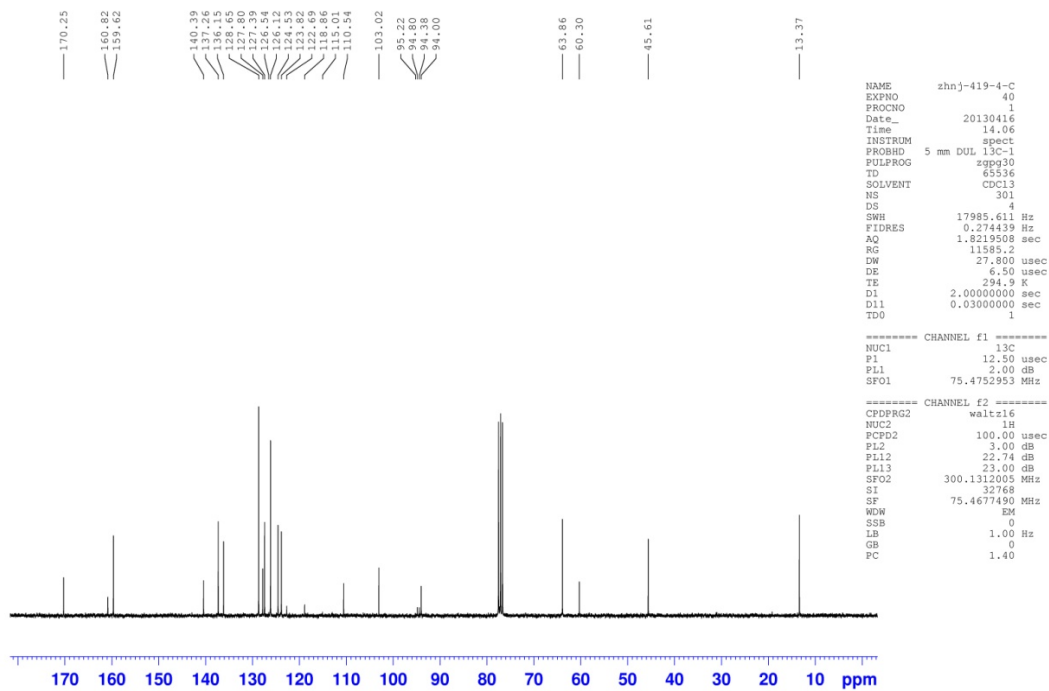



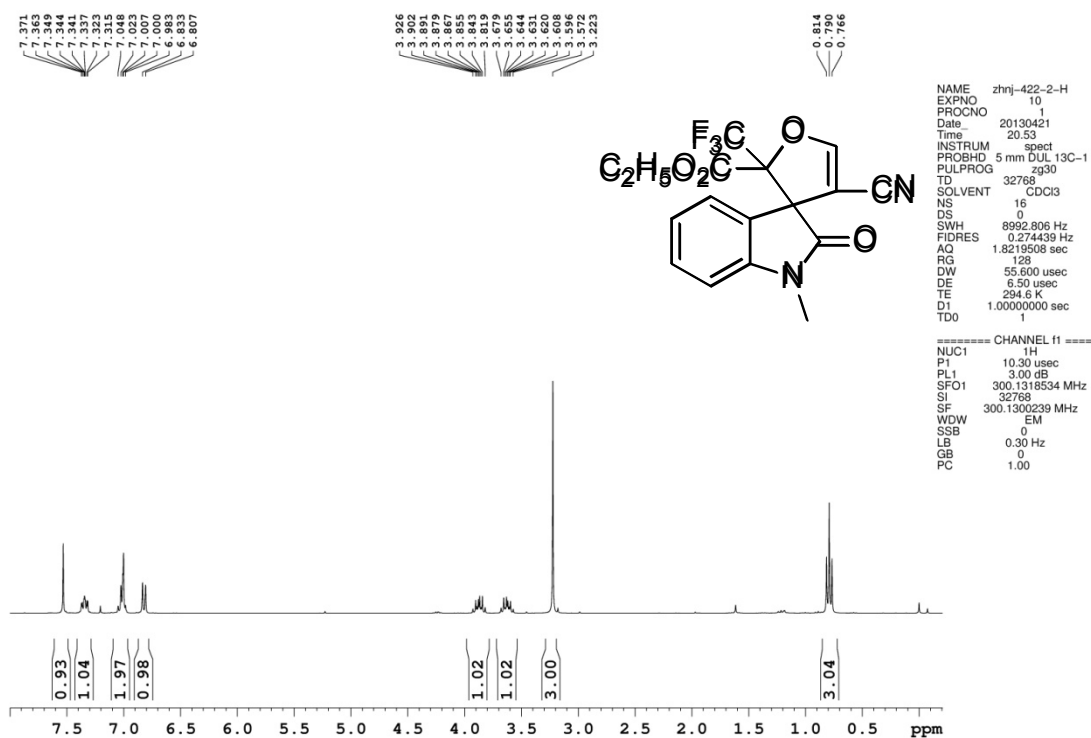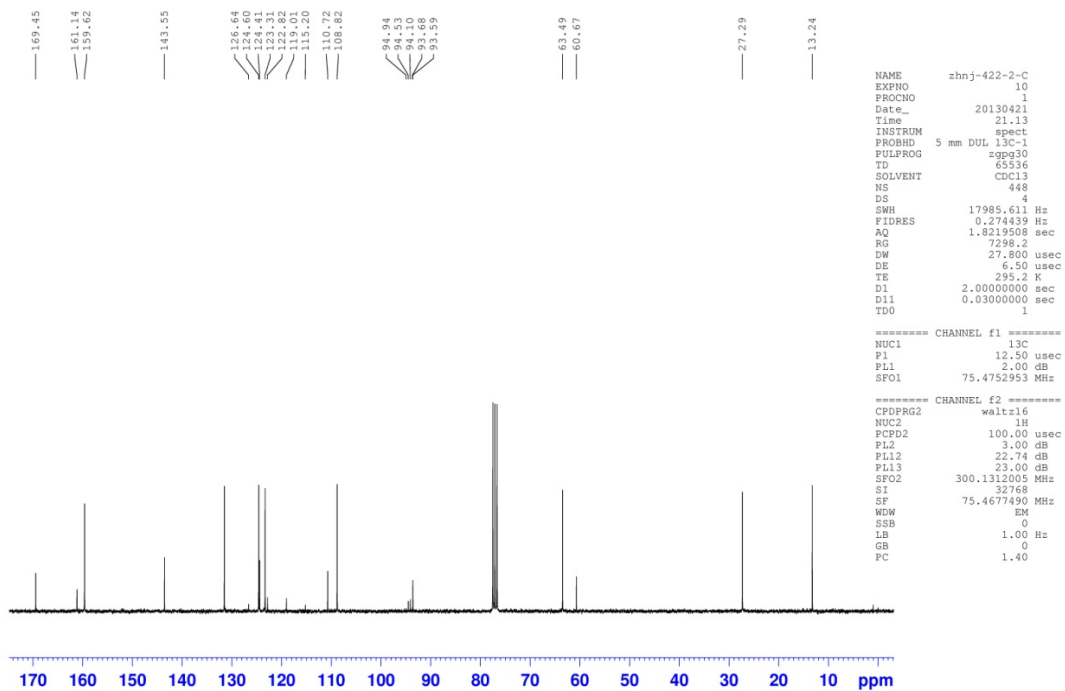

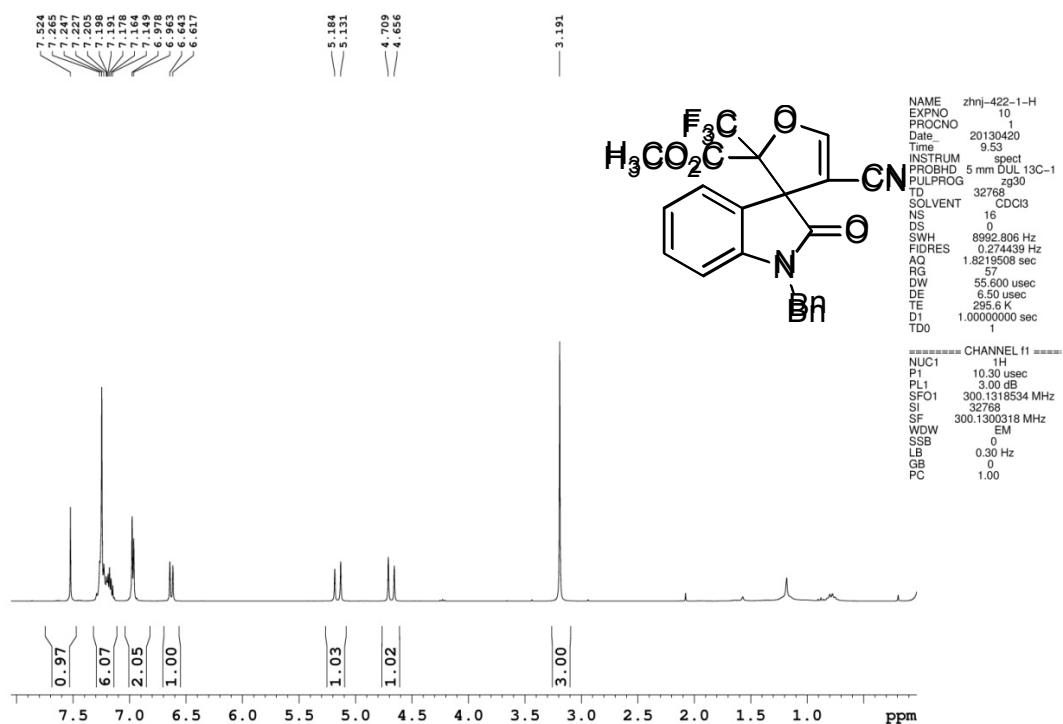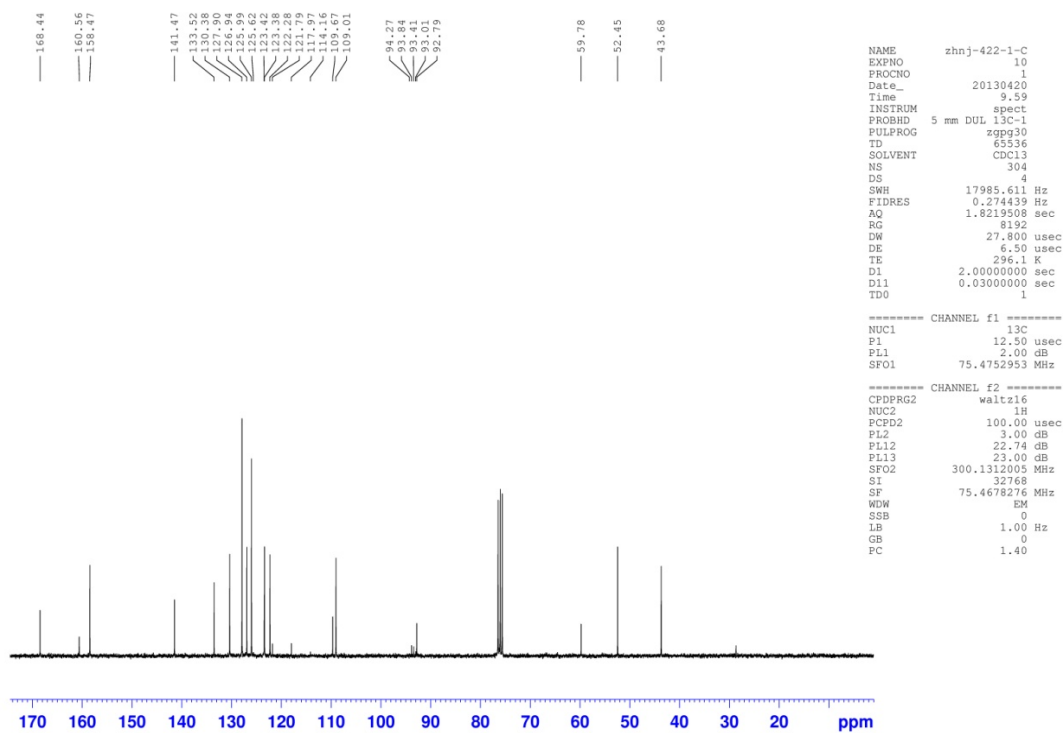

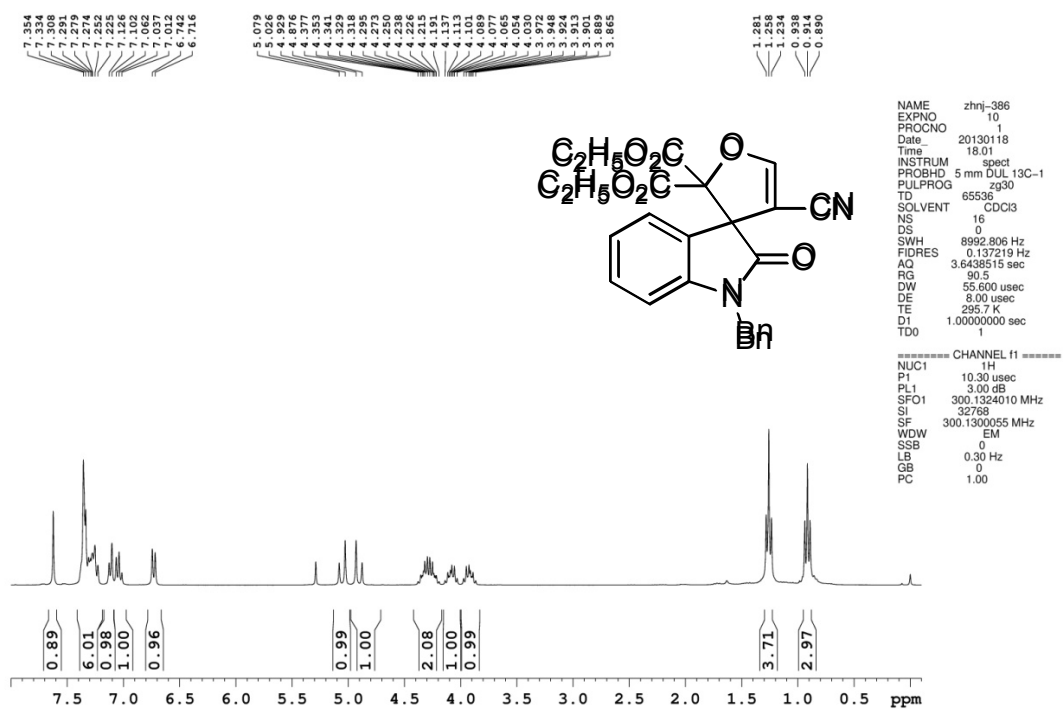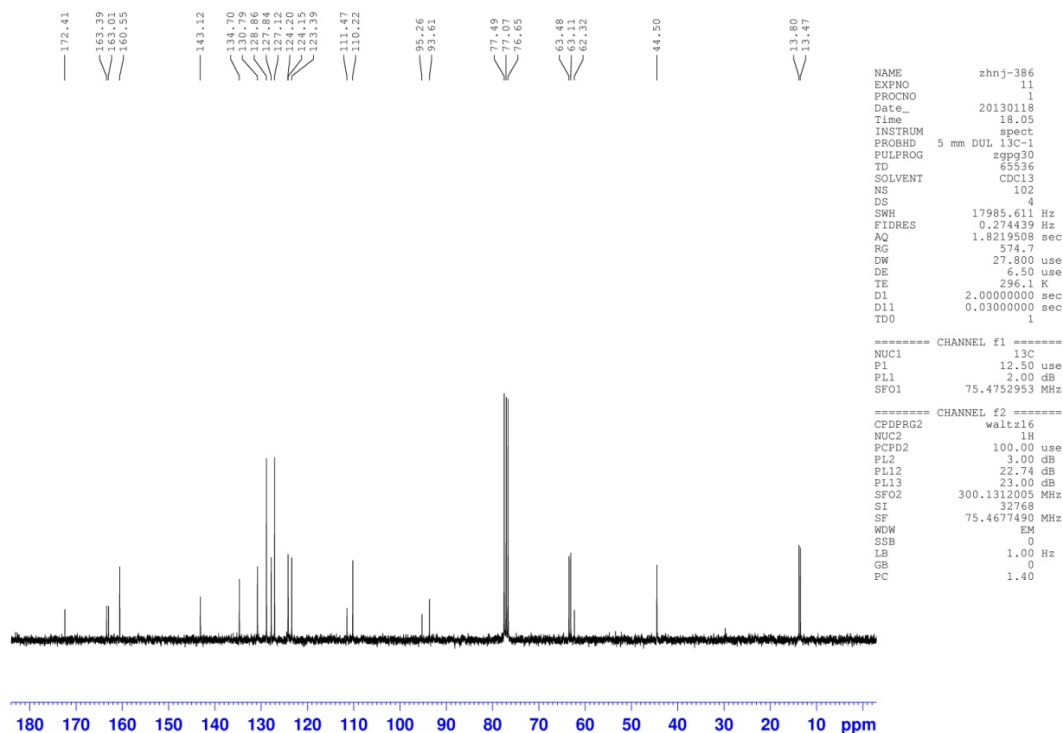

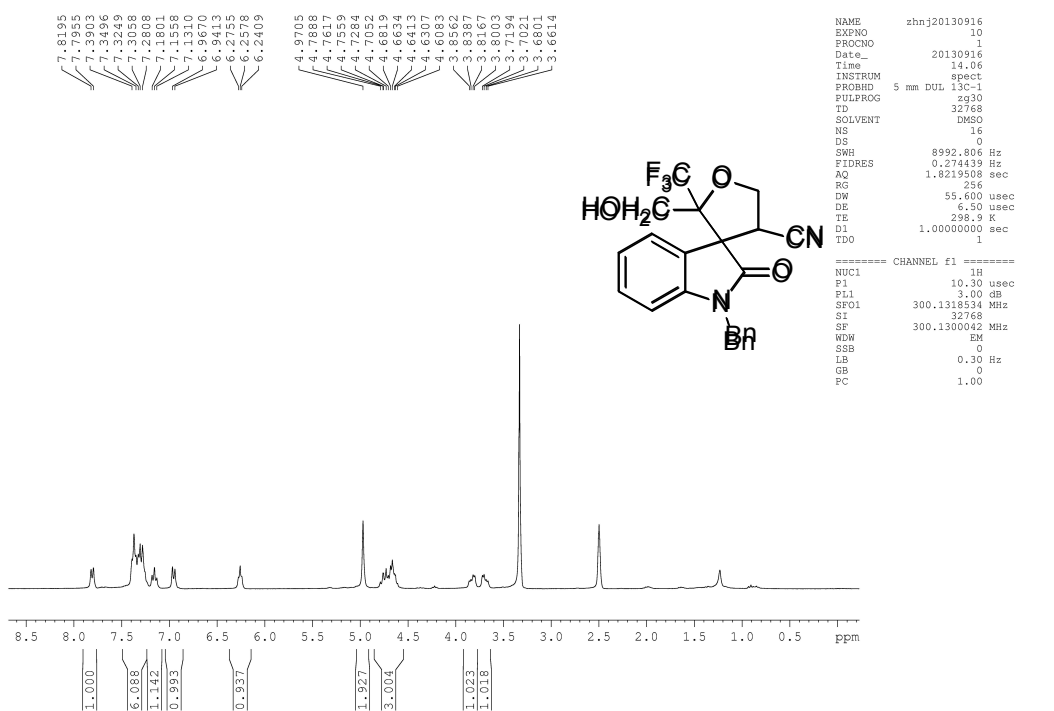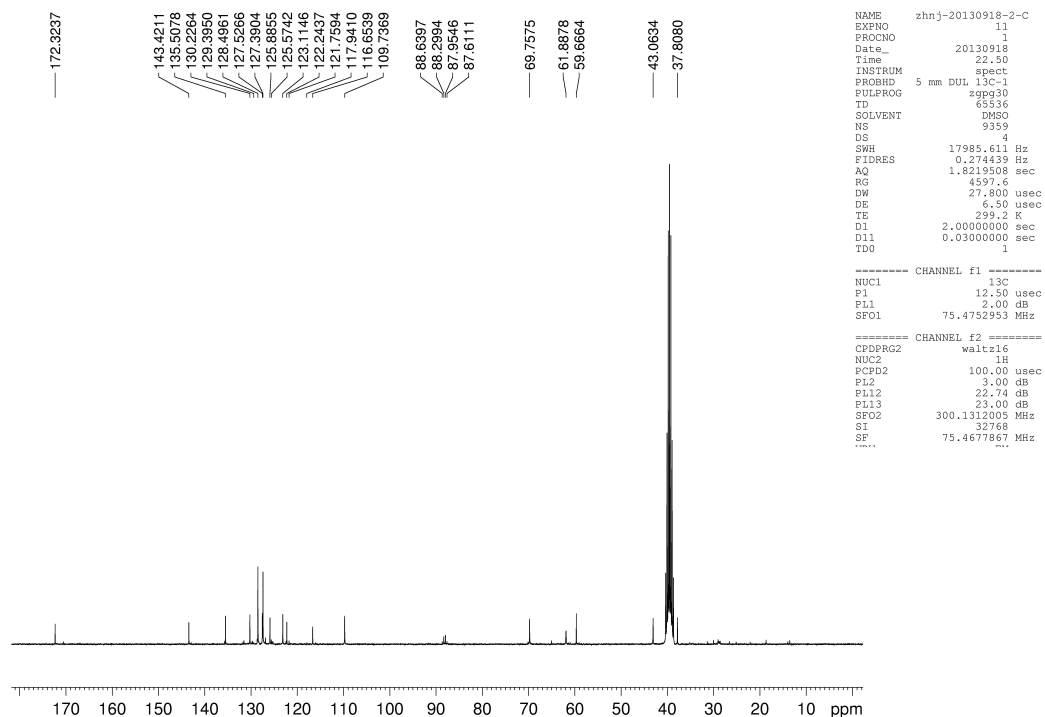

## 10. Chiral HPLC chromatography

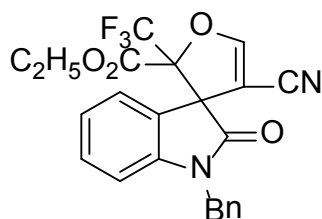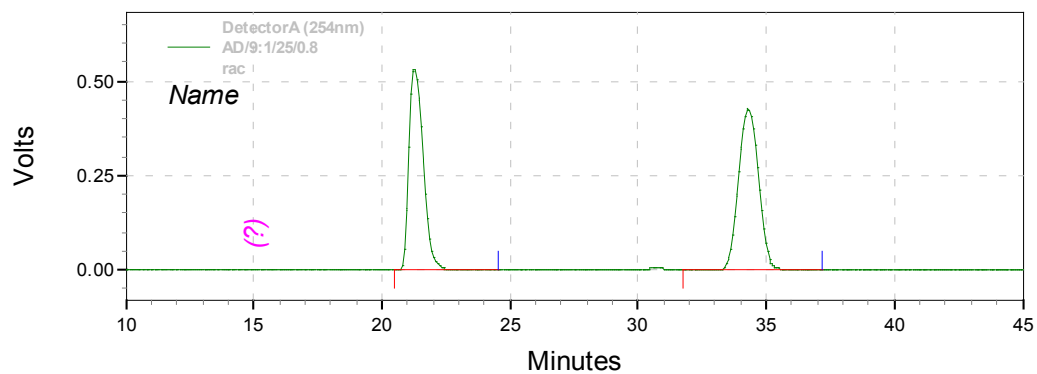

DetectorA (254nm)

| Pk # | Retention Time | Area     | Area % |
|------|----------------|----------|--------|
| 1    | 21.259         | 20710422 | 47.057 |
| 2    | 34.280         | 23300666 | 52.943 |

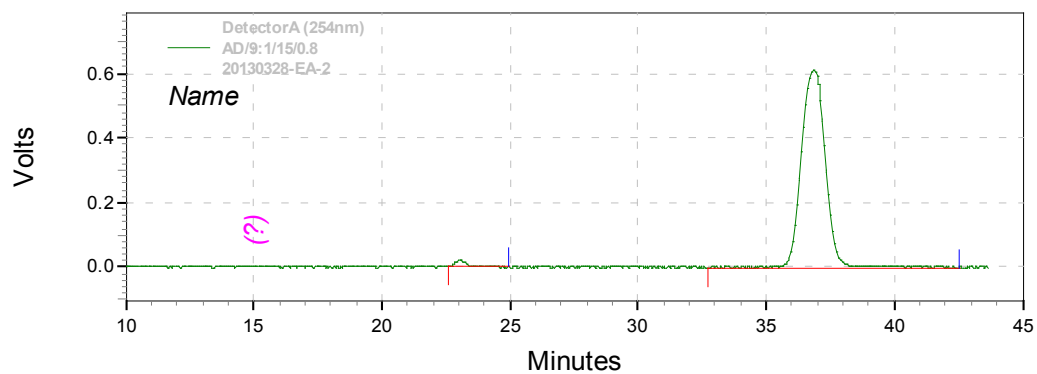

DetectorA (254nm)

| Pk # | Retention Time | Area     | Area % |
|------|----------------|----------|--------|
| 1    | 23.057         | 642117   | 1.594  |
| 2    | 36.841         | 39645486 | 98.406 |

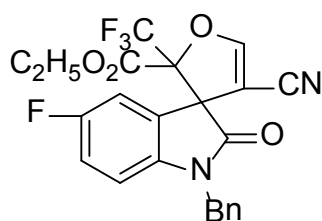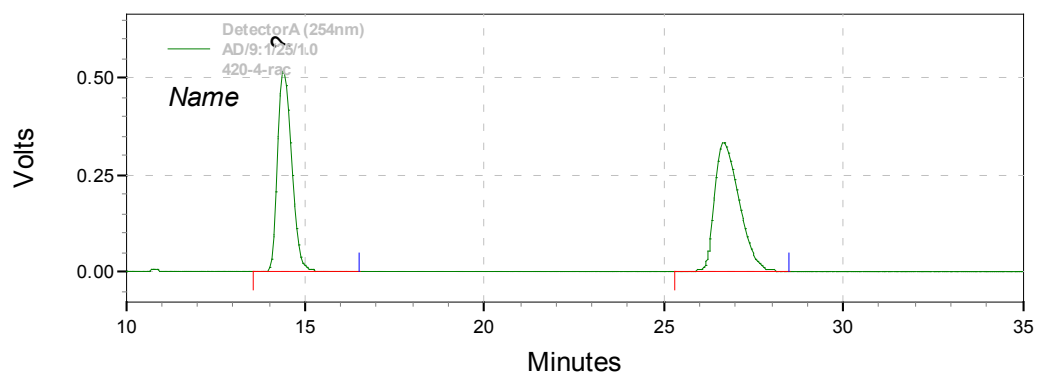

DetectorA (254nm)

| Pk # | Retention Time | Area     | Area % |
|------|----------------|----------|--------|
| 1    | 14.396         | 14063834 | 47.155 |
| 2    | 26.709         | 15761020 | 52.845 |

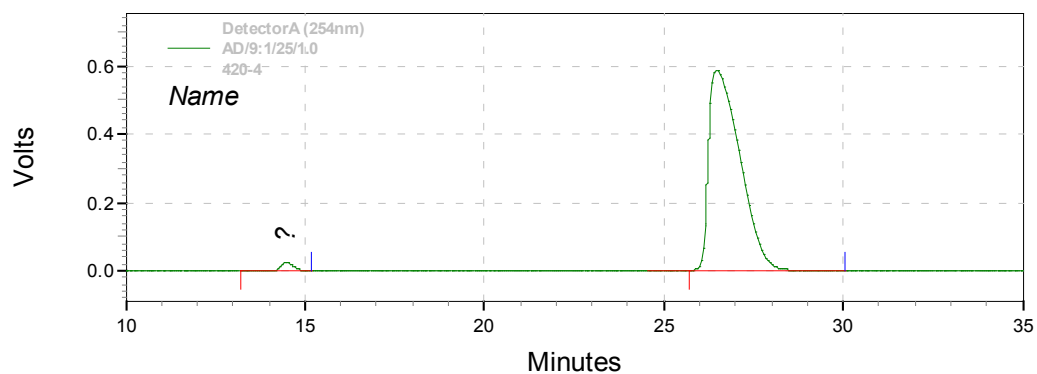

DetectorA (254nm)

| Pk # | Retention Time | Area     | Area % |
|------|----------------|----------|--------|
| 1    | 14.487         | 659955   | 1.801  |
| 2    | 26.509         | 35978687 | 98.199 |

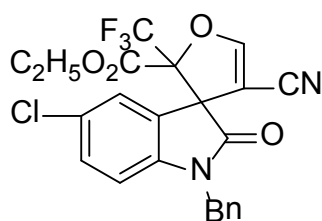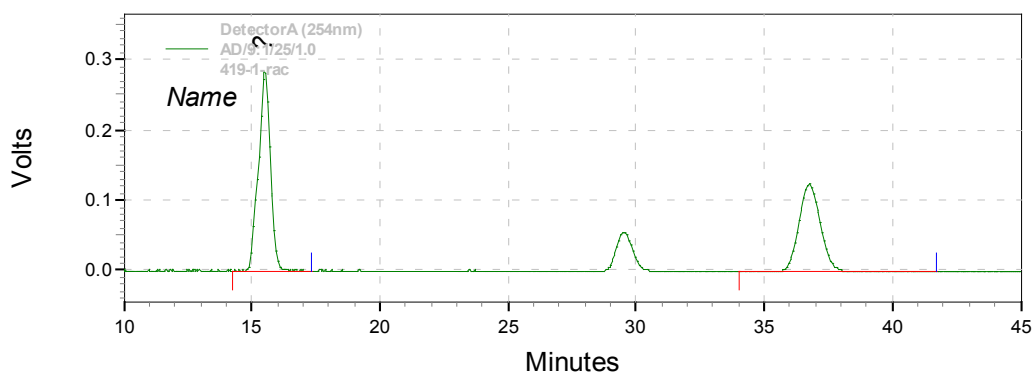

**DetectorA (254nm)**

| Pk # | Retention Time | Area    | Area % |
|------|----------------|---------|--------|
| 1    | 15.491         | 9153222 | 55.825 |
| 2    | 36.790         | 7243121 | 44.175 |

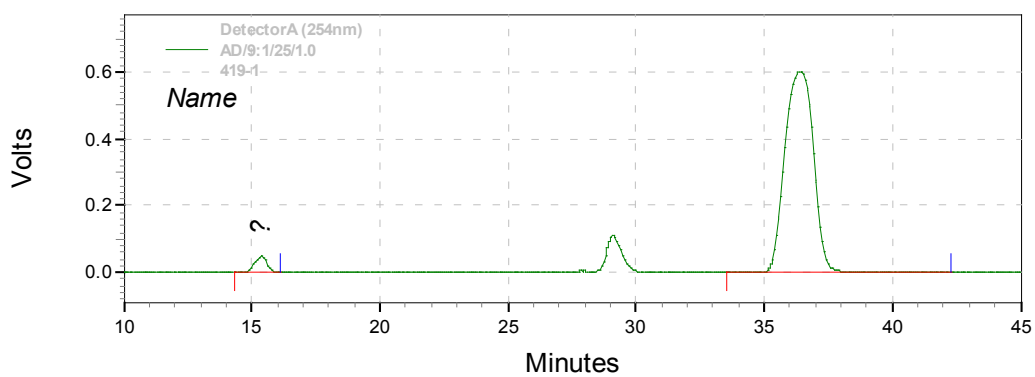

**DetectorA (254nm)**

| Pk # | Retention Time | Area     | Area % |
|------|----------------|----------|--------|
| 1    | 15.364         | 1647175  | 3.432  |
| 2    | 36.420         | 46349298 | 96.568 |

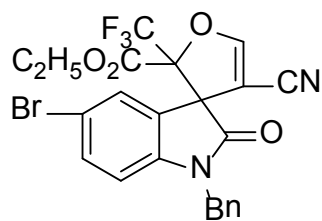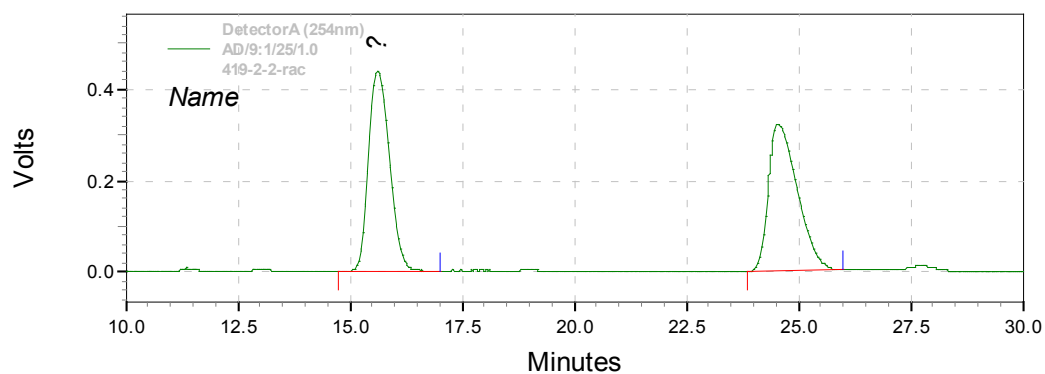

DetectorA (254nm)

| Pk # | Retention Time | Area     | Area % |
|------|----------------|----------|--------|
| 1    | 15.622         | 14003704 | 48.856 |
| 2    | 24.590         | 14659533 | 51.144 |

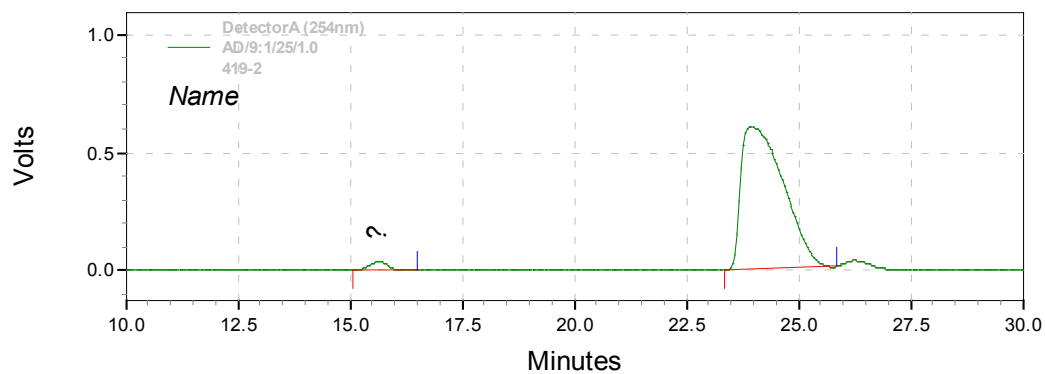

DetectorA (254nm)

| Pk # | Retention Time | Area     | Area % |
|------|----------------|----------|--------|
| 1    | 15.639         | 1038163  | 2.522  |
| 2    | 23.976         | 40132326 | 97.478 |



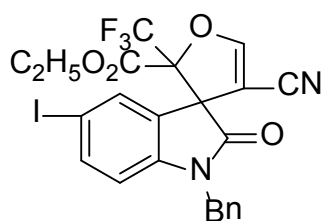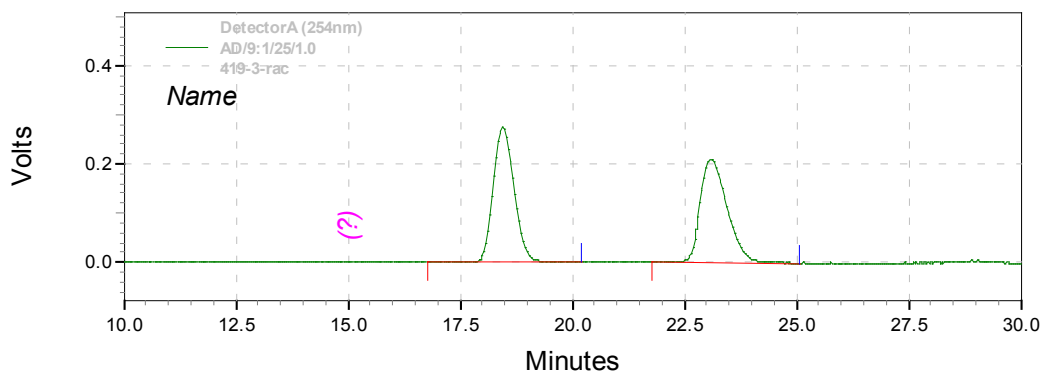

DetectorA (254nm)

| Pk # | Retention Time | Area    | Area % |
|------|----------------|---------|--------|
| 1    | 18.466         | 8751549 | 50.067 |
| 2    | 23.121         | 8728238 | 49.933 |

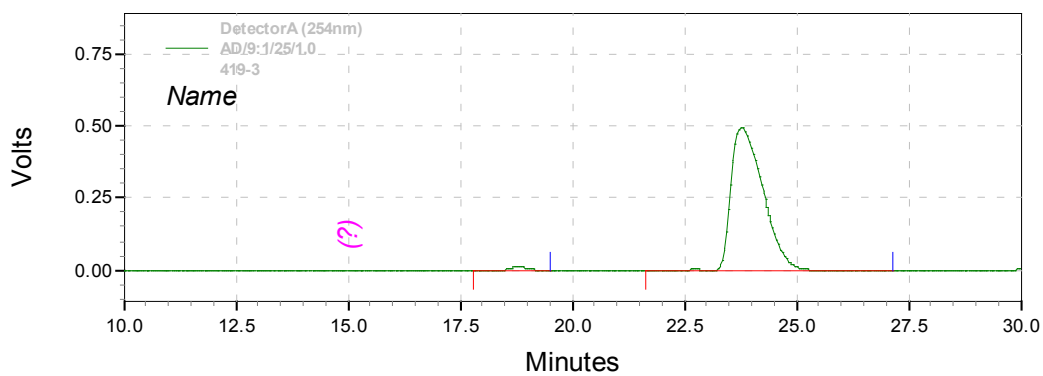

DetectorA (254nm)

| Pk # | Retention Time | Area     | Area % |
|------|----------------|----------|--------|
| 1    | 18.815         | 410304   | 1.609  |
| 2    | 23.792         | 25095076 | 98.391 |

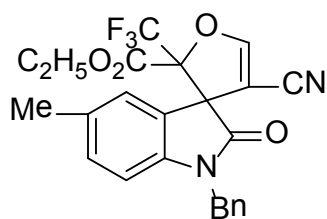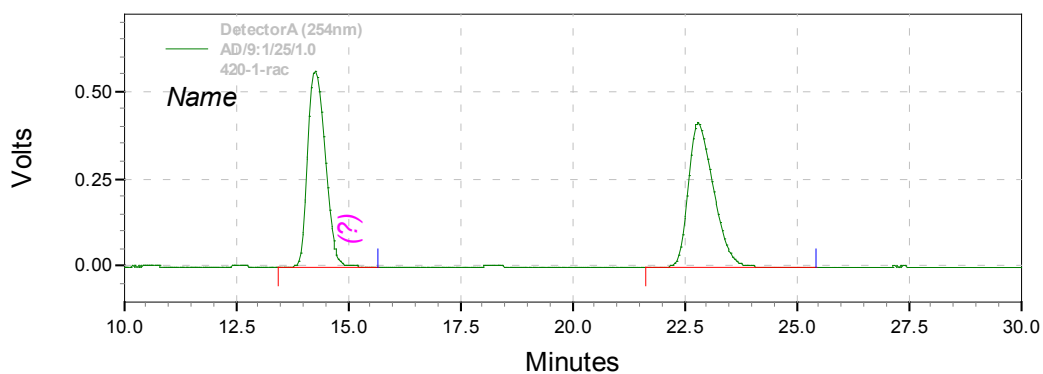

DetectorA (254nm)

| Pk # | Retention Time | Area     | Area % |
|------|----------------|----------|--------|
| 1    | 14.265         | 15111226 | 47.289 |
| 2    | 22.817         | 16844096 | 52.711 |

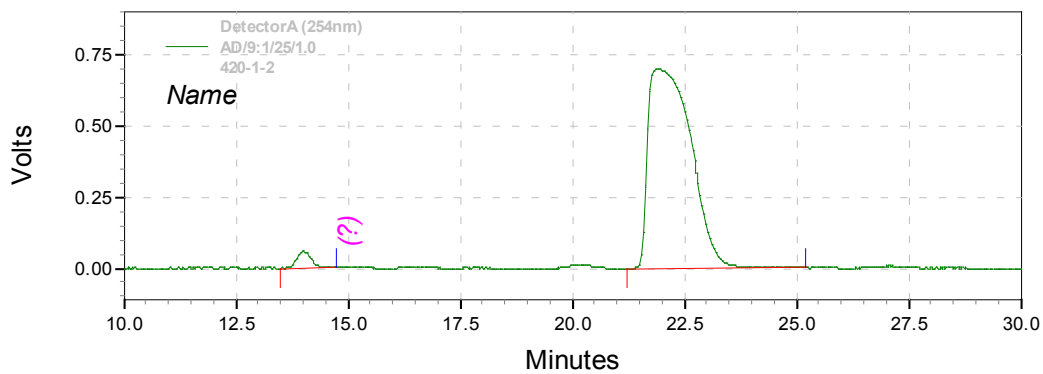

DetectorA (254nm)

| Pk # | Retention Time | Area     | Area % |
|------|----------------|----------|--------|
| 1    | 14.012         | 1275987  | 2.672  |
| 2    | 21.937         | 46476963 | 97.328 |

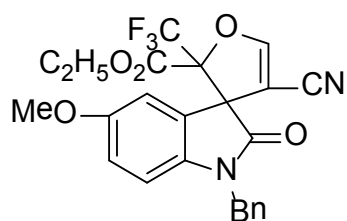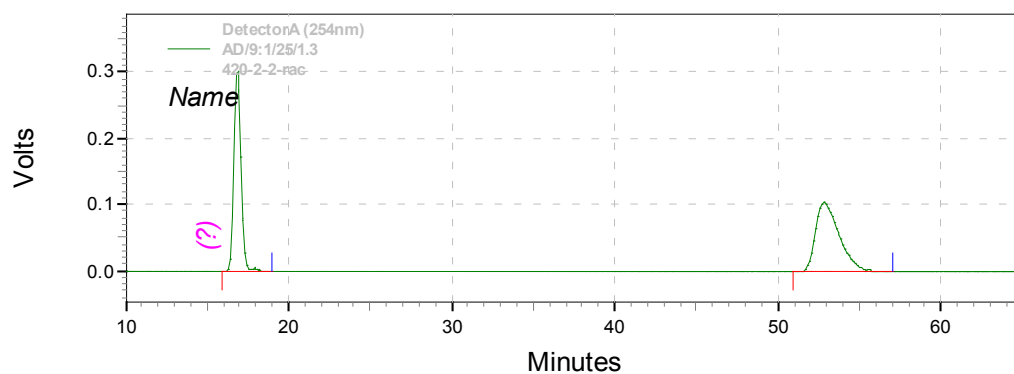

DetectorA (254nm)

| Pk # | Retention Time | Area     | Area % |
|------|----------------|----------|--------|
| 1    | 16.871         | 9155330  | 46.772 |
| 2    | 52.818         | 10418987 | 53.228 |

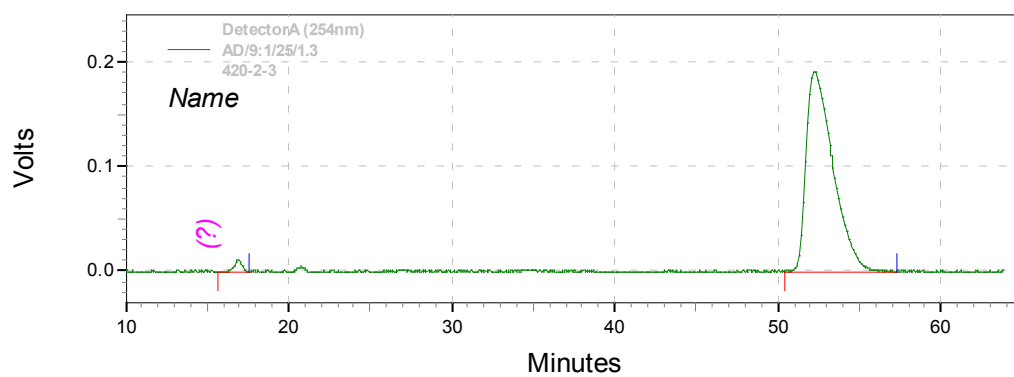

DetectorA (254nm)

| Pk # | Retention Time | Area     | Area % |
|------|----------------|----------|--------|
| 1    | 16.885         | 362247   | 1.619  |
| 2    | 52.252         | 22008355 | 98.381 |

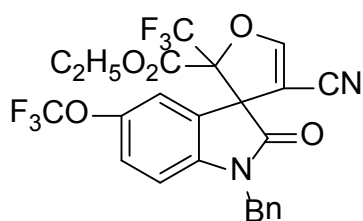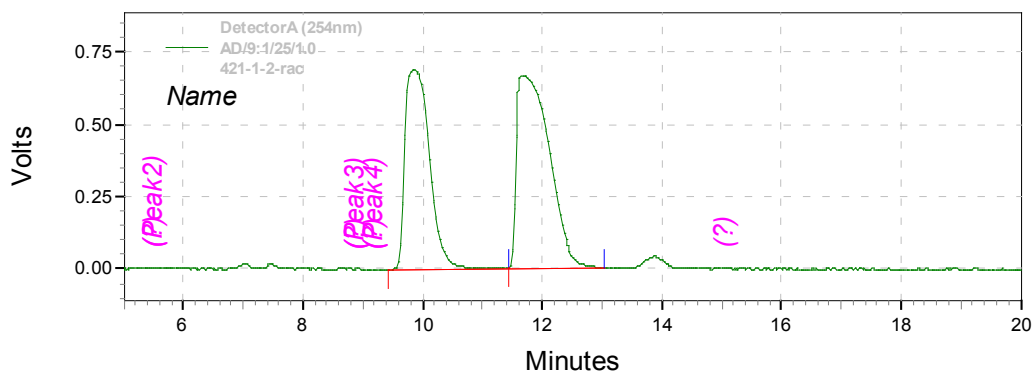

**DetectorA (254nm)**

| Pk # | Retention Time | Area     | Area % |
|------|----------------|----------|--------|
| 1    | 9.849          | 20165288 | 44.144 |
| 2    | 11.702         | 25515813 | 55.856 |

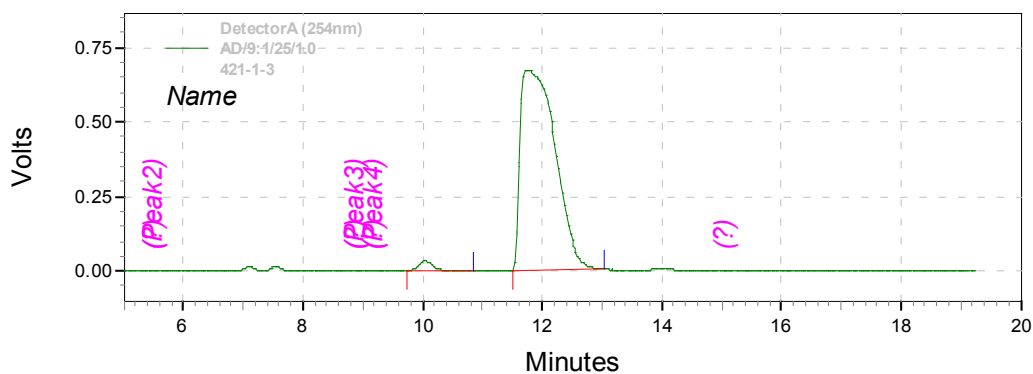

**DetectorA (254nm)**

| Pk # | Retention Time | Area     | Area % |
|------|----------------|----------|--------|
| 1    | 10.040         | 621220   | 2.229  |
| 2    | 11.771         | 27248217 | 97.771 |

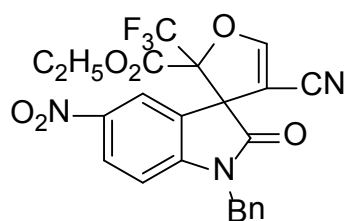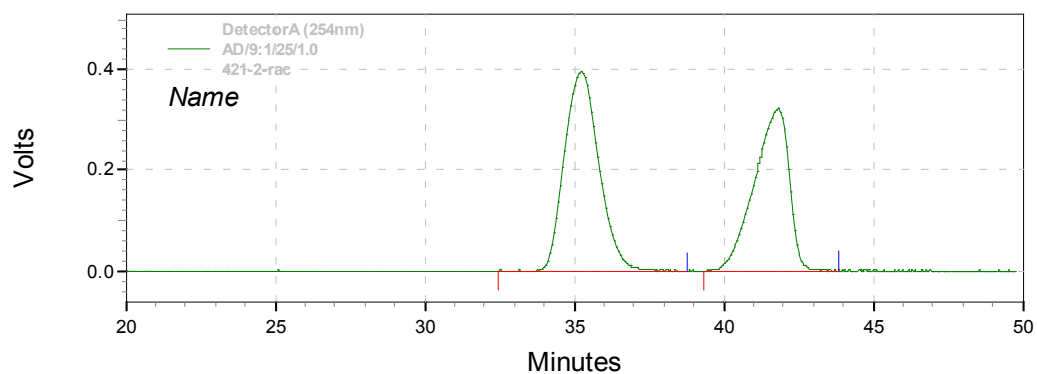

DetectorA (254nm)

| Pk # | Retention Time | Area     | Area % |
|------|----------------|----------|--------|
| 1    | 35.223         | 31360780 | 54.177 |
| 2    | 41.791         | 26524928 | 45.823 |

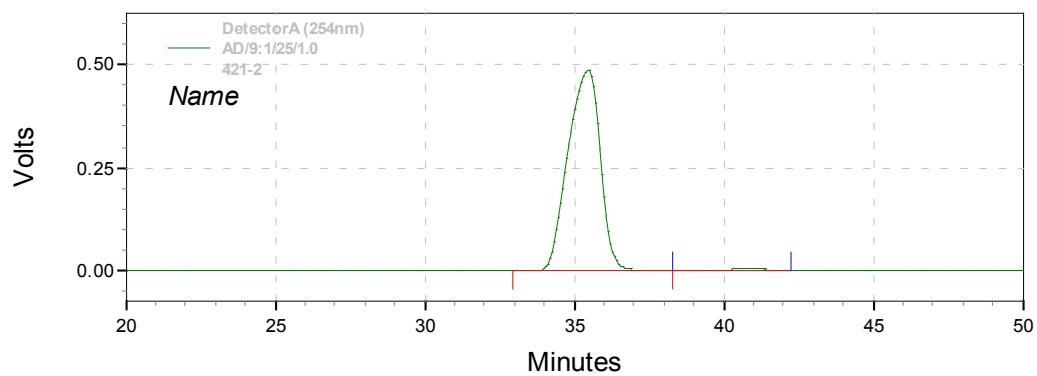

DetectorA (254nm)

| Pk # | Retention Time | Area     | Area % |
|------|----------------|----------|--------|
| 1    | 35.412         | 36099072 | 98.550 |
| 2    | 40.825         | 531230   | 1.450  |

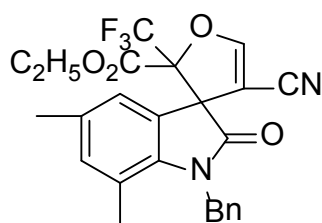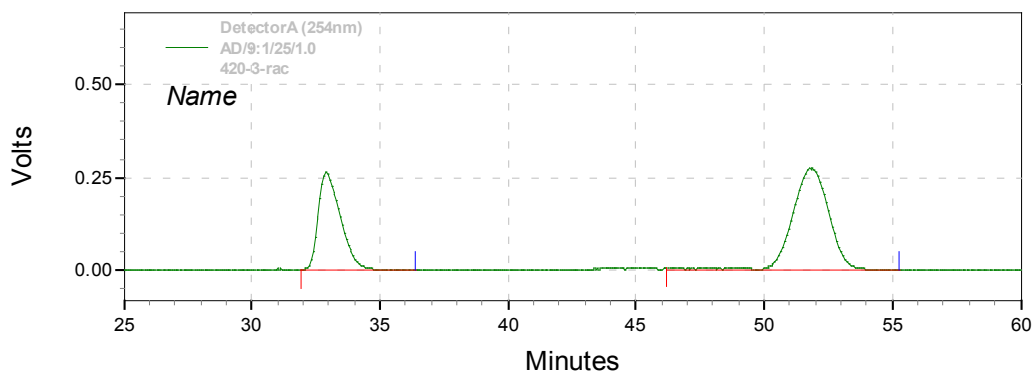

DetectorA (254nm)

| Pk # | Retention Time | Area     | Area % |
|------|----------------|----------|--------|
| 1    | 32.949         | 15424034 | 37.236 |
| 2    | 51.853         | 25998322 | 62.764 |

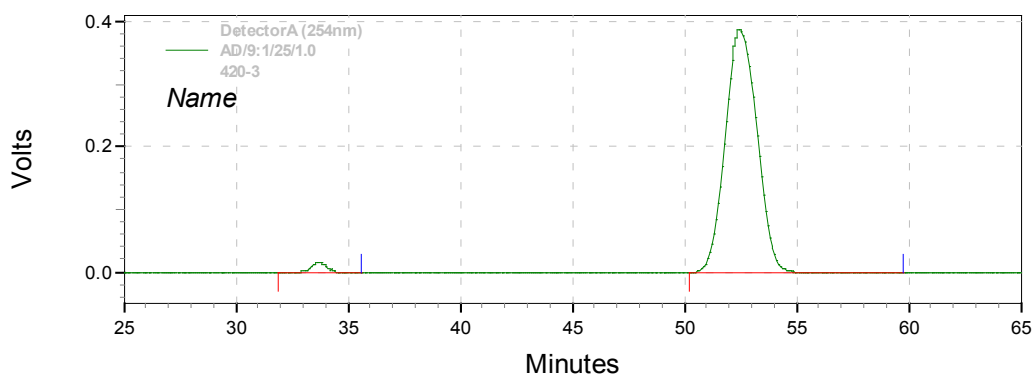

DetectorA (254nm)

| Pk # | Retention Time | Area     | Area % |
|------|----------------|----------|--------|
| 1    | 33.694         | 939431   | 2.277  |
| 2    | 52.512         | 40324784 | 97.723 |

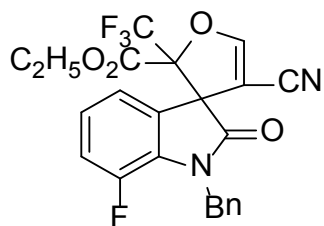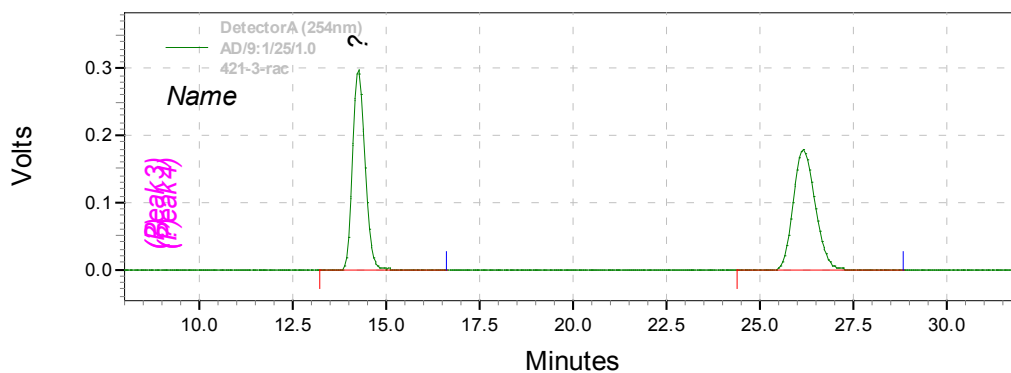

DetectorA (254nm)

| Pk # | Retention Time | Area    | Area % |
|------|----------------|---------|--------|
| 1    | 14.295         | 6963650 | 48.620 |
| 2    | 26.197         | 7359001 | 51.380 |

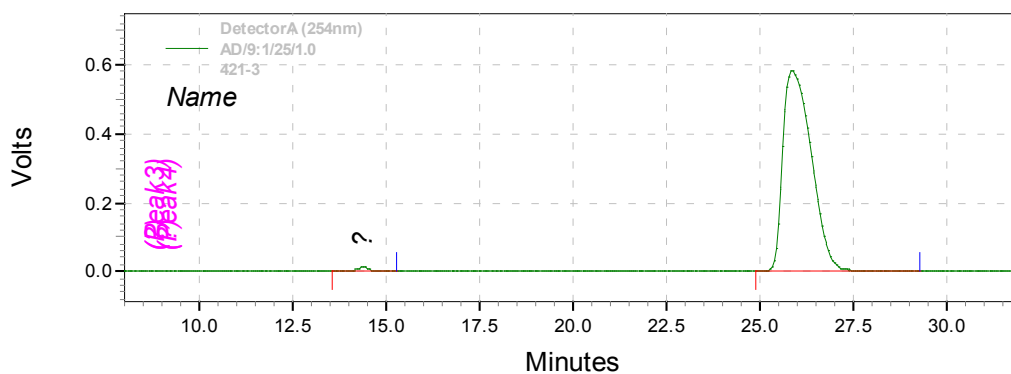

DetectorA (254nm)

| Pk # | Retention Time | Area     | Area % |
|------|----------------|----------|--------|
| 1    | 14.413         | 290622   | 0.932  |
| 2    | 25.926         | 30888422 | 99.068 |

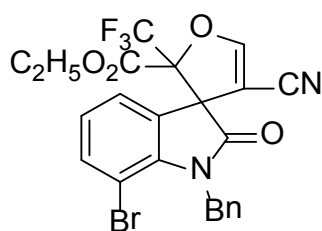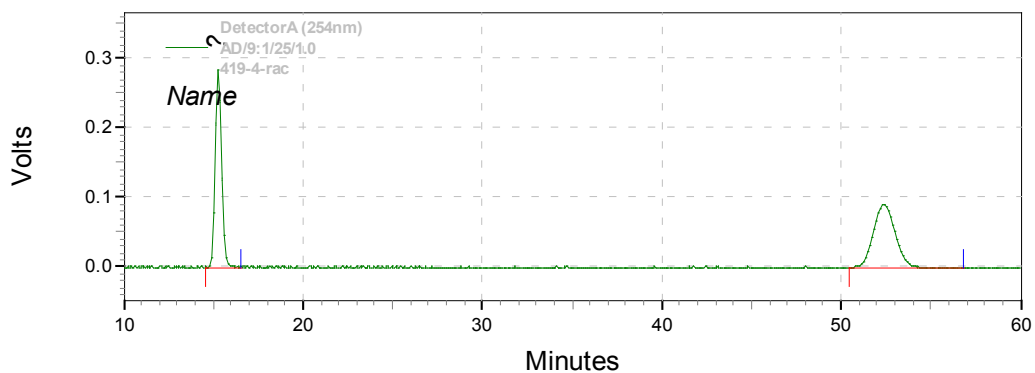

DetectorA (254nm)

| Pk # | Retention Time | Area    | Area % |
|------|----------------|---------|--------|
| 1    | 15.301         | 7055230 | 48.005 |
| 2    | 52.406         | 7641538 | 51.995 |

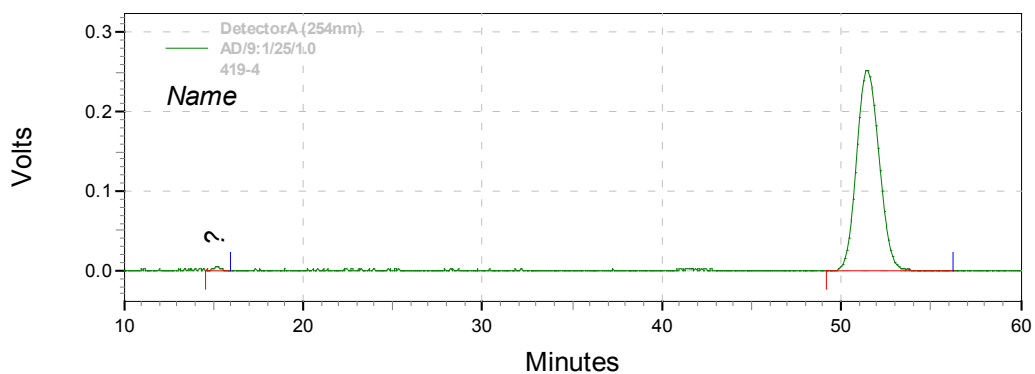

DetectorA (254nm)

| Pk # | Retention Time | Area     | Area % |
|------|----------------|----------|--------|
| 1    | 15.186         | 105613   | 0.475  |
| 2    | 51.479         | 22113888 | 99.525 |



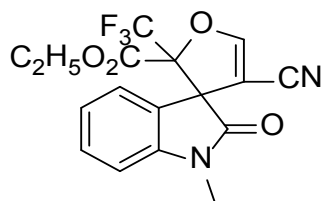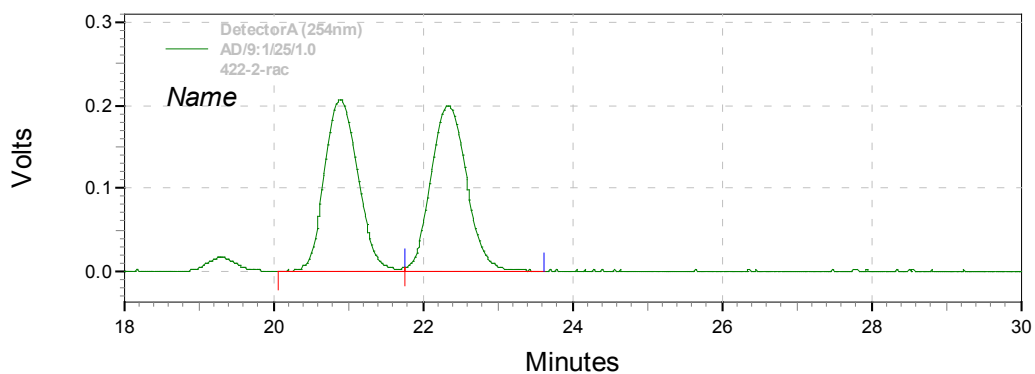

DetectorA (254nm)

| Pk # | Retention Time | Area    | Area % |
|------|----------------|---------|--------|
| 1    | 20.904         | 6413242 | 49.421 |
| 2    | 22.344         | 6563454 | 50.579 |

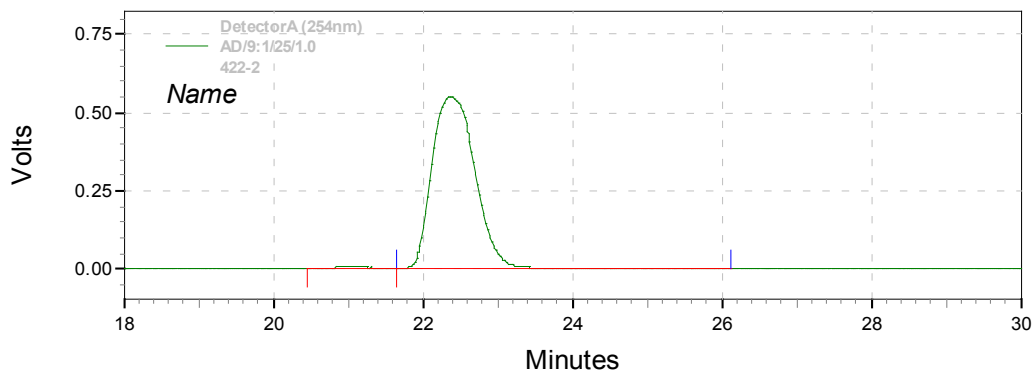

DetectorA (254nm)

| Pk # | Retention Time | Area     | Area % |
|------|----------------|----------|--------|
| 1    | 21.066         | 229702   | 1.031  |
| 2    | 22.389         | 22054054 | 98.969 |

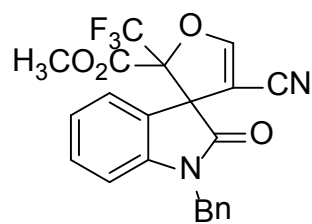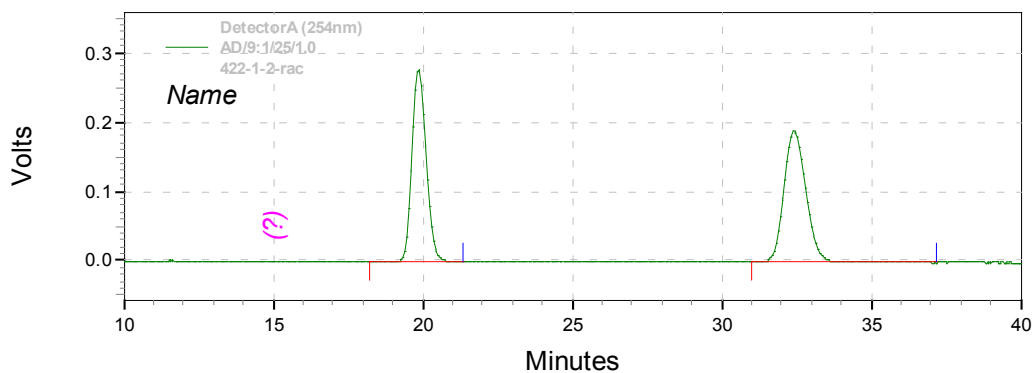

**DetectorA (254nm)**

| Pk # | Retention Time | Area    | Area % |
|------|----------------|---------|--------|
| 1    | 19.879         | 9092914 | 48.661 |
| 2    | 32.446         | 9593381 | 51.339 |

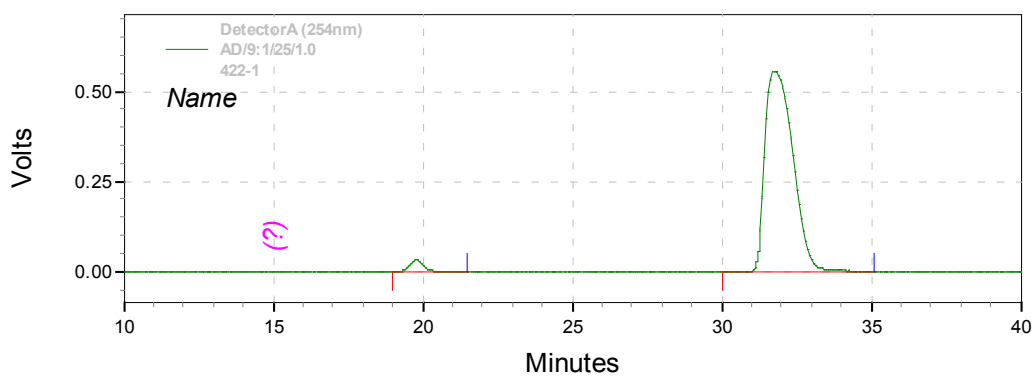

**DetectorA (254nm)**

| Pk # | Retention Time | Area     | Area % |
|------|----------------|----------|--------|
| 1    | 19.791         | 1015815  | 2.746  |
| 2    | 31.807         | 35970395 | 97.254 |

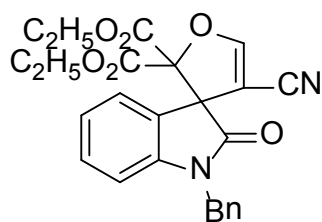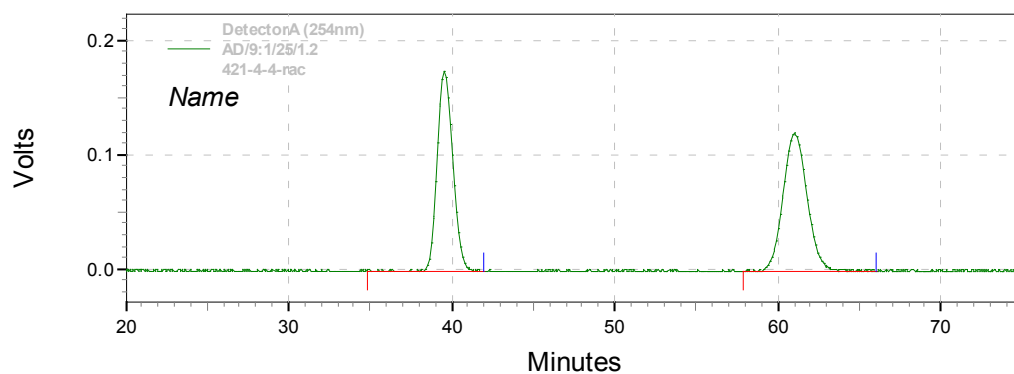

DetectorA (254nm)

| Pk # | Retention Time | Area     | Area % |
|------|----------------|----------|--------|
| 1    | 39.520         | 11641067 | 48.704 |
| 2    | 61.010         | 12260511 | 51.296 |

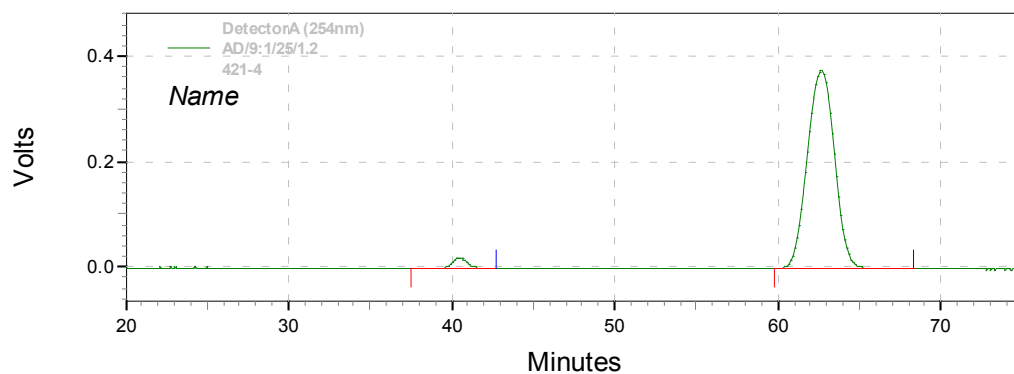

DetectorA (254nm)

| Pk # | Retention Time | Area     | Area % |
|------|----------------|----------|--------|
| 1    | 40.442         | 1365052  | 3.032  |
| 2    | 62.643         | 43651146 | 96.968 |

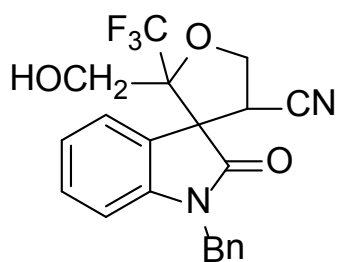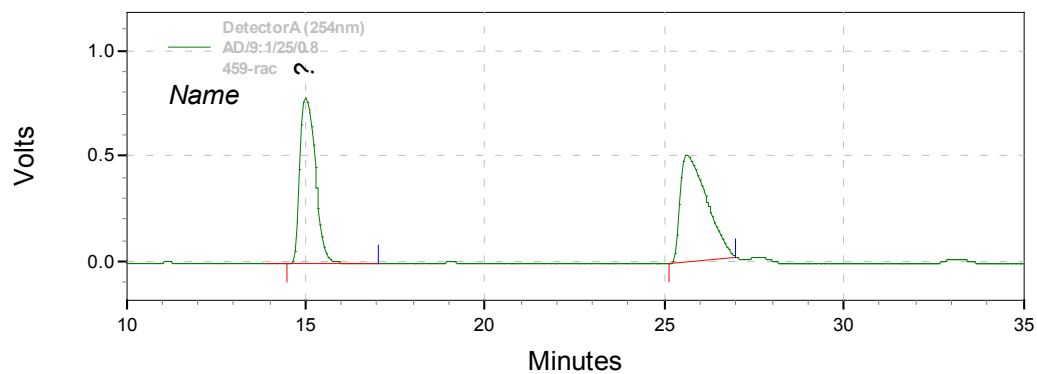

**DetectorA (254nm)**

| Pk # | Retention Time | Area     | Area % |
|------|----------------|----------|--------|
| 1    | 14.983         | 24583016 | 48.296 |
| 2    | 25.611         | 26317305 | 51.704 |

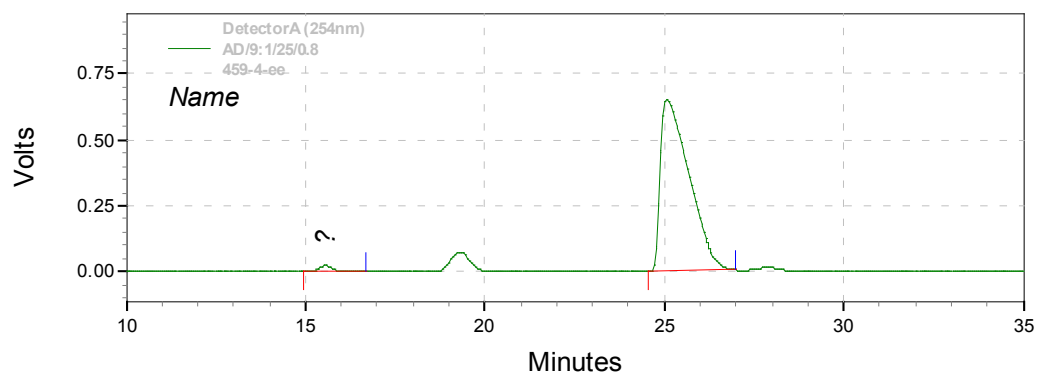

**DetectorA (254nm)**

| Pk # | Retention Time | Area     | Area % |
|------|----------------|----------|--------|
| 1    | 15.584         | 665328   | 1.826  |
| 2    | 25.066         | 35772110 | 98.174 |
